# Supplementary material for: Investigating leaf beetles (Coleoptera, Chrysomelidae) on the west coast islands of Sabah via checklist-taking and DNA barcoding
Source: PeerJ. 2018 Oct 25;6:e5811. doi: 10.7717/peerj.5811 (PMC6204241; doi:10.7717/peerj.5811)
Supplement: Supplemental Information 3 [file peerj-06-5811-s003.xlsx]

## Sheet: Distance Summary Table
Distance Summary Tables (excluding Nodina sp.)
Label	n	Taxa	Comparisons	Min Dist(%)	Mean Dist(%)	Max Dist(%)	SE Dist(%)
Within Species	51	15	86	0	0.77	1.99	0.01
Within Genus	58	8	419	4.71	16.11	24.6	0.01
Within Family	95	1	3960	6.61	22.73	33.87	0

## Sheet: Altica aenea
Intraspecific distance of Altica aenea (Olivier,1808) (%)
	BOR/COL 8071	BOR/COL 8166
BOR/COL 8071	-	0
BOR/COL 8166	0	-
Distance range	0
Mean Intra-sp distance	0

## Sheet: Brontispa longissima
Intraspecific distance of Brontispa longissima Sharp, 1904 (%)
	BOR/COL 8054	BOR/COL 8397	BOR/COL 8453
BOR/COL 8054	-	0	0.149644
BOR/COL 8397	0	-	0.149868
BOR/COL 8453	0.149644	0.149868	-
Distance range	0 % - 0.15 %
Mean Intra-sp distance	0.001

## Sheet: Dercetina sp.
Intraspecific distance of Dercetina sp. (%)
	BOR/COL 8150	BOR/COL 8428
BOR/COL 8150	-	0.302573
BOR/COL 8428	0.302573	-
Distance range	0.003
Mean Intra-sp distance	0.003

## Sheet: genus indet. nr. Monolepta
Intraspecific distance of genus indet. nr. Monolepta (%)
	BOR/COL 8277	BOR/COL 9875	BOR/COL 9893
BOR/COL 8277	-	0.149198	0.300525
BOR/COL 9875	0.149198	-	0.150319
BOR/COL 9893	0.300525	0.150319	-
Distance range	0.15 % - 0.31 %
Mean Intra-sp distance	0.002

## Sheet: Gonophora sp.
Intraspecific distance of Gonophora sp. (%)
	BOR/COL 8016	BOR/COL 8260	BOR/COL 8344	BOR/COL 8423
BOR/COL 8016	-	1.36732	1.37358	1.37779
BOR/COL 8260	1.36732	-	0	0
BOR/COL 8344	1.37358	0	-	0
BOR/COL 8423	1.37779	0	0	-
Distance range	0 % - 1.38 %
Mean Intra-sp distance	0.0069

## Sheet: Hoplosaenidea malayensis
Intraspecific distance of Hoplosaenidea malayensis (Jacoby, 1884) (%)
	BOR/COL 8330	BOR/COL 8425	BOR/COL 8440
BOR/COL 8330	-	0.149255	0.149255
BOR/COL 8425	0.149255	-	0
BOR/COL 8440	0.149255	0	-
Distance range	0 % - 0.15 %
Mean Intra-sp distance	0.001

## Sheet: Hoplosaenidea sp. 5
Intraspecific distance of Hoplosaenidea sp. 5 (%)
	BOR/COL 9720	BOR/COL 9721
BOR/COL 9720	-	-
BOR/COL 9721	0	0
Distance range	0
Mean Intra-sp distance	0

## Sheet: Metrioidea grandis
Intraspecific distance of Metrioidea grandis (Allard, 1889) (%)
	BOR/COL 8094	BOR/COL 8417
BOR/COL 8094	-	1.98871
BOR/COL 8417	1.98871	-
Distance range	0.0198871
Mean Intra-sp distance	0.0198871

## Sheet: Monolepta sp. 1
Intraspecific distance of Monolepta sp. 1 (%)
	BOR/COL 08323	BOR/COL 08427
BOR/COL 08323	-	0.9161
BOR/COL 08427	0.9161	-
Distance range	0.0092
Mean Intra-sp distance	0.0092

[truncated: 7 more sheets: Monolepta sp. 5, Monolepta sp. 9, Monolepta sp. 10, Monolepta sp. 14, Nodina sp., Ochralea nigripes, Rhyparida sp. 1]
