# Supplementary material for: Investigating leaf beetles (Coleoptera, Chrysomelidae) on the west coast islands of Sabah via checklist-taking and DNA barcoding
Source: PeerJ. 2018 Oct 25;6:e5811. doi: 10.7717/peerj.5811 (PMC6204241; doi:10.7717/peerj.5811)
Supplement: Supplemental Information 4 [file peerj-06-5811-s004.xlsx]

## Sheet: Distance Summary Table
Distance Summary Tables (excluding Nodina sp.)
Label	n	Taxa	Comparisons	Min Dist(%)	Mean Dist(%)	Max Dist(%)	SE Dist(%)
Within Species	51	15	86	0	0.77	1.99	0.01
Within Genus	58	8	419	4.71	16.11	24.6	0.01
Within Family	95	1	3960	6.61	22.73	33.87	0

## Sheet: Argopistes
Interspecific distance for genus Argopistes (%)
	Argopistes sp. 1 BOR/COL 08442	Argopistes sp. 2 BOR/COL 09608
Argopistes sp. 1 BOR/COL 08442	-	15.3776
Argopistes sp. 2 BOR/COL 09608	15.3776	-
Distance range	0.153776
Mean Inter-sp distance	0.153776

## Sheet: Basilepta
Interspecific distance for genus Basilepta (%)
	Basilepta sp. 1 BOR/COL 08202	Basilepta sp. 2 BOR/COL 06930	Basilepta sp. 3 BOR/COL 09379	Basilepta sp. 4 BOR/COL 08064
Basilepta sp. 1 BOR/COL 08202	-	13.6309	19.6229	18.3906
Basilepta sp. 2 BOR/COL 06930	13.6309	-	18.0567	16.774
Basilepta sp. 3 BOR/COL 09379	19.6229	18.0567	-	21.6303
Basilepta sp. 4 BOR/COL 08064	18.3906	16.774	21.6303	-
Distance range	13.63 % - 21.63 %
Mean Inter-sp distance	0.180176

## Sheet: Colaspoides
Interspecific distance for genus Colaspoides (%)
	Colaspoides sp. 1 BOR/COL 09398	Colaspoides tuberculata BOR/COL 09858
Colaspoides sp. 1 BOR/COL 09398	-	23.0305
Colaspoides tuberculata BOR/COL 09858	23.0305	-
Distance range	0.230305
Mean Inter-sp distance	0.230305

## Sheet: Dactylispa
Interspecific distance for genus Dactylispa (%)
	Dactylispa sp. 1 BOR/COL 09777	Dactylispa sp. 2 BOR/COL 08305
Dactylispa sp. 1 BOR/COL 09777	-	21.3199
Dactylispa sp. 2 BOR/COL 08305	21.3199	-
Distance range	0.213199
Mean Inter-sp distance	0.213199

## Sheet: Hoplosaenidea
Interspecific distance for genus Hoplosaenidea (%)
	Hoplosaenidea malayensis BOR/COL 08330	Hoplosaenidea malayensis BOR/COL 08425	Hoplosaenidea malayensis BOR/COL 08440	Hoplosaenidea variabilis BOR/COL 09638	Hoplosaenidea sp. 1 BOR/COL 07000	Hoplosaenidea sp. 2 BOR/COL 08538	Hoplosaenidea sp. 4 BOR/COL 08095	Hoplosaenidea sp. 5 BOR/COL 09720	Hoplosaenidea sp. 5 BOR/COL 09721
Hoplosaenidea malayensis BOR/COL 08330	-	-	-	15.688	17.7691	13.8327	17.2176	18.627	18.8214
Hoplosaenidea malayensis BOR/COL 08425	-	-	-	15.9573	18.2045	13.9964	17.4994	18.7966	19.0259
Hoplosaenidea malayensis BOR/COL 08440	-	-	-	16.1189	17.9588	14.2318	17.6186	19.1258	19.1931
Hoplosaenidea variabilis BOR/COL 09638	15.688	15.9573	16.1189	-	18.7119	18.7982	21.8655	21.9632	22.3532
Hoplosaenidea sp. 1 BOR/COL 07000	17.7691	18.2045	17.9588	18.7119	-	20.2463	19.3046	20.5941	20.6668
Hoplosaenidea sp. 2 BOR/COL 08538	13.8327	13.9964	14.2318	18.7982	20.2463	-	19.6175	21.4507	21.7543
Hoplosaenidea sp. 4 BOR/COL 08095	17.2176	17.4994	17.6186	21.8655	19.3046	19.6175	-	4.7084	4.73816
Hoplosaenidea sp. 5 BOR/COL 09720	18.627	18.7966	19.1258	21.9632	20.5941	21.4507	4.7084	-	-
Hoplosaenidea sp. 5 BOR/COL 09721	18.8214	19.0259	19.1931	22.3532	20.6668	21.7543	4.73816	-	-
Distance range	4.71 % - 22.35 %
Mean Inter-sp distance	0.177017

## Sheet: Monolepta
Interspecific distance for genus Monolepta (%)
	Monolepta sp. 1 BOR/COL 08323	Monolepta sp. 1 BOR/COL 08427	Monolepta sp. 2 BOR/COL 06931	Monolepta sp. 3 BOR/COL 06924	Monolepta sp. 4 BOR/COL 06921	Monolepta sp. 5 BOR/COL 08178	Monolepta sp. 5 BOR/COL 08180	Monolepta sp. 5 BOR/COL 08348	Monolepta sp. 5 BOR/COL 08403	Monolepta sp. 5 BOR/COL 09718	Monolepta sp. 5 BOR/COL 09719	Monolepta sp. 5 BOR/COL 09734	Monolepta sp. 5 BOR/COL 09897	Monolepta sp. 6 BOR/COL 08531	Monolepta sp. 7 BOR/COL 08426	Monolepta sp. 8 BOR/COL 08314	Monolepta sp. 9 BOR/COL 08525	Monolepta sp. 9 BOR/COL 09440	Monolepta sp. 9 BOR/COL 09825	Monolepta sp. 10 BOR/COL 08104	Monolepta sp. 10 BOR/COL 08181	Monolepta sp. 11 BOR/COL 08119	Monolepta sp. 12 BOR/COL 09201	Monolepta sp. 14 BOR/COL 09418	Monolepta sp. 14 BOR/COL 09556	Monolepta sp. 14 BOR/COL 09557	Monolepta sp. 15 BOR/COL 08456	Monolepta sp. 17 BOR/COL 09449	Monolepta sp. 18 BOR/COL 09679
Monolepta sp. 1 BOR/COL 08323	-	-	19.7752	20.0925	19.1199	18.2852	17.5991	18.8115	18.4208	18.547	17.7247	17.8748	17.6807	21.9083	17.2797	22.3053	20.6993	21.7558	21.3805	21.1223	21.0494	20.8534	22.1703	24.17	23.9123	24.5982	18.6816	19.6308	22.1085
Monolepta sp. 1 BOR/COL 08427	-	-	20.2934	21.2316	19.021	18.7395	18.1417	19.1452	18.9419	19.1076	18.2629	18.5379	18.3371	21.7202	17.2029	22.8589	20.7104	21.8916	21.4732	21.2856	21.2856	21.4635	22.5895	23.913	23.7364	24.3441	18.5143	19.2935	22.6565
Monolepta sp. 2 BOR/COL 06931	19.7752	20.2934	-	15.2847	12.7106	11.7467	10.9208	11.5418	11.43	11.6826	10.7802	11.1459	10.8159	16.6044	11.4029	11.7089	14.1759	14.6335	14.1082	14.0975	13.96	13.1592	19.0863	18.0377	17.8752	17.8421	14.1296	10.4174	14.1885
Monolepta sp. 3 BOR/COL 06924	20.0925	21.2316	15.2847	-	14.2061	13.1304	12.9847	13.3034	12.9937	13.0575	13.2163	12.4945	13.2238	13.8133	14.2683	12.3701	11.4988	12.1231	12.3188	13.1851	13.0572	12.2724	16.8816	18.4749	18.4867	18.8749	12.4886	9.56556	12.0481
Monolepta sp. 4 BOR/COL 06921	19.1199	19.021	12.7106	14.2061	-	13.6556	13.7491	13.8361	13.3412	13.6094	13.4068	13.0352	13.4109	15.2722	12.2825	14.1575	12.5568	13.7249	13.2069	11.2341	11.1268	12.6333	20.1835	17.8336	18.0663	18.225	10.0207	12.4951	13.4395
Monolepta sp. 5 BOR/COL 08178	18.2852	18.7395	11.7467	13.1304	13.6556	-	-	-	-	-	-	-	-	15.5342	11.7617	14.1376	13.4989	13.5786	13.0575	13.4493	13.3396	13.9956	19.3964	20.2914	20.5931	20.2914	12.1449	11.1497	14.8678
Monolepta sp. 5 BOR/COL 08180	17.5991	18.1417	10.9208	12.9847	13.7491	-	-	-	-	-	-	-	-	14.4456	11.2089	14.5335	14.462	14.4715	14.0991	13.2719	13.2483	13.8498	18.6874	19.9067	19.7219	20.1285	12.2312	10.9928	14.9448
Monolepta sp. 5 BOR/COL 08348	18.8115	19.1452	11.5418	13.3034	13.8361	-	-	-	-	-	-	-	-	15.5342	11.7617	14.2079	3.68104	13.8518	13.3253	13.516	13.516	14.0654	19.3964	20.0199	20.1694	20.0199	12.1449	11.5418	14.9671
Monolepta sp. 5 BOR/COL 08403	18.4208	18.9419	11.43	12.9937	13.3412	-	-	-	-	-	-	-	-	14.9205	11.7617	13.7051	13.2736	13.3971	12.8776	12.8388	12.8388	13.9266	18.7425	19.8815	20.062	19.8815	11.7845	10.938	14.4483
Monolepta sp. 5 BOR/COL 09718	18.547	19.1076	11.6826	13.0575	13.6094	-	-	-	-	-	-	-	-	15.3971	11.9802	13.75	13.5661	13.7593	13.2307	13.3761	13.3539	14.2757	19.1548	20.368	20.0231	20.368	12.0435	11.4193	14.7549
Monolepta sp. 5 BOR/COL 09719	17.7247	18.2629	10.7802	13.2163	13.4068	-	-	-	-	-	-	-	-	14.2518	11.2463	13.7275	13.7264	13.7364	13.2088	12.987	12.9656	13.5098	18.9482	19.7125	19.6442	19.7125	12.2051	10.6914	14.3587
Monolepta sp. 5 BOR/COL 09734	17.8748	18.5379	11.1459	12.4945	13.0352	-	-	-	-	-	-	-	-	15.2943	11.5832	13.3932	13.0935	13.1947	12.6777	12.8388	12.7763	13.7203	18.7425	19.644	19.6099	19.644	11.6053	10.938	14.1709
Monolepta sp. 5 BOR/COL 09897	17.6807	18.3371	10.8159	13.2238	13.4109	-	-	-	-	-	-	-	-	14.3649	11.4052	13.9309	13.8181	13.7382	13.2163	13.0196	12.9773	13.5374	19.1548	19.644	19.8161	19.644	12.326	10.7628	14.3537
Monolepta sp. 6 BOR/COL 08531	21.9083	21.7202	16.6044	13.8133	15.2722	15.5342	14.4456	15.5342	14.9205	15.3971	14.2518	15.2943	14.3649	-	14.1225	16.2175	13.6683	15.5029	15.153	15.0892	15.0892	16.8031	17.2445	18.356	18.6037	18.7521	15.2575	14.9013	16.5712
Monolepta sp. 7 BOR/COL 08426	17.2797	17.2029	11.4029	14.2683	12.2825	11.7617	11.2089	11.7617	11.7617	11.9802	11.2463	11.5832	11.4052	14.1225	-	13.7455	15.7765	16.1412	15.7876	13.0246	13.0246	12.8297	18.2501	19.2506	19.487	19.6555	13.0763	11.4029	13.7407
Monolepta sp. 8 BOR/COL 08314	22.3053	22.8589	11.7089	12.3701	14.1575	14.1376	14.5335	14.2079	13.7051	13.75	13.7275	13.3932	13.9309	16.2175	13.7455	-	13.1115	13.6107	13.0837	15.7172	15.6912	12.4544	16.5333	20.8068	20.7937	20.6023	13.7856	12.711	13.3313
Monolepta sp. 9 BOR/COL 08525	20.6993	20.7104	14.1759	11.4988	12.5568	13.4989	14.462	13.681	13.2736	13.5661	13.7264	13.0935	13.8181	13.6683	15.7765	13.1115	-	-	-	15.2722	15.2722	15.8439	18.8287	20.1525	20.481	20.1525	13.2236	13.6304	14.3649
Monolepta sp. 9 BOR/COL 09440	21.7558	21.8916	14.6335	12.1231	13.7249	13.5786	14.4715	13.8518	13.3971	13.7593	13.7364	13.1947	13.7382	15.5029	16.1412	13.6107	-	-	-	16.3117	16.2845	15.4169	20.2292	21.5831	22.1462	21.5831	13.2036	14.3094	14.4575
Monolepta sp. 9 BOR/COL 09825	21.3805	21.4732	14.1082	12.3188	13.2069	13.0575	14.0991	13.3253	12.8776	13.2307	13.2088	12.6777	13.2163	15.153	15.7876	13.0837	-	-	-	15.7762	15.75	15.2546	19.6475	21.0009	21.5424	21.0009	13.3858	14.3331	13.9319
Monolepta sp. 10 BOR/COL 08104	21.1223	21.2856	14.0975	13.1851	11.2341	13.4493	13.2719	13.516	12.8388	13.3761	12.987	12.8388	13.0196	15.0892	13.0246	15.7172	15.2722	16.3117	15.7762	-	-	13.543	18.4753	16.7257	16.8224	17.111	14.1145	11.9795	14.2505
Monolepta sp. 10 BOR/COL 08181	21.0494	21.2856	13.96	13.0572	11.1268	13.3396	13.2483	13.516	12.8388	13.3539	12.9656	12.7763	12.9773	15.0892	13.0246	15.6912	15.2722	16.2845	15.75	-	-	13.5209	18.4753	16.6976	16.7934	17.0822	14.1145	11.9795	14.2038
Monolepta sp. 11 BOR/COL 08119	20.8534	21.4635	13.1592	12.2724	12.6333	13.9956	13.8498	14.0654	13.9266	14.2757	13.5098	13.7203	13.5374	16.8031	12.8297	12.4544	15.8439	15.4169	15.2546	13.543	13.5209	-	19.0312	18.6513	19.1748	19.0497	12.8999	13.5875	12.149
Monolepta sp. 12 BOR/COL 09201	22.1703	22.5895	19.0863	16.8816	20.1835	19.3964	18.6874	19.3964	18.7425	19.1548	18.9482	18.7425	19.1548	17.2445	18.2501	16.5333	18.8287	20.2292	19.6475	18.4753	18.4753	19.0312	-	20.668	20.2938	20.8777	19.0026	17.4733	17.441
Monolepta sp. 14 BOR/COL 09418	24.17	23.913	18.0377	18.4749	17.8336	20.2914	19.9067	20.0199	19.8815	20.368	19.7125	19.644	19.644	18.356	19.2506	20.8068	20.1525	21.5831	21.0009	16.7257	16.6976	18.6513	20.668	-	-	-	18.1474	16.2472	17.336
Monolepta sp. 14 BOR/COL 09556	23.9123	23.7364	17.8752	18.4867	18.0663	20.5931	19.7219	20.1694	20.062	20.0231	19.6442	19.6099	19.8161	18.6037	19.487	20.7937	20.481	22.1462	21.5424	16.8224	16.7934	19.1748	20.2938	-	-	-	18.6288	16.3283	17.7878
Monolepta sp. 14 BOR/COL 09557	24.5982	24.3441	17.8421	18.8749	18.225	20.2914	20.1285	20.0199	19.8815	20.368	19.7125	19.644	19.644	18.7521	19.6555	20.6023	20.1525	21.5831	21.0009	17.111	17.0822	19.0497	20.8777	-	-	-	18.3478	16.6348	17.5324
Monolepta sp. 15 BOR/COL 08456	18.6816	18.5143	14.1296	12.4886	10.0207	12.1449	12.2312	12.1449	11.7845	12.0435	12.2051	11.6053	12.326	15.2575	13.0763	13.7856	13.2236	13.2036	13.3858	14.1145	14.1145	12.8999	19.0026	18.1474	18.6288	18.3478	-	11.7754	13.8071
Monolepta sp. 17 BOR/COL 09449	19.6308	19.2935	10.4174	9.56556	12.4951	11.1497	10.9928	11.5418	10.938	11.4193	10.6914	10.938	10.7628	14.9013	11.4029	12.711	13.6304	14.3094	14.3331	11.9795	11.9795	13.5875	17.4733	16.2472	16.3283	16.6348	11.7754	-	12.3449
Monolepta sp. 18 BOR/COL 09679	22.1085	22.6565	14.1885	12.0481	13.4395	14.8678	14.9448	14.9671	14.4483	14.7549	14.3587	14.1709	14.3537	16.5712	13.7407	13.3313	14.3649	14.4575	13.9319	14.2505	14.2038	12.149	17.441	17.336	17.7878	17.5324	13.8071	12.3449	-
Distance range	9.57 % - 24.60 %
Mean Inter-sp distance	0.158843

## Sheet: Notosacantha
Interspecific distance for genus Notosacantha (%)
	Notosacantha sp. 1 BOR/COL 08312	Notosacantha sp. 2 BOR/COL 08540
Notosacantha sp. 1 BOR/COL 08312	-	14.1367
Notosacantha sp. 2 BOR/COL 08540	14.1367	-
Distance range	0.141367
Mean Inter-sp distance	0.141367

## Sheet: Rhyparida
Interspecific distance for genus Rhyparida (%)
	Rhyparida sp. 1 BOR/COL 08063	Rhyparida sp. 1 BOR/COL 08355	Rhyparida sp. 1 BOR/COL 08422	Rhyparida sp. 1 BOR/COL 08450	Rhyparida sp. 1 BOR/COL 08470	Rhyparida sp. 1 BOR/COL 08508	Rhyparida sp. 2 BOR/COL 08262
Rhyparida sp. 1 BOR/COL 08063	-	-	-	-	-	-	17.0866
Rhyparida sp. 1 BOR/COL 08355	-	-	-	-	-	-	17.6155
Rhyparida sp. 1 BOR/COL 08422	-	-	-	-	-	-	17.7894
Rhyparida sp. 1 BOR/COL 08450	-	-	-	-	-	-	14.6155
Rhyparida sp. 1 BOR/COL 08470	-	-	-	-	-	-	17.3438
Rhyparida sp. 1 BOR/COL 08508	-	-	-	-	-	-	17.0057
Rhyparida sp. 2 BOR/COL 08262	17.0866	17.6155	17.7894	14.6155	17.3438	17.0057	-
Distance range	14.62 % - 17.79 %
Mean Inter-sp distance	0.169094
