# Supplementary material for: Investigating leaf beetles (Coleoptera, Chrysomelidae) on the west coast islands of Sabah via checklist-taking and DNA barcoding
Source: PeerJ. 2018 Oct 25;6:e5811. doi: 10.7717/peerj.5811 (PMC6204241; doi:10.7717/peerj.5811)
Supplement: Supplemental Information 6 [file peerj-06-5811-s006.xlsx]

## Sheet: BLAST search-hit table
Document Name	Sequence Name	Type	Name	Sequence	Minimum	Min (with gaps)	Min (original sequence)	Maximum	Max (with gaps)	Max (original sequence)	Length	Length (with gaps)	# Intervals	Direction	# Nucleotide Sequences With Mates	# Nucleotides	# Sequences	% Identical Sites	% Pairwise Identity	%GC	Accession	Bit-Score	Database	E Value	First Residues	Free end gaps	Grade	Hit end	Hit start	Max Sequence Length	Mean Coverage	Min Sequence Length	Modified	Molecule Type	Organism	Original Query Frame	Query	Query coverage	Query end	Query start	Ref Seq Index	Ref Seq Length	Sequence Length	Topology
Altica aenea C8071	KX778628	Search Hit	Search Hit	ATTTGAGCAGGAATAATTGGTACTTCTATAAGACTTTTAATTCGAACTGAGTTAGGAAACCCCGGTTCATTAATTGGGAATGATCAAATTTATAATGTAATTGTTACTGCCCATGCCTTTATTATAATTTTCTTTATAGTAATACCCATAATAATTGGAGGTTTTGGAAACTGATTAGTCCCTTTAATAATTGGGGCCCCTGATATAGCTTTCCCTCGAATAAATAATATAAGATTCTGGTTACTCCCACCATCAATTTTTTTATTATTAATAAGAAGGTTAACAGAAAGAGGAGCAGGAACTGGATGAACGGTTTATCCCCCCCTATCATCCAATCTTGCCCATAATGGACCATCTGTGGATTTAGCTATTTTTAGCCTTCATTTAGCAGGAATTTCA…	1	23	1	616	638	616	616	616	1	forward	0	1232	2	0.992	0.992	0.344	KX778628	1110.96	nr	0	ATTTGAGCAGGAATAATTGGTACTTCTATAAGACTTTTAATTCGAACTGAGTTAGGAAACCCCGGTTCATTAATTGGGAATGATCAAATTTATAATGTAATTGTTACTGCCCATGCCTTTATTATAATTTTCTTTATAGTAATACCCATAATAATTGGAGGTTTTGGAAACTGATTAGTCCCTTTAATAATTGGGGCCCCTGATATAGCTTTCCCTCGAATAAATAATATAAGATTCTGGTTACTCCCACCATCAATTTTTTTATTATTAATAAGAAGGTTAACAGAAAGAGGAGCAGGAACTGGATGAACGGTTTATCCCCCCCTATCATCCAATCTTGCCCATAATGGACCATCTGTGGATTTAGCTATTTTTAGCCTTCATTTAGCAGGAATTTCA…	TRUE	0.962	616	1	616	2	616	Fri Aug 04 11:37:07 SGT 2017	DNA	Altica birmanensis	1	Altica aenea C8071	0.9319	638	23	-1	0	616	linear
Altica aenea C8166	KX778636	Search Hit	Search Hit	ATAATTGGTACTTCTATAAGACTTTTAATTCGAACTGAGTTAGGAAACCCCGGTTCATTAATTGGGAATGATCAAATTTATAATGTAATTGTTACTGCCCATGCCTTTATTATAATTTTCTTTATAGTAATACCCATAATAATTGGAGGTTTTGGAAACTGATTAGT-CCCTTTAATAATTGGGGCCCCTGATATAGCTTTCCCTCGAATAAATAATATAAGATTCTGGTTACTCCCGCCATCAATTTTTTTATTATTAATAAGAAGGTTAACAGAAAGAGGAGCAGGAACTGGATGAACGGTTTATCCCCCCCTATCATCCAATCTTGCCCATAATGGACCATCTGTGGATTTAGCTATTTTTAGCCTTCATTTAGCAGGAATTTCATCAATTCTAGG…	1	44	1	603	647	603	603	604	1	forward	0	1206	2	0.99	0.99	0.345	KX778636	1081.41	nr	0	ATAATTGGTACTTCTATAAGACTTTTAATTCGAACTGAGTTAGGAAACCCCGGTTCATTAATTGGGAATGATCAAATTTATAATGTAATTGTTACTGCCCATGCCTTTATTATAATTTTCTTTATAGTAATACCCATAATAATTGGAGGTTTTGGAAACTGATTAGTCCCTTTAATAATTGGGGCCCCTGATATAGCTTTCCCTCGAATAAATAATATAAGATTCTGGTTACTCCCGCCATCAATTTTTTTATTATTAATAAGAAGGTTAACAGAAAGAGGAGCAGGAACTGGATGAACGGTTTATCCCCCCCTATCATCCAATCTTGCCCATAATGGACCATCTGTGGATTTAGCTATTTTTAGCCTTCATTTAGCAGGAATTTCATCAATTCTAGGT…	TRUE	0.944	603	1	603	2	603	Fri Aug 04 11:37:07 SGT 2017	DNA	Altica engstroemi	1	Altica aenea C8166	0.8987	646	44	-1	0	603	linear
Aphthona sp. C9602	KF654954	Search Hit	Search Hit	TTATACTTTATTTTTGGAATTTGATCAGGAATAATTGGAACTTCATTAAGAATTTTAATTCGTACTGAATTAGGAAACCCTGGATCATTAATTGGAAATAATCAAATTTATAATGTTATCGTTACAGCTCATGCTTTTATTATAATTTTTTTTATAGTAATACCAATTATAATTGGAGGATTTGGAAATTGATTAGTCCCCTTAATAATTGGAGCCCCTGATATAGCCTTCCCCCGAATAAATAATATAAGATTTTGATTATTACCCCCCTCTTTATTCTTATTAGTAATAAGAAGCATAGTAGAAAGAGGAGCAGGAACTGGATGAACTGTTTATCCTCCCCTTTCTTCAAATATTGCTCATGGAGGATCTTCTGTTGATCTAGCAATTTTTAGATTA…	1	5	2	647	651	648	647	647	1	forward	0	1294	2	0.886	0.886	0.304	KF654954	785.946	nr	0	TTATACTTTATTTTTGGAATTTGATCAGGAATAATTGGAACTTCATTAAGAATTTTAATTCGTACTGAATTAGGAAACCCTGGATCATTAATTGGAAATAATCAAATTTATAATGTTATCGTTACAGCTCATGCTTTTATTATAATTTTTTTTATAGTAATACCAATTATAATTGGAGGATTTGGAAATTGATTAGTCCCCTTAATAATTGGAGCCCCTGATATAGCCTTCCCCCGAATAAATAATATAAGATTTTGATTATTACCCCCCTCTTTATTCTTATTAGTAATAAGAAGCATAGTAGAAAGAGGAGCAGGAACTGGATGAACTGTTTATCCTCCCCTTTCTTCAAATATTGCTCATGGAGGATCTTCTGTTGATCTAGCAATTTTTAGATTA…	TRUE	0.931	648	2	647	2	647	Fri Aug 04 11:37:07 SGT 2017	DNA	Longitarsus candidulus	1	Aphthona sp. C9602	0.9773	651	5	-1	0	647	linear
Argopistes sp. 1 C8442	AB794741	Search Hit	Search Hit	AACCTTATATTTTATTTTTGGAATTTGAGCAGGAATAGTTGGAACATCTTTAAGAATTCTAATTCGAACAGAATTAGGAAGCCCTGGCTCATTAATTGGAAATGATCAAATTTATAATGTAATTGTCACAGCCCATGCATTTATTATAATTTTTTTTATAGTTATACCTATTATAATTGGTGGATTTGGAAATTGACTTGTCCCATTAATAATTGGAGCCCCTGATATAGCTTTTCCTCGAATAAATAATATAAGATTTTGATTATTGCCCCCATCATTATTTTTATTAATTATAAGAAGAATTGTTGAAAGAGGTGCTGGGACAGGATGAACTGTTTATCCTCCTTTATCTTCTAATATTGCCCATGGAGGTGCTTCTGTAGATTTAGCAATTTTTAG…	1	1	1	658	659	658	658	659	1	forward	0	1316	2	0.863	0.863	0.301	AB794741	717.62	nr	0	AACCTTATATTTTATTTTTGGAATTTGAGCAGGAATAGTTGGAACATCTTTAAGAATTCTAATTCGAACAGAATTAGGAAGCCCTGGCTCATTAATTGGAAATGATCAAATTTATAATGTAATTGTCACAGCCCATGCATTTATTATAATTTTTTTTATAGTTATACCTATTATAATTGGTGGATTTGGAAATTGACTTGTCCCATTAATAATTGGAGCCCCTGATATAGCTTTTCCTCGAATAAATAATATAAGATTTTGATTATTGCCCCCATCATTATTTTTATTAATTATAAGAAGAATTGTTGAAAGAGGTGCTGGGACAGGATGAACTGTTTATCCTCCTTTATCTTCTAATATTGCCCATGGAGGTGCTTCTGTAGATTTAGCAATTTTTAG…	TRUE	0.929	658	1	658	2	658	Fri Aug 04 11:37:07 SGT 2017	DNA	Monolepta sp.	1	Argopistes sp. 1 C8442	0.994	658	1	-1	0	659	linear
Argopistes sp. 2 C9608	KF134547	Search Hit	Search Hit	TATATTTTATTTTTGGAATTTGAGCAGGAATAATTGGAACCTC-CTTAAGAATTTTAATTCGAACAGAATTAGGAAACCCCGGTTCCTTAATTGGAAATGATCAAATTTATAATGTTATTGTAACTGCCCATGCATTCATTATAATTTTTTTTATAGTAATACCAATTATAATTGGAGGGTTTGGAAACTGATTAGTACCCCTAATAATCGGTGCCCCAGATATAGCCTTTCCTCGAATAAATAATATAAGATTTTGATTATTACCCCCATCTTTATTTTTATTAGTAATAAGAAGAATAGTAGAAAGTGGAGCTGGAACTGGCTGAACTGTTTACCCTCCTTTATCTTCAAATATTGCTCATGGTGGATCCTCTGTTGATTTAGCAATTTTTAGTTTA…	1	6	3	652	659	654	652	654	1	forward	0	1304	2	0.862	0.862	0.314	KF134547	706.54	nr	0	TATATTTTATTTTTGGAATTTGAGCAGGAATAATTGGAACCTCCTTAAGAATTTTAATTCGAACAGAATTAGGAAACCCCGGTTCCTTAATTGGAAATGATCAAATTTATAATGTTATTGTAACTGCCCATGCATTCATTATAATTTTTTTTATAGTAATACCAATTATAATTGGAGGGTTTGGAAACTGATTAGTACCCCTAATAATCGGTGCCCCAGATATAGCCTTTCCTCGAATAAATAATATAAGATTTTGATTATTACCCCCATCTTTATTTTTATTAGTAATAAGAAGAATAGTAGAAAGTGGAGCTGGAACTGGCTGAACTGTTTACCCTCCTTTATCTTCAAATATTGCTCATGGTGGATCCTCTGTTGATTTAGCAATTTTTAGTTTAC…	TRUE	0.924	654	3	652	2	652	Fri Aug 04 11:37:07 SGT 2017	DNA	Longitarsus atricillus	1	Argopistes sp. 2 C9608	0.9864	657	6	-1	0	654	linear
Aulacophora sp. C8103	KC185693	Search Hit	Search Hit	AACTTTATATTTTATTTTTGGTATTTGAGCCGGAATAGTTGGAACTTCTTTAAGAATTTTAATTCGAGCTGAATTAGGGAGACCTGGATCACTAATTGGTAATGACCAAATTTATAATGTTATTGTAACAGCCCATGCATTCATTATAATTTTTTTCATAGTTATACCAATCATAATTGGAGGATTTGGAAATTGATTAATCCCTTTAATAATTGGTGCTCCTGATATAGCATTCCCTCGAATAAATAATATAAGATTTTGATTATTACCCCCATCTCTATTTTTATTAATCATAAGAAGAATTATTGAAAATGGAGCTGGAACAGGATGAACAGTTTATCCCCCACTTTCATCTAATATTACCCATAGAGGAGCCTCAGTAGATTTAGCAATTTTTAG…	1		18	662		679	662		1	forward	0	1324	2	0.897	0.897	0.313	KC185693	846.886	nr	0	AACTTTATATTTTATTTTTGGTATTTGAGCCGGAATAGTTGGAACTTCTTTAAGAATTTTAATTCGAGCTGAATTAGGGAGACCTGGATCACTAATTGGTAATGACCAAATTTATAATGTTATTGTAACAGCCCATGCATTCATTATAATTTTTTTCATAGTTATACCAATCATAATTGGAGGATTTGGAAATTGATTAATCCCTTTAATAATTGGTGCTCCTGATATAGCATTCCCTCGAATAAATAATATAAGATTTTGATTATTACCCCCATCTCTATTTTTATTAATCATAAGAAGAATTATTGAAAATGGAGCTGGAACAGGATGAACAGTTTATCCCCCACTTTCATCTAATATTACCCATAGAGGAGCCTCAGTAGATTTAGCAATTTTTAG…	TRUE	0.949	679	18	662	2	662	Fri Aug 04 11:37:09 SGT 2017	DNA	Atrachya sp.	1	Aulacophora sp. C8103	1	662	1	-1	0	662	linear
Basilepta sp. 1 C8202	KF946257	Search Hit	Search Hit	TTCATTTTCGGAGCTTGATCAAGTATAGTAGGTACTTCTTTAAGACTCCTAATTCGAGTTGAATTAGGAAGACCAGGAACATGAATTGGAAATGACCAAATTTATAACACTATTGTAACAGCACATGCATTTATCATAATTTTTTTTATAGTTATACCAATTATAATTGGAGGATTTGGAAATTGATTAGTACCTTTAATATTAGGAGCCCCCGACATAGCATTTCCACGAATAAACAATATAAGATTTTGGTTATTGCCCCCATCATTAACCTTATTAATTATAAGTAGAATTGTAGAAAATGGAGTAGGAACAGGCTGAACAGTTTACCCCCCCTTATCAGCCAATATTGCCCATAGAGGATCTAGTGTTGATTTAGCAATTTTTAGTCTCCATTTA…	1	11	1	648	658	648	648	648	1	forward	0	1296	2	0.869	0.869	0.321	KF946257	726.854	nr	0	TTCATTTTCGGAGCTTGATCAAGTATAGTAGGTACTTCTTTAAGACTCCTAATTCGAGTTGAATTAGGAAGACCAGGAACATGAATTGGAAATGACCAAATTTATAACACTATTGTAACAGCACATGCATTTATCATAATTTTTTTTATAGTTATACCAATTATAATTGGAGGATTTGGAAATTGATTAGTACCTTTAATATTAGGAGCCCCCGACATAGCATTTCCACGAATAAACAATATAAGATTTTGGTTATTGCCCCCATCATTAACCTTATTAATTATAAGTAGAATTGTAGAAAATGGAGTAGGAACAGGCTGAACAGTTTACCCCCCCTTATCAGCCAATATTGCCCATAGAGGATCTAGTGTTGATTTAGCAATTTTTAGTCTCCATTTA…	TRUE	0.924	648	1	648	2	648	Fri Aug 04 11:37:05 SGT 2017	DNA	Eumolpinae sp.	1	Basilepta sp. 1 C8202	0.9789	658	11	-1	0	648	linear
Basilepta sp. 2 C6930	KX781753	Search Hit	Search Hit	AACGTTATATTTTATTTTTGGAGCTTGAGCCGGAATAGTAGGAACCTCCCTAAGACTATTAATTCGAATCGAACTTGGAAATCCAGGAACTTTAATTGGAAATGATCAAATTTATAATACAATTGTAACAGCCCACGCTTTTATTATAATTTTCTTTATGGTAATACCAATTATAATTGGTGGATTTGGTAATTGATTAGTACCATTAATGCTAGGTGCTCCCGACATAGCATTCCCACGAATAAATAATATAAGATTTTGGCTTCTACCACCTTCTTTAACCCTCCTAATTATAAGAAGAATTGTAGAAAATGGGGTCGGAACAGGATGAACTGTTTACCCGCCACTTTCAGCTAATATTGCACATAGAGGTTCTAGAGTAGATCTGGCTATTTTTAG…	1	1	3	657	658	659	657	658	1	forward	0	1315	2	0.871	0.871	0.342	KX781753	743.473	nr	0	AACGTTATATTTTATTTTTGGAGCTTGAGCCGGAATAGTAGGAACCTCCCTAAGACTATTAATTCGAATCGAACTTGGAAATCCAGGAACTTTAATTGGAAATGATCAAATTTATAATACAATTGTAACAGCCCACGCTTTTATTATAATTTTCTTTATGGTAATACCAATTATAATTGGTGGATTTGGTAATTGATTAGTACCATTAATGCTAGGTGCTCCCGACATAGCATTCCCACGAATAAATAATATAAGATTTTGGCTTCTACCACCTTCTTTAACCCTCCTAATTATAAGAAGAATTGTAGAAAATGGGGTCGGAACAGGATGAACTGTTTACCCGCCACTTTCAGCTAATATTGCACATAGAGGTTCTAGAGTAGATCTGGCTATTTTTAG…	TRUE	0.932	659	3	658	2	657	Fri Aug 04 11:37:05 SGT 2017	DNA	Chrysomelidae sp.	1	Basilepta sp. 2 C6930	0.994	658	1	-1	0	658	linear
Basilepta sp. 3 C8379	KF946194	Search Hit	Search Hit	TTTATTTTTGGAGCCTGAGCAGGAATAGTTGGTACCTCCCTAAGACTACTAATCCGAATTGAATTAGGTAATCCAGGAACCTTAATTGGAAACGATCAAATTTATAATACCATTGTAACTGCTCATGCCTTTATTATAATTTTTTTTATAGTAATACCAATCATAATTGGGGGATTCGGAAATTGATTAGTCCCCCTAATACTAGGAGCACCAGATATAGCATTTCCTCGAATAAATAATATAAGATTTTGATTACTCCCCCCATCATTAACTTTATTAATTATAAGAAGAATTGTTGAAAACGGTGTAGGAACTGGATGAACTGTTTATCCCCCCCTTTCTGCTAATATTGCCCATAGAGGTTCAAGAGTAGATTTAGCTATTTTCAGCCTACATTTA…	1	11	1	648	661	648	648	651	1	forward	0	1296	2	0.848	0.848	0.338	KF946194	649.294	nr	0	TTTATTTTTGGAGCCTGAGCAGGAATAGTTGGTACCTCCCTAAGACTACTAATCCGAATTGAATTAGGTAATCCAGGAACCTTAATTGGAAACGATCAAATTTATAATACCATTGTAACTGCTCATGCCTTTATTATAATTTTTTTTATAGTAATACCAATCATAATTGGGGGATTCGGAAATTGATTAGTCCCCCTAATACTAGGAGCACCAGATATAGCATTTCCTCGAATAAATAATATAAGATTTTGATTACTCCCCCCATCATTAACTTTATTAATTATAAGAAGAATTGTTGAAAACGGTGTAGGAACTGGATGAACTGTTTATCCCCCCCTTTCTGCTAATATTGCCCATAGAGGTTCAAGAGTAGATTTAGCTATTTTCAGCCTACATTTA…	TRUE	0.914	648	1	648	2	648	Fri Aug 04 11:37:05 SGT 2017	DNA	Eumolpinae sp.	1	Basilepta sp. 3 C8379	0.9803	658	11	-1	0	651	linear
Basilepta sp. 4 C8064	KF946194	Search Hit	Search Hit	TTTATTTTTGGAGCCTGAGCAGGAATAGTTGGTACCTCCCTAAGACTACTAATCCGAATTGAATTAGGTAATCCAGGAACCTTAATTGGAAACGATCAAATTTATAATACCATTGTAACTGCTCATGCCTTTATTATAATTTTTTTTATAGTAATACCAATCATAATTGGGGGATTCGGAAATTGATTAGTCCCCCTAATACTAGGAGCACCAGATATAGCATTTCCTCGAATAAATAATATAAGATTTTGATTACTCCCCCCATCATTAACTTTATTAATTATAAGAAGAATTGTTGAAAACGGTGTAGGAACTGGATGAACTGTTTATCCCCCCCTTTCTGCTAATATTGCCCATAGAGGTTCAAGAGTAGATTTAGCTATTTTCAGCCTACATTTA…	1	11	1	648	658	648	648	648	1	forward	0	1296	2	0.855	0.855	0.338	KF946194	676.994	nr	0	TTTATTTTTGGAGCCTGAGCAGGAATAGTTGGTACCTCCCTAAGACTACTAATCCGAATTGAATTAGGTAATCCAGGAACCTTAATTGGAAACGATCAAATTTATAATACCATTGTAACTGCTCATGCCTTTATTATAATTTTTTTTATAGTAATACCAATCATAATTGGGGGATTCGGAAATTGATTAGTCCCCCTAATACTAGGAGCACCAGATATAGCATTTCCTCGAATAAATAATATAAGATTTTGATTACTCCCCCCATCATTAACTTTATTAATTATAAGAAGAATTGTTGAAAACGGTGTAGGAACTGGATGAACTGTTTATCCCCCCCTTTCTGCTAATATTGCCCATAGAGGTTCAAGAGTAGATTTAGCTATTTTCAGCCTACATTTA…	TRUE	0.917	648	1	648	2	648	Fri Aug 04 11:37:05 SGT 2017	DNA	Eumolpinae sp.	1	Basilepta sp. 4 C8064	0.9789	658	11	-1	0	648	linear
Brontispa longissima C8054	JQ302136	Search Hit	Search Hit	ACATTATACTTCATCTTTGGATTTTGATCAGGCATAGTAGGAACATCACTCAGGGTCTTAATTCGAACTGAACTTGGAAACCCTGGATCATTAATTGGAAATGATCAAATTTATAATGTCATTGTAACTGCCCACGCATTCATTATAATTTTCTTCATAGTTATGCCAACCTTAATTGGAGGATTCGGAAACTGATTAGTGCCCCTGATAATTGGAGCACCTGATATAGCCTTCCCCCGGCTAAATAATATAAGATTCTGACTTCTTCCCCCTTCTTTATCCTTACTTCTCCTTAGAAGAATGAGAGAAAGAGGAGCTGGAACCGGTTGAACAGTATATCCCCCACTCTCAGCCAATATTGCCCATAGAGGAGCTTCAGTAGACCTCGCAATTTTTAGG…	1	2	1	657	658	657	657	657	1	forward	0	1314	2	1	1	0.387	JQ302136	1214.37	nr	0	ACATTATACTTCATCTTTGGATTTTGATCAGGCATAGTAGGAACATCACTCAGGGTCTTAATTCGAACTGAACTTGGAAACCCTGGATCATTAATTGGAAATGATCAAATTTATAATGTCATTGTAACTGCCCACGCATTCATTATAATTTTCTTCATAGTTATGCCAACCTTAATTGGAGGATTCGGAAACTGATTAGTGCCCCTGATAATTGGAGCACCTGATATAGCCTTCCCCCGGCTAAATAATATAAGATTCTGACTTCTTCCCCCTTCTTTATCCTTACTTCTCCTTAGAAGAATGAGAGAAAGAGGAGCTGGAACCGGTTGAACAGTATATCCCCCACTCTCAGCCAATATTGCCCATAGAGGAGCTTCAGTAGACCTCGCAATTTTTAGG…	TRUE	0.997	657	1	657	2	657	Fri Aug 04 11:37:04 SGT 2017	DNA	Brontispa longissima	1	Brontispa longissima C8054	0.9939	658	2	-1	0	657	linear
Brontispa longissima C8397	JQ302136	Search Hit	Search Hit	ACATTATACTTCATCTTTGGATTTTGATCAGGCATAGTAGGAACATCACTCAGGGTCTTAATTCGAACTGAACTTGGAAACCCTGGATCATTAATTGGAAATGATCAAATTTATAATGTCATTGTAACTGCCCACGCATTCATTATAATTTTCTTCATAGTTATGCCAACCTTAATTGGAGGATTCGGAAACTGATTAGTGCCCCTGATAATTGGAGCACCTGATATAGCCTTCCCCCGGCTAAATAATATAAGATTCTGACTTCTTCCCCCTTCTTTATCCTTACTTCTCCTTAGAAGAATGAGAGAAAGAGGAGCTGGAACCGGTTGAACAGTATATCCCCCACTCTCAGCCAATATTGCCCATAGAGGAGCTTCAGTAGACCTCGCAATTTTTAGG…	1	2	1	657	658	657	657	657	1	forward	0	1314	2	1	1	0.387	JQ302136	1214.37	nr	0	ACATTATACTTCATCTTTGGATTTTGATCAGGCATAGTAGGAACATCACTCAGGGTCTTAATTCGAACTGAACTTGGAAACCCTGGATCATTAATTGGAAATGATCAAATTTATAATGTCATTGTAACTGCCCACGCATTCATTATAATTTTCTTCATAGTTATGCCAACCTTAATTGGAGGATTCGGAAACTGATTAGTGCCCCTGATAATTGGAGCACCTGATATAGCCTTCCCCCGGCTAAATAATATAAGATTCTGACTTCTTCCCCCTTCTTTATCCTTACTTCTCCTTAGAAGAATGAGAGAAAGAGGAGCTGGAACCGGTTGAACAGTATATCCCCCACTCTCAGCCAATATTGCCCATAGAGGAGCTTCAGTAGACCTCGCAATTTTTAGG…	TRUE	0.996	657	1	657	2	657	Fri Aug 04 11:37:04 SGT 2017	DNA	Brontispa longissima	1	Brontispa longissima C8397	0.9924	658	2	-1	0	657	linear
Brontispa longissima sp C8453	JQ302136	Search Hit	Search Hit	ACATTATACTTCATCTTTGGATTTTGATCAGGCATAGTAGGAACATCACTCAGGGTCTTAATTCGAACTGAACTTGGAAACCCTGGATCATTAATTGGAAATGATCAAATTTATAATGTCATTGTAACTGCCCACGCATTCATTATAATTTTCTTCATAGTTATGCCAACCTTAATTGGAGGATTCGGAAACTGATTAGTGCCCCTGATAATTGGAGCACCTGATATAGCCTTCCCCCGGCTAAATAATATAAGATTCTGACTTCTTCCCCCTTCTTTATCCTTACTTCTCCTTAGAAGAATGAGAGAAAGAGGAGCTGGAACCGGTTGAACAGTATATCCCCCACTCTCAGCCAATATTGCCCATAGAGGAGCTTCAGTAGACCTCGCAATTTTTAGG…	1	2	1	655	656	655	655	655	1	forward	0	1310	2	1	1	0.386	JQ302136	1210.68	nr	0	ACATTATACTTCATCTTTGGATTTTGATCAGGCATAGTAGGAACATCACTCAGGGTCTTAATTCGAACTGAACTTGGAAACCCTGGATCATTAATTGGAAATGATCAAATTTATAATGTCATTGTAACTGCCCACGCATTCATTATAATTTTCTTCATAGTTATGCCAACCTTAATTGGAGGATTCGGAAACTGATTAGTGCCCCTGATAATTGGAGCACCTGATATAGCCTTCCCCCGGCTAAATAATATAAGATTCTGACTTCTTCCCCCTTCTTTATCCTTACTTCTCCTTAGAAGAATGAGAGAAAGAGGAGCTGGAACCGGTTGAACAGTATATCCCCCACTCTCAGCCAATATTGCCCATAGAGGAGCTTCAGTAGACCTCGCAATTTTTAGG…	TRUE	0.998	655	1	655	2	655	Fri Aug 04 11:37:04 SGT 2017	DNA	Brontispa longissima	1	Brontispa longissima sp C8453	0.997	656	2	-1	0	655	linear
Cleorina malayana C9597	KF946194	Search Hit	Search Hit	TTTATTTTTGGAGCCTGAGCAGGAATAGTTGGTACCTCCCTAAGACTACTAATCCGAATTGAATTAGGTAATCCAGGAACCTTAATTGGAAACGATCAAATTTATAATACCATTGTAACTGCTCATGCCTTTATTATAATTTTTTTTATAGTAATACCAATCATAATTGGGGGATTCGGAAATTGATTAGTCCCCCTAATACTAGGAGCACCAGATATAGCATTTCCTCGAATAAATAATATAAGATTTTGATTACTCCCCCCATCATTAACTTTATTAATTATAAGAAGAATTGTTGAAAACGGTGTAGGAACTGGATGAACTGTTTATCCCCCCCTTTCTGCTAATATTGCCCATAGAGGTTCAAGAGTAGATTTAGCTATTTTCAGCCTACATTTA…	1	11	1	648	658	648	648	648	1	forward	0	1296	2	0.875	0.875	0.338	KF946194	749.013	nr	0	TTTATTTTTGGAGCCTGAGCAGGAATAGTTGGTACCTCCCTAAGACTACTAATCCGAATTGAATTAGGTAATCCAGGAACCTTAATTGGAAACGATCAAATTTATAATACCATTGTAACTGCTCATGCCTTTATTATAATTTTTTTTATAGTAATACCAATCATAATTGGGGGATTCGGAAATTGATTAGTCCCCCTAATACTAGGAGCACCAGATATAGCATTTCCTCGAATAAATAATATAAGATTTTGATTACTCCCCCCATCATTAACTTTATTAATTATAAGAAGAATTGTTGAAAACGGTGTAGGAACTGGATGAACTGTTTATCCCCCCCTTTCTGCTAATATTGCCCATAGAGGTTCAAGAGTAGATTTAGCTATTTTCAGCCTACATTTA…	TRUE	0.927	648	1	648	2	648	Fri Aug 04 11:37:05 SGT 2017	DNA	Eumolpinae sp.	1	Cleorina malayana C9597	0.9789	658	11	-1	0	648	linear
Clitena sp. C8399	KC185760	Search Hit	Search Hit	CTTTATATTTTATTTTTGGTATTTGATCAGGAATAGTAGGAACATCTTTAAGAATACTAATTCGAACTGAATTAGGAAATCCTGGTTCTTTAATTGGAAATGATCAAATTTATAATGTAATTGTTACTGCTCATGCTTTCATCATAATTTTTTTTATAGTTATACCTATTATAATTGGAGGTTTTGGAAACTGATTAGTTCCTCTTATAATTGGAGCTCCTGATATAGCTTTTCCTCGAATAAATAATATAAGATTTTGACTTTTACCCCCATCATTATTTTTATTATTAATAAGAAGAATAGTTGAAAGAGGTGCAGGTACAGGATGAACGGTTTATCCCCCCCTTTCATCAAATATTGCACATAATGGAGCCTCAGTAGACTTAGCAATTTTTAGTC…	1		20	657		676	657		1	forward	0	1314	2	0.9	0.9	0.295	KC185760	848.732	nr	0	CTTTATATTTTATTTTTGGTATTTGATCAGGAATAGTAGGAACATCTTTAAGAATACTAATTCGAACTGAATTAGGAAATCCTGGTTCTTTAATTGGAAATGATCAAATTTATAATGTAATTGTTACTGCTCATGCTTTCATCATAATTTTTTTTATAGTTATACCTATTATAATTGGAGGTTTTGGAAACTGATTAGTTCCTCTTATAATTGGAGCTCCTGATATAGCTTTTCCTCGAATAAATAATATAAGATTTTGACTTTTACCCCCATCATTATTTTTATTATTAATAAGAAGAATAGTTGAAAGAGGTGCAGGTACAGGATGAACGGTTTATCCCCCCCTTTCATCAAATATTGCACATAATGGAGCCTCAGTAGACTTAGCAATTTTTAGTC…	TRUE	0.95	676	20	657	2	657	Fri Aug 04 11:37:07 SGT 2017	DNA	Clitea fulva	1	Clitena sp. C8399	1	657	1	-1	0	657	linear
Colaspoides sp. 1 C9398	KJ677941	Search Hit	Search Hit	AACTTTATACTTTATCTTTGGAGCATGATCTGGAATACTAGGAACATCATTAAGAATATTAATTCGAGTTGAACTAGGAAACCCTGGAATATTTATTGGAAATGACCAAATTTATAATTCAATTGTTACAGCTCATGCTTTTATTATAATTTTTTTTATAGTTATACCAATTATAATTGGAGGATTTGGAAATTGACTTGTACCCCTAATACTTGGAGCACCTGATATAGCATTCCCTCGTATAAACAACATAAGATTTTGGTTGCTGCCCCCTTCCTTAAATCTTTTAGTTATAAGAAGAATTGTTGAAACAGGAGTAGGAACAGGATGGACAGTTTATCCACCCCTTTCT-T-CAAATGTTGCTCACAGAGGATCTTCAGTTGACTTAGCAATTTTT…	1	1	1	651	653	651	651	653	1	forward	0	1302	2	0.841	0.841	0.332	KJ677941	627.135	nr	1.54e-175	AACTTTATACTTTATCTTTGGAGCATGATCTGGAATACTAGGAACATCATTAAGAATATTAATTCGAGTTGAACTAGGAAACCCTGGAATATTTATTGGAAATGACCAAATTTATAATTCAATTGTTACAGCTCATGCTTTTATTATAATTTTTTTTATAGTTATACCAATTATAATTGGAGGATTTGGAAATTGACTTGTACCCCTAATACTTGGAGCACCTGATATAGCATTCCCTCGTATAAACAACATAAGATTTTGGTTGCTGCCCCCTTCCTTAAATCTTTTAGTTATAAGAAGAATTGTTGAAACAGGAGTAGGAACAGGATGGACAGTTTATCCACCCCTTTCTTCAAATGTTGCTCACAGAGGATCTTCAGTTGACTTAGCAATTTTTAG…	TRUE	0.912	651	1	651	2	651	Fri Aug 04 11:37:05 SGT 2017	DNA	Eumolpinae sp.	1	Colaspoides sp. 1 C9398	0.9834	651	1	-1	0	653	linear
Colaspoides tuberculata C9858	KR424893	Search Hit	Search Hit	AACATTATATTTCATTTTTGGTGCATGATCAGGAATACTTGGAACATCTTTAAGTATACTAATTCGTGTTGAATTAGGAAATCCTGATACT-TTTATTGGAAATGATCAAATTTATAATTCAATCGTCACAGCCCATGCTTTTATCATAATTTTTTTTATAGTTATACCAATTATAATTGGTGGATTTGGAAACTGGCTTGTACCTTTAATATTAGGAGCCCCGGATATAGCATTTCCTCGAATAAACAATATAAGATTTTGACTGCTGCCCCCGTCATTAAATCTTTTGGTTATAAGAAGAATTGTTGAAAATGGAGTAGGAACCGGATGAACAGTTTATCCACCTCTTTCATCAAATGTGGCCCATAGAGGGTCATCCGTAGACCTAGCAATCTTTA…	1	1	1	658	659	658	658	659	1	forward	0	1316	2	0.832	0.832	0.34	KR424893	601.281	nr	9.3e-168	AACATTATATTTCATTTTTGGTGCATGATCAGGAATACTTGGAACATCTTTAAGTATACTAATTCGTGTTGAATTAGGAAATCCTGATACTTTTATTGGAAATGATCAAATTTATAATTCAATCGTCACAGCCCATGCTTTTATCATAATTTTTTTTATAGTTATACCAATTATAATTGGTGGATTTGGAAACTGGCTTGTACCTTTAATATTAGGAGCCCCGGATATAGCATTTCCTCGAATAAACAATATAAGATTTTGACTGCTGCCCCCGTCATTAAATCTTTTGGTTATAAGAAGAATTGTTGAAAATGGAGTAGGAACCGGATGAACAGTTTATCCACCTCTTTCATCAAATGTGGCCCATAGAGGGTCATCCGTAGACCTAGCAATCTTTAG…	TRUE	0.913	658	1	658	2	658	Fri Aug 04 11:37:05 SGT 2017	DNA	Eumolpinae sp.	1	Colaspoides tuberculata C9858	0.994	658	1	-1	0	659	linear
Colasposoma auripenne C9753	LN995410	Search Hit	Search Hit	AACATTATATTTTGTTTTTGGAGCCTGATCAGGAATAGTAGGAACATCCCTAAGCCTATTAATTCGAATCGAATTAGGAAATCCAGGAACTTTAATTGGTAACGATCAAATTTATAATACTATTGTTACCGCTCATGCTTTTATTATAATTTTCTTTATAGTAATACCAATTATAATCGGAGGATTTGGAAATTGACTTGTCCCTTTAATACTCGGAGCACCTGATATAGCTTTCCCTCGTTTAAATAATATAAGATTTTGACTTTTACCTCCTTCTTTAACTTTATTAATTATAAGAAGAATTGTAGAAAGAGGAGTAGGAACAGGTTGAACAGTTTATCCACCCTTATCTTCGAATATTGCTCACAGAGGATCAAGAGTTGATTTAGCCATCTTTAG…	1	1	1	658	658	658	658	658	1	forward	0	1316	2	0.918	0.918	0.315	LN995410	917.059	nr	0	AACATTATATTTTGTTTTTGGAGCCTGATCAGGAATAGTAGGAACATCCCTAAGCCTATTAATTCGAATCGAATTAGGAAATCCAGGAACTTTAATTGGTAACGATCAAATTTATAATACTATTGTTACCGCTCATGCTTTTATTATAATTTTCTTTATAGTAATACCAATTATAATCGGAGGATTTGGAAATTGACTTGTCCCTTTAATACTCGGAGCACCTGATATAGCTTTCCCTCGTTTAAATAATATAAGATTTTGACTTTTACCTCCTTCTTTAACTTTATTAATTATAAGAAGAATTGTAGAAAGAGGAGTAGGAACAGGTTGAACAGTTTATCCACCCTTATCTTCGAATATTGCTCACAGAGGATCAAGAGTTGATTTAGCCATCTTTAG…	TRUE	0.957	658	1	658	2	658	Fri Aug 04 11:37:05 SGT 2017	DNA	Colasposoma dauricum	1	Colasposoma auripenne C9753	0.997	658	1	-1	0	658	linear
Dactylispa sp. 1 C9777	KM253781	Search Hit	Search Hit	AACTTTATATTTTATTTTTGGTATTTGATCAGGAATAGTAGGAACATCATTAAGATTGTTAATTCGAGCTGAATTAGGAAATCCTGGTTCATTAATTGGAGATGATCAAATTTATAATACTATTGTAACAGCTCATGCTTTTATTATAATTTTTTTTATAGTTATACCTATTATAATTGGAGGATTTGGTAATTGATTAGTTCCCCTAATATTAGGGGCACCAGATATAGCTTTCCCACGACTTAATAATATAAGATTTTGACTGCTTCCTCCATC-ATTAATTTTATTAATTTCAAGAAGAGTAGTAGAAAATGGAGCAGGAACAGGATGAACTGTTTACCCCCCTCTCTCATCTAATATTGCTCATGGAGGTAG-ATCTGTAGATTTAGCTATTTTT…	1	1	1	655	661	655	655	661	1	forward	0	1310	2	0.834	0.834	0.298	KM253781	601.281	nr	9.3e-168	AACTTTATATTTTATTTTTGGTATTTGATCAGGAATAGTAGGAACATCATTAAGATTGTTAATTCGAGCTGAATTAGGAAATCCTGGTTCATTAATTGGAGATGATCAAATTTATAATACTATTGTAACAGCTCATGCTTTTATTATAATTTTTTTTATAGTTATACCTATTATAATTGGAGGATTTGGTAATTGATTAGTTCCCCTAATATTAGGGGCACCAGATATAGCTTTCCCACGACTTAATAATATAAGATTTTGACTGCTTCCTCCATCATTAATTTTATTAATTTCAAGAAGAGTAGTAGAAAATGGAGCAGGAACAGGATGAACTGTTTACCCCCCTCTCTCATCTAATATTGCTCATGGAGGTAGATCTGTAGATTTAGCTATTTTTTC…	TRUE	0.917	655	1	655	2	655	Fri Aug 04 11:37:04 SGT 2017	DNA	Callisto basistrigella	1	Dactylispa sp. 1 C9777	1	655	1	-1	0	661	linear
Dactylispa sp. 2 C8305	AB794736	Search Hit	Search Hit	AACCTTATATTTTATTTTTGGAATTTGAGCAGGAATAGTAGGAACATCTTTAAGAATATTAATTCGAACAGAATTAGGAAGACCAGGCTCATTAATTGGTAATGATCAAATTTATAATGTAATTGTAACAGCCCATGCATTTATTATAATTTTTTTTATAGTTATACCAATTATAATTGGTGGTTTTGGAAATTGACTTGTCCCATTAATAATTGGTGCCCCTGATATAGCTTTTCCTCGAATAAATAATATAAGATTTTGATTATTGCCCCCATC-ATTATTTTTATTAATTATAAGAAGAATTGTTGAAAGAGGAGCTGGAACAGGATGAACTGTTTACCCTCCTTTATCCTCAAATATTGCTCATGGAGGAGCCTCTGTAGATTTAGCTATTTTTA…	1	1	1	658	661	658	658	661	1	forward	0	1316	2	0.829	0.829	0.302	AB794736	590.202	nr	2.01e-164	AACCTTATATTTTATTTTTGGAATTTGAGCAGGAATAGTAGGAACATCTTTAAGAATATTAATTCGAACAGAATTAGGAAGACCAGGCTCATTAATTGGTAATGATCAAATTTATAATGTAATTGTAACAGCCCATGCATTTATTATAATTTTTTTTATAGTTATACCAATTATAATTGGTGGTTTTGGAAATTGACTTGTCCCATTAATAATTGGTGCCCCTGATATAGCTTTTCCTCGAATAAATAATATAAGATTTTGATTATTGCCCCCATCATTATTTTTATTAATTATAAGAAGAATTGTTGAAAGAGGAGCTGGAACAGGATGAACTGTTTACCCTCCTTTATCCTCAAATATTGCTCATGGAGGAGCCTCTGTAGATTTAGCTATTTTTAG…	TRUE	0.914	658	1	658	2	658	Fri Aug 04 11:37:04 SGT 2017	DNA	Monolepta sp.	1	Dactylispa sp. 2 C8305	0.9985	658	1	-1	0	661	linear
Dercetina sp. C8428	KC135967	Search Hit	Search Hit	AACTTTATATTTTATTTTTGGAATTTGAGCTGGAATGGTTGGAACTTCTCTAAGAATTTTAATTCGAACAGAATTAGGAAGACCAGGTTCATTAATTGGAAATGATCAAATTTATAATGTCATTGTTACAGCTCATGCATTTATTATAATTTTCTTTATAGTAATACCAATTATAATTGGTGGATTCGGAAATTGGTTAGTTCCATTAATAATTGGAGCTCCTGATATAGCTTTTCCTCGAATAAATAATATAAGATTTTGATTGTTGCCCCCATCATTATTTTTATTAATTATAAGAAGAATTGTTGAAAGAGGAGCAGGAACAGGATGAACTGTTTATCCTCCATTATCATCTAATATTGCTCATGGAGGAGCTTCTGTAGATTTAGCAATTTTTAG…	1	1	1	658	658	658	658	658	1	forward	0	1316	2	0.889	0.889	0.289	KC135967	811.799	nr	0	AACTTTATATTTTATTTTTGGAATTTGAGCTGGAATGGTTGGAACTTCTCTAAGAATTTTAATTCGAACAGAATTAGGAAGACCAGGTTCATTAATTGGAAATGATCAAATTTATAATGTCATTGTTACAGCTCATGCATTTATTATAATTTTCTTTATAGTAATACCAATTATAATTGGTGGATTCGGAAATTGGTTAGTTCCATTAATAATTGGAGCTCCTGATATAGCTTTTCCTCGAATAAATAATATAAGATTTTGATTGTTGCCCCCATCATTATTTTTATTAATTATAAGAAGAATTGTTGAAAGAGGAGCAGGAACAGGATGAACTGTTTATCCTCCATTATCATCTAATATTGCTCATGGAGGAGCTTCTGTAGATTTAGCAATTTTTAG…	TRUE	0.944	658	1	658	2	658	Fri Aug 04 11:37:11 SGT 2017	DNA	Monolepta quadriguttata	1	Dercetina sp. C8428	0.9985	658	1	-1	0	658	linear
Dercetina sp. C8150	KC185693	Search Hit	Search Hit	AACTTTATATTTTATTTTTGGTATTTGAGCCGGAATAGTTGGAACTTCTTTAAGAATTTTAATTCGAGCTGAATTAGGGAGACCTGGATCACTAATTGGTAATGACCAAATTTATAATGTTATTGTAACAGCCCATGCATTCATTATAATTTTTTTCATAGTTATACCAATCATAATTGGAGGATTTGGAAATTGATTAATCCCTTTAATAATTGGTGCTCCTGATATAGCATTCCCTCGAATAAATAATATAAGATTTTGATTATTACCCCCATCTCTATTTTTATTAATCATAAGAAGAATTATTGAAAATGGAGCTGGAACAGGATGAACAGTTTATCCCCCACTTTCATCTAATATTACCCATAGAGGAGCCTCAGTAGATTTAGCAATTTTTAG…	1	1	18	662	664	679	662	664	1	forward	0	1324	2	0.892	0.892	0.313	KC185693	824.726	nr	0	AACTTTATATTTTATTTTTGGTATTTGAGCCGGAATAGTTGGAACTTCTTTAAGAATTTTAATTCGAGCTGAATTAGGGAGACCTGGATCACTAATTGGTAATGACCAAATTTATAATGTTATTGTAACAGCCCATGCATTCATTATAATTTTTTTCATAGTTATACCAATCATAATTGGAGGATTTGGAAATTGATTAATCCCTTTAATAATTGGTGCTCCTGATATAGCATTCCCTCGAATAAATAATATAAGATTTTGATTATTACCCCCATCTCTATTTTTATTAATCATAAGAAGAATTATTGAAAATGGAGCTGGAACAGGATGAACAGTTTATCCCCCACTTTCATCTAATATTACCCATAGAGGAGCCTCAGTAGATTTAGCAATTTTTAG…	TRUE	0.946	679	18	662	2	662	Fri Aug 04 11:37:11 SGT 2017	DNA	Atrachya sp.	1	Dercetina sp. C8150	1	662	1	-1	0	664	linear
Erystus villicus C8134	KF654096	Search Hit	Search Hit	TATACTTCATTTTCGGAATTTGAGCCGGAATAGTAGGAACTTCCTTAAGAATTTTAATTCGTACAGAATTAGGAAATCCAGGATCTTTAATTGGAAATGACCAAATTTATAATGTTATTGTTACAGCCCATGCTTTTATTATAATTTTTTTTATAGTTATACCAATTATAATTGGAGGATTTGGAAATTGATTAGTACCTTTAATAATTGGAGCCCCTGATATAGCTTTCCCTCGAATAAATAATATAAGATTTTGA-TTATTACCCCCATCTTTATTT-TTATTAGTAATAAGAAGAATAGTAGAAAGAGGAGCAGGAACTGGATGAACAGTTTACCCCCCATTATCCTCTAATATTGCCCATGGAGGTTCATCTGTTGATTTAGCAATTTTTAGATT…	1	6	3	653	660	655	653	655	1	forward	0	1306	2	0.878	0.878	0.309	KF654096	763.787	nr	0	TATACTTCATTTTCGGAATTTGAGCCGGAATAGTAGGAACTTCCTTAAGAATTTTAATTCGTACAGAATTAGGAAATCCAGGATCTTTAATTGGAAATGACCAAATTTATAATGTTATTGTTACAGCCCATGCTTTTATTATAATTTTTTTTATAGTTATACCAATTATAATTGGAGGATTTGGAAATTGATTAGTACCTTTAATAATTGGAGCCCCTGATATAGCTTTCCCTCGAATAAATAATATAAGATTTTGATTATTACCCCCATCTTTATTTTTATTAGTAATAAGAAGAATAGTAGAAAGAGGAGCAGGAACTGGATGAACAGTTTACCCCCCATTATCCTCTAATATTGCCCATGGAGGTTCATCTGTTGATTTAGCAATTTTTAGATTAC…	TRUE	0.932	655	3	653	2	653	Fri Aug 04 11:37:08 SGT 2017	DNA	Longitarsus tabidus	1	Erystus villicus C8134	0.9864	658	6	-1	0	655	linear
genus indet. nr. Monolepta C9875	KC185734	Search Hit	Search Hit	AACTTTATATTTCATTTTTGGTGTATGAGCAGGAATAGTTGGAACTTCATTAAGAATTTTAATTCGAGCTGAATTAGGAAGACCTGGATCATTAATTGGAAATGATCAAATTTATAATGTAATTGTTACAGCACATGCATTTATTATAATTTTTTTTATAGTTATACCAATTATAATTGGAGGATTTGGAAATTGATTAGTTCCTCTAATAATTGGAGCCCCTGATATAGCTTTTCCTCGAATAAATAATATAAGATTTTGACTTCTCCCCCCGTCTTTATTTTTATTAATTATAAGAAGAGTTGTTGAAAGAGGAGCAGGAACAGGATGAACAGTTTACCCCCCACTTTCATCC---AATATTGCTCATGGAGGAGCATCTGTTGACTTAGCAATTTT…	1	1	18	662	666	679	662	666	1	forward	0	1324	2	0.881	0.881	0.313	KC185734	785.946	nr	0	AACTTTATATTTCATTTTTGGTGTATGAGCAGGAATAGTTGGAACTTCATTAAGAATTTTAATTCGAGCTGAATTAGGAAGACCTGGATCATTAATTGGAAATGATCAAATTTATAATGTAATTGTTACAGCACATGCATTTATTATAATTTTTTTTATAGTTATACCAATTATAATTGGAGGATTTGGAAATTGATTAGTTCCTCTAATAATTGGAGCCCCTGATATAGCTTTTCCTCGAATAAATAATATAAGATTTTGACTTCTCCCCCCGTCTTTATTTTTATTAATTATAAGAAGAGTTGTTGAAAGAGGAGCAGGAACAGGATGAACAGTTTACCCCCCACTTTCATCCAATATTGCTCATGGAGGAGCATCTGTTGACTTAGCAATTTTTAG…	TRUE	0.941	679	18	662	2	662	Fri Aug 04 11:37:12 SGT 2017	DNA	Monolepta longitarsoides	1	genus indet. nr. Monolepta C9875	1	662	1	-1	0	666	linear
genus indet. nr. Monolepta C9893	KC185734	Search Hit	Search Hit	AACTTTATATTTCATTTTTGGTGTATGAGCAGGAATAGTTGGAACTTCATTAAGAATTTTAATTCGAGCTGAATTAGGAAGACCTGGATCATTAATTGGAAATGATCAAATTTATAATGTAATTGTTACAGCACATGCATTTATTATAATTTTTTTTATAGTTATACCAATTATAATTGGAGGATTTGGAAATTGATTAGTTCCTCTAATAATTGGAGCCCCTGATATAGCTTTTCCTCGAATAAATAATATAAGATTTTGACTTCTCCCCCCGTCTTTATTTTTATTAATTATAAGAAGAGTTGTTGAAAGAGGAGCAGGAACAGGATGAACAGTTTACCCCCCACTTTCATCC---AATATTGCTCATGGAGGAGCATCTGTTGACTTAGCAATTTT…	1	1	18	662	666	679	662	666	1	forward	0	1324	2	0.881	0.881	0.313	KC185734	785.946	nr	0	AACTTTATATTTCATTTTTGGTGTATGAGCAGGAATAGTTGGAACTTCATTAAGAATTTTAATTCGAGCTGAATTAGGAAGACCTGGATCATTAATTGGAAATGATCAAATTTATAATGTAATTGTTACAGCACATGCATTTATTATAATTTTTTTTATAGTTATACCAATTATAATTGGAGGATTTGGAAATTGATTAGTTCCTCTAATAATTGGAGCCCCTGATATAGCTTTTCCTCGAATAAATAATATAAGATTTTGACTTCTCCCCCCGTCTTTATTTTTATTAATTATAAGAAGAGTTGTTGAAAGAGGAGCAGGAACAGGATGAACAGTTTACCCCCCACTTTCATCCAATATTGCTCATGGAGGAGCATCTGTTGACTTAGCAATTTTTAG…	TRUE	0.941	679	18	662	2	662	Fri Aug 04 11:37:12 SGT 2017	DNA	Monolepta longitarsoides	1	genus indet. nr. Monolepta C9893	1	662	1	-1	0	666	linear
genus indet. nr. Monolepta C8277	KC185734	Search Hit	Search Hit	AACTTTATATTTCATTTTTGGTGTATGAGCAGGAATAGTTGGAACTTCATTAAGAATTTTAATTCGAGCTGAATTAGGAAGACCTGGATCATTAATTGGAAATGATCAAATTTATAATGTAATTGTTACAGCACATGCATTTATTATAATTTTTTTTATAGTTATACCAATTATAATTGGAGGATTTGGAAATTGATTAGTTCCTCTAATAATTGGAGCCCCTGATATAGCTTTTCCTCGAATAAATAATATAAGATTTTGACTTCTCCCCCCGTCTTTATTTTTATTAATTATAAGAAGAGTTGTTGAAAGAGGAGCAGGAACAGGATGAACAGTTTACCCCCCACTTTCATCC---AATATTGCTCATGGAGGAGCATCTGTTGACTTAGCAATTTT…	1	1	18	662	666	679	662	666	1	forward	0	1324	2	0.881	0.881	0.313	KC185734	785.946	nr	0	AACTTTATATTTCATTTTTGGTGTATGAGCAGGAATAGTTGGAACTTCATTAAGAATTTTAATTCGAGCTGAATTAGGAAGACCTGGATCATTAATTGGAAATGATCAAATTTATAATGTAATTGTTACAGCACATGCATTTATTATAATTTTTTTTATAGTTATACCAATTATAATTGGAGGATTTGGAAATTGATTAGTTCCTCTAATAATTGGAGCCCCTGATATAGCTTTTCCTCGAATAAATAATATAAGATTTTGACTTCTCCCCCCGTCTTTATTTTTATTAATTATAAGAAGAGTTGTTGAAAGAGGAGCAGGAACAGGATGAACAGTTTACCCCCCACTTTCATCCAATATTGCTCATGGAGGAGCATCTGTTGACTTAGCAATTTTTAG…	TRUE	0.941	679	18	662	2	662	Fri Aug 04 11:37:07 SGT 2017	DNA	Monolepta longitarsoides	1	genus indet. nr. Monolepta C8277	1	662	1	-1	0	666	linear
Gonophora sp. C8016	KP253547	Search Hit	Search Hit	TATATTTTATCTTTGGAATTTGAGCTGGTATAATTGGTACTTCTTTAAGATTATTAATTCGAGCTGAATTAGGAAACCCTGGATCTTTAATTGGA-GATGATCAAATTTATAATACTATTGTAACTGCTCATGCTTTTATTATAATTTTTTTTATAGTAATACCTATTATAATTGGAGGATTTGGAAATTGATTAGTACCTTTAATATTAGGAGCTCCTGACATAGCCTTCCCCCGAATAAATAATATAAGATTTTGATTATTACCCCCATCTATTATACTTT-TAATTTCAAGTAGAATTGTAGAAAATGGAGCAGGTACAGGATGAACAGTATACCCCCCACTTTCATCTAATATTGCCCATAGAGGAAGTTCTGTTGACCTAGCTATTTTTTCATT…	1	6	6	652	661	657	652	656	1	forward	0	1304	2	0.838	0.838	0.299	KP253547	617.901	nr	9.24e-173	TATATTTTATCTTTGGAATTTGAGCTGGTATAATTGGTACTTCTTTAAGATTATTAATTCGAGCTGAATTAGGAAACCCTGGATCTTTAATTGGAGATGATCAAATTTATAATACTATTGTAACTGCTCATGCTTTTATTATAATTTTTTTTATAGTAATACCTATTATAATTGGAGGATTTGGAAATTGATTAGTACCTTTAATATTAGGAGCTCCTGACATAGCCTTCCCCCGAATAAATAATATAAGATTTTGATTATTACCCCCATCTATTATACTTTTAATTTCAAGTAGAATTGTAGAAAATGGAGCAGGTACAGGATGAACAGTATACCCCCCACTTTCATCTAATATTGCCCATAGAGGAAGTTCTGTTGACCTAGCTATTTTTTCATTAC…	TRUE	0.915	657	6	652	2	652	Fri Aug 04 11:37:04 SGT 2017	DNA	Epinotia nigricana	1	Gonophora sp. C8016	0.9924	657	6	-1	0	656	linear
Gonophora sp. C8260 CO1	LC049959	Search Hit	Search Hit	TATATTTTATTTTTGGAATTTGAGCAGGAATAGTAGGAACTTCTTTAAGTTTATTAATTCGAGCAGAATTAGGAAACCCTGGTTCTTTAATTGGA-GATGATCAAATTTATAATACAATTGTTACAGCTCATGCATTTATTATAATTTTTTTTATAGTTATACCTATTATAATTGGTGGATTTGGAAATTGATTAGTACCTTTAATATTAGGAGCCCCTGATATAGCTTTCCCCCGAATAAATAATATAAGATTTTGATTATTACCTCCTTCTTTAATATTATTAATTTCTAGTAGTATTGTGGAAAACGGAGCAGGTACTGGTTGAACAGTTTATCCCCCCCTTTCATCAAATATCGCTCACAGAGGAAGTTCAGTTGATTTAGCTATTTTTTCTTTA…	1	6	44	657	665	700	657	660	1	forward	0	1314	2	0.841	0.841	0.283	LC049959	632.674	nr	3.3e-177	TATATTTTATTTTTGGAATTTGAGCAGGAATAGTAGGAACTTCTTTAAGTTTATTAATTCGAGCAGAATTAGGAAACCCTGGTTCTTTAATTGGAGATGATCAAATTTATAATACAATTGTTACAGCTCATGCATTTATTATAATTTTTTTTATAGTTATACCTATTATAATTGGTGGATTTGGAAATTGATTAGTACCTTTAATATTAGGAGCCCCTGATATAGCTTTCCCCCGAATAAATAATATAAGATTTTGATTATTACCTCCTTCTTTAATATTATTAATTTCTAGTAGTATTGTGGAAAACGGAGCAGGTACTGGTTGAACAGTTTATCCCCCCCTTTCATCAAATATCGCTCACAGAGGAAGTTCAGTTGATTTAGCTATTTTTTCTTTAC…	TRUE	0.917	700	44	657	2	657	Fri Aug 04 11:37:04 SGT 2017	DNA	Agrius convolvuli	1	Gonophora sp. C8260 CO1	0.9924	662	6	-1	0	660	linear
Gonophora sp. C8344	LC049959	Search Hit	Search Hit	TATATTTTATTTTTGGAATTTGAGCAGGAATAGTAGGAACTTCTTTAAGTTTATTAATTCGAGCAGAATTAGGAAACCCTGGTTCTTTAATTGGA-GATGATCAAATTTATAATACAATTGTTACAGCTCATGCATTTATTATAATTTTTTTTATAGTTATACCTATTATAATTGGTGGATTTGGAAATTGATTAGTACCTTTAATATTAGGAGCCCCTGATATAGCTTTCCCCCGAATAAATAATATAAGATTTTGATTATTACCTCCTTCTTTAATATTATTAATTTCTAGTAGTATTGTGGAAAACGGAGCAGGTACTGGTTGAACAGTTTATCCCCCCCTTTCATCAAATATCGCTCACAGAGGAAGTTCAGTTGATTTAGCTATTTTTTCTTTA…	1	6	44	657	665	700	657	660	1	forward	0	1314	2	0.841	0.841	0.283	LC049959	632.674	nr	3.3e-177	TATATTTTATTTTTGGAATTTGAGCAGGAATAGTAGGAACTTCTTTAAGTTTATTAATTCGAGCAGAATTAGGAAACCCTGGTTCTTTAATTGGAGATGATCAAATTTATAATACAATTGTTACAGCTCATGCATTTATTATAATTTTTTTTATAGTTATACCTATTATAATTGGTGGATTTGGAAATTGATTAGTACCTTTAATATTAGGAGCCCCTGATATAGCTTTCCCCCGAATAAATAATATAAGATTTTGATTATTACCTCCTTCTTTAATATTATTAATTTCTAGTAGTATTGTGGAAAACGGAGCAGGTACTGGTTGAACAGTTTATCCCCCCCTTTCATCAAATATCGCTCACAGAGGAAGTTCAGTTGATTTAGCTATTTTTTCTTTAC…	TRUE	0.917	700	44	657	2	657	Fri Aug 04 11:37:04 SGT 2017	DNA	Agrius convolvuli	1	Gonophora sp. C8344	0.9924	662	6	-1	0	660	linear
Gonophora sp. C8423	LC049959	Search Hit	Search Hit	TATATTTTATTTTTGGAATTTGAGCAGGAATAGTAGGAACTTCTTTAAGTTTATTAATTCGAGCAGAATTAGGAAACCCTGGTTCTTTAATTGGA-GATGATCAAATTTATAATACAATTGTTACAGCTCATGCATTTATTATAATTTTTTTTATAGTTATACCTATTATAATTGGTGGATTTGGAAATTGATTAGTACCTTTAATATTAGGAGCCCCTGATATAGCTTTCCCCCGAATAAATAATATAAGATTTTGATTATTACCTCCTTCTTTAATATTATTAATTTCTAGTAGTATTGTGGAAAACGGAGCAGGTACTGGTTGAACAGTTTATCCCCCCCTTTCATCAAATATCGCTCACAGAGGAAGTTCAGTTGATTTAGCTATTTTTTCTTTA…	1	6	44	657	665	700	657	660	1	forward	0	1314	2	0.841	0.841	0.283	LC049959	632.674	nr	3.3e-177	TATATTTTATTTTTGGAATTTGAGCAGGAATAGTAGGAACTTCTTTAAGTTTATTAATTCGAGCAGAATTAGGAAACCCTGGTTCTTTAATTGGAGATGATCAAATTTATAATACAATTGTTACAGCTCATGCATTTATTATAATTTTTTTTATAGTTATACCTATTATAATTGGTGGATTTGGAAATTGATTAGTACCTTTAATATTAGGAGCCCCTGATATAGCTTTCCCCCGAATAAATAATATAAGATTTTGATTATTACCTCCTTCTTTAATATTATTAATTTCTAGTAGTATTGTGGAAAACGGAGCAGGTACTGGTTGAACAGTTTATCCCCCCCTTTCATCAAATATCGCTCACAGAGGAAGTTCAGTTGATTTAGCTATTTTTTCTTTAC…	TRUE	0.917	700	44	657	2	657	Fri Aug 04 11:37:04 SGT 2017	DNA	Agrius convolvuli	1	Gonophora sp. C8423	0.9924	662	6	-1	0	660	linear
Hoplosaenidea malayensis C8425	KC255439	Search Hit	Search Hit	ACTTTATATTTTATTTTTGGAATATGAGCAGGAATAATCGGAACTTCAATAAGCATATTAATTCGAGTAGAATTAGGTAACCCAGGATCATTAATTGGCAATGACCAAATTTATAATGTTATTGTCACAGCCCATGCTTTTGTCATAATTTTTTTTATAGTAATACCTATTATAATTGGTGGATTTGGAAACTGATTAGTTCCTCTAATAATCGGAGCCCCAGATATAGCATTTCCCCGAATGAATAATATAAGATTTTGACTTTTACCACCTAGATTATTTTTACTAATTATAAGAAGAACCGTAGAAAGAGGGGTAGGAACGGGCTGAACCGTTTACCCTCCATTATCAGCAAATATTGCTCACAGCGGAGCCTCTGTAGATCTAGCTATTTTTAGT…	1	2	19	660	663	678	660	662	1	forward	0	1320	2	0.878	0.878	0.336	KC255439	771.173	nr	0	ACTTTATATTTTATTTTTGGAATATGAGCAGGAATAATCGGAACTTCAATAAGCATATTAATTCGAGTAGAATTAGGTAACCCAGGATCATTAATTGGCAATGACCAAATTTATAATGTTATTGTCACAGCCCATGCTTTTGTCATAATTTTTTTTATAGTAATACCTATTATAATTGGTGGATTTGGAAACTGATTAGTTCCTCTAATAATCGGAGCCCCAGATATAGCATTTCCCCGAATGAATAATATAAGATTTTGACTTTTACCACCTAGATTATTTTTACTAATTATAAGAAGAACCGTAGAAAGAGGGGTAGGAACGGGCTGAACCGTTTACCCTCCATTATCAGCAAATATTGCTCACAGCGGAGCCTCTGTAGATCTAGCTATTTTTAGT…	TRUE	0.938	678	19	660	2	660	Fri Aug 04 11:37:08 SGT 2017	DNA	Hoplosaenidea subcostata	1	Hoplosaenidea malayensis C8425	0.9985	661	2	-1	0	662	linear
Hoplosaenidea malayensis C8330	KC255439	Search Hit	Search Hit	ACTTTATATTTTATTTTTGGAATATGAGCAGGAATAATCGGAACTTCAATAAGCATATTAATTCGAGTAGAATTAGGTAACCCAGGATCATTAATTGGCAATGACCAAATTTATAATGTTATTGTCACAGCCCATGCTTTTGTCATAATTTTTTTTATAGTAATACCTATTATAATTGGTGGATTTGGAAACTGATTAGTTCCTCTAATAATCGGAGCCCCAGATATAGCATTTCCCCGAATGAATAATATAAGATTTTGACTTTTACCACCTAGATTATTTTTACTAATTATAAGAAGAACCGTAGAAAGAGGGGTAGGAACGGGCTGAACCGTTTACCCTCCATTATCAGCAAATATTGCTCACAGCGGAGCCTCTGTAGATCTAGCTATTTTTAGT…	1	2	19	661	664	679	661	663	1	forward	0	1322	2	0.879	0.879	0.336	KC255439	778.56	nr	0	ACTTTATATTTTATTTTTGGAATATGAGCAGGAATAATCGGAACTTCAATAAGCATATTAATTCGAGTAGAATTAGGTAACCCAGGATCATTAATTGGCAATGACCAAATTTATAATGTTATTGTCACAGCCCATGCTTTTGTCATAATTTTTTTTATAGTAATACCTATTATAATTGGTGGATTTGGAAACTGATTAGTTCCTCTAATAATCGGAGCCCCAGATATAGCATTTCCCCGAATGAATAATATAAGATTTTGACTTTTACCACCTAGATTATTTTTACTAATTATAAGAAGAACCGTAGAAAGAGGGGTAGGAACGGGCTGAACCGTTTACCCTCCATTATCAGCAAATATTGCTCACAGCGGAGCCTCTGTAGATCTAGCTATTTTTAGT…	TRUE	0.939	679	19	661	2	661	Fri Aug 04 11:37:08 SGT 2017	DNA	Hoplosaenidea subcostata	1	Hoplosaenidea malayensis C8330	0.9985	662	2	-1	0	663	linear
Hoplosaenidea malayensis C8440	KC255439	Search Hit	Search Hit	ACTTTATATTTTATTTTTGGAATATGAGCAGGAATAATCGGAACTTCAATAAGCATATTAATTCGAGTAGAATTAGGTAACCCAGGATCATTAATTGGCAATGACCAAATTTATAATGTTATTGTCACAGCCCATGCTTTTGTCATAATTTTTTTTATAGTAATACCTATTATAATTGGTGGATTTGGAAACTGATTAGTTCCTCTAATAATCGGAGCCCCAGATATAGCATTTCCCCGAATGAATAATATAAGATTTTGACTTTTACCACCTAGATTATTTTTACTAATTATAAGAAGAACCGTAGAAAGAGGGGTAGGAACGGGCTGAACCGTTTACCCTCCATTATCAGCAAATATTGCTCACAGCGGAGCCTCTGTAGATCTAGCTATTTTTAGT…	1	2	19	661	664	679	661	663	1	forward	0	1322	2	0.878	0.878	0.336	KC255439	773.02	nr	0	ACTTTATATTTTATTTTTGGAATATGAGCAGGAATAATCGGAACTTCAATAAGCATATTAATTCGAGTAGAATTAGGTAACCCAGGATCATTAATTGGCAATGACCAAATTTATAATGTTATTGTCACAGCCCATGCTTTTGTCATAATTTTTTTTATAGTAATACCTATTATAATTGGTGGATTTGGAAACTGATTAGTTCCTCTAATAATCGGAGCCCCAGATATAGCATTTCCCCGAATGAATAATATAAGATTTTGACTTTTACCACCTAGATTATTTTTACTAATTATAAGAAGAACCGTAGAAAGAGGGGTAGGAACGGGCTGAACCGTTTACCCTCCATTATCAGCAAATATTGCTCACAGCGGAGCCTCTGTAGATCTAGCTATTTTTAGT…	TRUE	0.938	679	19	661	2	661	Fri Aug 04 11:37:08 SGT 2017	DNA	Hoplosaenidea subcostata	1	Hoplosaenidea malayensis C8440	0.9985	662	2	-1	0	663	linear
Hoplosaenidea sp. 2 C8538	KC255439	Search Hit	Search Hit	ACTTTATATTTTATTTTTGGAATATGAGCAGGAATAATCGGAACTTCAATAAGCATATTAATTCGAGTAGAATTAGGTAACCCAGGATCATTAATTGGCAATGACCAAATTTATAATGTTATTGTCACAGCCCATGCTTTTGTCATAATTTTTTTTATAGTAATACCTATTATAATTGGTGGATTTGGAAACTGATTAGTTCCTCTAATAATCGGAGCCCCAGATATAGCATTTCCCCGAATGAATAATATAAGATTTTGACTTTTACCACCTAGATTATTTTTACTAATTATAAGAAGAACCGTAGAAAGAGGGGTAGGAACGGGCTGAACCGTTTACCCTCCATTATCAGCAAATATTGCTCACAGCGGAGCCTCTGTAGATCTAGCTATTTTTAGT…	1	2	19	659	660	677	659	659	1	forward	0	1318	2	0.903	0.903	0.337	KC255439	863.506	nr	0	ACTTTATATTTTATTTTTGGAATATGAGCAGGAATAATCGGAACTTCAATAAGCATATTAATTCGAGTAGAATTAGGTAACCCAGGATCATTAATTGGCAATGACCAAATTTATAATGTTATTGTCACAGCCCATGCTTTTGTCATAATTTTTTTTATAGTAATACCTATTATAATTGGTGGATTTGGAAACTGATTAGTTCCTCTAATAATCGGAGCCCCAGATATAGCATTTCCCCGAATGAATAATATAAGATTTTGACTTTTACCACCTAGATTATTTTTACTAATTATAAGAAGAACCGTAGAAAGAGGGGTAGGAACGGGCTGAACCGTTTACCCTCCATTATCAGCAAATATTGCTCACAGCGGAGCCTCTGTAGATCTAGCTATTTTTAGT…	TRUE	0.951	677	19	659	2	659	Fri Aug 04 11:37:08 SGT 2017	DNA	Hoplosaenidea subcostata	1	Hoplosaenidea sp. 2 C8538	0.9985	660	2	-1	0	659	linear
Hoplosaenidea sp. 4 C8095	KF134571	Search Hit	Search Hit	TTATATTTTATTTTTGGTATTTGAGCCGGAATAATTGGTACCTCCCTAAGAATTTTAATTCGAACAGAATTAGGAAACCCCGGTTCATTAATTGGAAATGATCAAATTTATAATGTTATTGTAACAGCCCATGCTTTTATTATAATTTTTTTCATAGTTATACCTATCATAATTGGAGGATTTGGAAACTGATTAGTTCCCCTAATAATTGGTGCCCCAGATATAGCTTTTCCCCGAATAAATAATATAAGATTTTGATTATTACCCCCATCTTTATTTTTATTAGTAATAAGAAGAATAGTAGAAAGTGGTGCTGGTACTGGATGAACCGTTTACCCTCC-CTTATCCTCAAATATTGCCCATGGTGGATCATCAGTTGATTTAGCAATTTTTAGATT…	1	5	2	654	659	655	654	655	1	forward	0	1308	2	0.84	0.84	0.321	KF134571	627.135	nr	1.54e-175	TTATATTTTATTTTTGGTATTTGAGCCGGAATAATTGGTACCTCCCTAAGAATTTTAATTCGAACAGAATTAGGAAACCCCGGTTCATTAATTGGAAATGATCAAATTTATAATGTTATTGTAACAGCCCATGCTTTTATTATAATTTTTTTCATAGTTATACCTATCATAATTGGAGGATTTGGAAACTGATTAGTTCCCCTAATAATTGGTGCCCCAGATATAGCTTTTCCCCGAATAAATAATATAAGATTTTGATTATTACCCCCATCTTTATTTTTATTAGTAATAAGAAGAATAGTAGAAAGTGGTGCTGGTACTGGATGAACCGTTTACCCTCCCTTATCCTCAAATATTGCCCATGGTGGATCATCAGTTGATTTAGCAATTTTTAGATTA…	TRUE	0.914	655	2	654	2	654	Fri Aug 04 11:37:08 SGT 2017	DNA	Longitarsus luridus	1	Hoplosaenidea sp. 4 C8095	0.9879	658	5	-1	0	655	linear
Hoplosaenidea sp. 5 C9720	KJ677800	Search Hit	Search Hit	AACTTTATATTTTATTTTTGGTGTTTGAGCTGGAATAGTAGGAACTTCTCTAAGAATTTTAATTCGAACAGAATTAGGAAGACCCGGATCACTAATTGGAAATGATCAAATTTATAATGTTATTGTAACTGCCCATGCATTCATTATAATTTTTTTCATAGTAATACCAATTATAATTGGAGGATTTGGAAATTGATTAGTTCCATTAATAATTGGTGCTCCAGATATAGCTTTTCCTCGAATAAATAATATAAGATTTTGACTTCTCCCTCCTTCATTATTTTTACTAATTATAAGAAGAGTGGTAGAAAGTGGTGCAGGAACTGGTTGAACTGTTTATCCCCCTTTATCTTCTAATATTGCCCATGGTGG-AGCTTCAGTAGATTTAGCTATTTTTA…	1	1	1	656	658	656	656	658	1	forward	0	1312	2	0.84	0.84	0.317	KJ677800	630.828	nr	1.19e-176	AACTTTATATTTTATTTTTGGTGTTTGAGCTGGAATAGTAGGAACTTCTCTAAGAATTTTAATTCGAACAGAATTAGGAAGACCCGGATCACTAATTGGAAATGATCAAATTTATAATGTTATTGTAACTGCCCATGCATTCATTATAATTTTTTTCATAGTAATACCAATTATAATTGGAGGATTTGGAAATTGATTAGTTCCATTAATAATTGGTGCTCCAGATATAGCTTTTCCTCGAATAAATAATATAAGATTTTGACTTCTCCCTCCTTCATTATTTTTACTAATTATAAGAAGAGTGGTAGAAAGTGGTGCAGGAACTGGTTGAACTGTTTATCCCCCTTTATCTTCTAATATTGCCCATGGTGGAGCTTCAGTAGATTTAGCTATTTTTAG…	TRUE	0.92	656	1	656	2	656	Fri Aug 04 11:37:08 SGT 2017	DNA	Galerucinae sp.	1	Hoplosaenidea sp. 5 C9720	1	656	1	-1	0	658	linear
Hoplosaenidea sp. 5 C9721	KJ677800	Search Hit	Search Hit	AACTTTATATTTTATTTTTGGTGTTTGAGCTGGAATAGTAGGAACTTCTCTAAGAATTTTAATTCGAACAGAATTAGGAAGACCCGGATCACTAATTGGAAATGATCAAATTTATAATGTTATTGTAACTGCCCATGCATTCATTATAATTTTTTTCATAGTAATACCAATTATAATTGGAGGATTTGGAAATTGATTAGTTCCATTAATAATTGGTGCTCCAGATATAGCTTTTCCTCGAATAAATAATATAAGATTTTGACTTCTCCCTCCTTCATTATTTTTACTAATTATAAGAAGAGTGGTAGAAAGTGGTGCAGGAACTGGTTGAACTGTTTATCCCCCTTTATCTTCTAATATTGCCCATGGTGG-AGCTTCAGTAGATTTAGCTATTTTTA…	1	1	1	651	653	651	651	653	1	forward	0	1302	2	0.841	0.841	0.32	KJ677800	627.135	nr	1.54e-175	AACTTTATATTTTATTTTTGGTGTTTGAGCTGGAATAGTAGGAACTTCTCTAAGAATTTTAATTCGAACAGAATTAGGAAGACCCGGATCACTAATTGGAAATGATCAAATTTATAATGTTATTGTAACTGCCCATGCATTCATTATAATTTTTTTCATAGTAATACCAATTATAATTGGAGGATTTGGAAATTGATTAGTTCCATTAATAATTGGTGCTCCAGATATAGCTTTTCCTCGAATAAATAATATAAGATTTTGACTTCTCCCTCCTTCATTATTTTTACTAATTATAAGAAGAGTGGTAGAAAGTGGTGCAGGAACTGGTTGAACTGTTTATCCCCCTTTATCTTCTAATATTGCCCATGGTGGAGCTTCAGTAGATTTAGCTATTTTTAG…	TRUE	0.918	651	1	651	2	651	Fri Aug 04 11:37:08 SGT 2017	DNA	Galerucinae sp.	1	Hoplosaenidea sp. 5 C9721	0.9954	651	1	-1	0	653	linear
Hoplosaenidea sp. 1 C7000	KY195975	Search Hit	Search Hit	ACTTTATATTTCATTTTTGGAGTATGAGCAGGAATAGTAGGAACATCATTAAGAATTTTAATTCGAGTAGAACTAGGAAGTCCTGGATCATTAATTGGAAATGACCAAATTTATAATGTAATTGTCACTGCCCATGCATTCATTATAATTTTTTTTATAGTTATACCAATTATAATTGGAGGATTTGGTAATTGATTAGTTCCTTTAATAATTGGAGCCCCTGATATAGCTTTTCCTCGAATAAATAATATAAGATTTTGATTATTGCCCCCTTCTTTATTTTTATTAATTATAAGAAGAATTGTGGAAAGAGGAGCAGGAACAGGATGAACAGTTTATCCCCCACTTTCATCTAATATTGCTCATGGCGGAGCATCAGTTGATTTAGCAATTTTTAGG…	1	2	1444	661	664	2104	661	663	1	forward	0	1322	2	0.864	0.864	0.318	KY195975	723.16	nr	0	ACTTTATATTTCATTTTTGGAGTATGAGCAGGAATAGTAGGAACATCATTAAGAATTTTAATTCGAGTAGAACTAGGAAGTCCTGGATCATTAATTGGAAATGACCAAATTTATAATGTAATTGTCACTGCCCATGCATTCATTATAATTTTTTTTATAGTTATACCAATTATAATTGGAGGATTTGGTAATTGATTAGTTCCTTTAATAATTGGAGCCCCTGATATAGCTTTTCCTCGAATAAATAATATAAGATTTTGATTATTGCCCCCTTCTTTATTTTTATTAATTATAAGAAGAATTGTGGAAAGAGGAGCAGGAACAGGATGAACAGTTTATCCCCCACTTTCATCTAATATTGCTCATGGCGGAGCATCAGTTGATTTAGCAATTTTTAGG…	TRUE	0.931	2104	1444	661	2	661	Fri Aug 04 11:37:11 SGT 2017	DNA	Paleosepharia posticata	1	Hoplosaenidea sp. 1 C7000	0.9985	662	2	-1	0	663	linear
Hoplosaenidea variabilis C9638	AB794770	Search Hit	Search Hit	AACTTTATATTTTATTTTTGGGATATGAGCAGGTATAATTGGAACTTCAATAAGTATATTAATTCGTGTTGAACTAGGAAGTCCTGGATCATTAATTGGAAATGATCAAATTTATAATGTTATTGTTACAGCACACGCATTTGTTATAATTTTTTTTATAGTTATACCGATTATAATTGGGGGATTTGGTAATTGATTAGTACCTTTAATAATCGGGGGCCCAGATATAGCCTTCCCTCGAATAAATAATATAAGATTTTGACTTTTGCCCCCTAGTTTATTACTACTTATTATAAGAAGAATAGTTGAAAGCGGAGTAGGAACAGGATGAACTGTATACCCTCCTTTATCATCAAATATCGCCCATAGCGGGGCCTCAGTAGACTTAGCTATTTTTAG…	1	1	1	658	658	658	658	658	1	forward	0	1316	2	0.979	0.979	0.34	AB794770	1138.66	nr	0	AACTTTATATTTTATTTTTGGGATATGAGCAGGTATAATTGGAACTTCAATAAGTATATTAATTCGTGTTGAACTAGGAAGTCCTGGATCATTAATTGGAAATGATCAAATTTATAATGTTATTGTTACAGCACACGCATTTGTTATAATTTTTTTTATAGTTATACCGATTATAATTGGGGGATTTGGTAATTGATTAGTACCTTTAATAATCGGGGGCCCAGATATAGCCTTCCCTCGAATAAATAATATAAGATTTTGACTTTTGCCCCCTAGTTTATTACTACTTATTATAAGAAGAATAGTTGAAAGCGGAGTAGGAACAGGATGAACTGTATACCCTCCTTTATCATCAAATATCGCCCATAGCGGGGCCTCAGTAGACTTAGCTATTTTTAG…	TRUE	0.986	658	1	658	2	658	Fri Aug 04 11:37:08 SGT 2017	DNA	Theopea sp.	1	Hoplosaenidea variabilis C9638	0.994	658	1	-1	0	658	linear
Hyphasis sp. C8449	AB794736	Search Hit	Search Hit	AACCTTATATTTTATTTTTGGAATTTGAGCAGGAATAGTAGGAACATCTTTAAGAATATTAATTCGAACAGAATTAGGAAGACCAGGCTCATTAATTGGTAATGATCAAATTTATAATGTAATTGTAACAGCCCATGCATTTATTATAATTTTTTTTATAGTTATACCAATTATAATTGGTGGTTTTGGAAATTGACTTGTCCCATTAATAATTGGTGCCCCTGATATAGCTTTTCCTCGAATAAATAATATAAGATTTTGATTATTGCCCCCATCATTATTTTTATTAATTATAAGAAGAATTGTTGAAAGAGGAGCTGGAACAGGATGAACTGTTTACCCTCCTTTATCCTCAAATATTGCTCATGGAGGAGCCTCTGTAGATTTAGCTATTTTTAG…	1	1	1	658	658	658	658	658	1	forward	0	1316	2	0.874	0.874	0.302	AB794736	756.4	nr	0	AACCTTATATTTTATTTTTGGAATTTGAGCAGGAATAGTAGGAACATCTTTAAGAATATTAATTCGAACAGAATTAGGAAGACCAGGCTCATTAATTGGTAATGATCAAATTTATAATGTAATTGTAACAGCCCATGCATTTATTATAATTTTTTTTATAGTTATACCAATTATAATTGGTGGTTTTGGAAATTGACTTGTCCCATTAATAATTGGTGCCCCTGATATAGCTTTTCCTCGAATAAATAATATAAGATTTTGATTATTGCCCCCATCATTATTTTTATTAATTATAAGAAGAATTGTTGAAAGAGGAGCTGGAACAGGATGAACTGTTTACCCTCCTTTATCCTCAAATATTGCTCATGGAGGAGCCTCTGTAGATTTAGCTATTTTTAG…	TRUE	0.934	658	1	658	2	658	Fri Aug 04 11:37:08 SGT 2017	DNA	Monolepta sp.	1	Hyphasis sp. C8449	0.994	658	1	-1	0	658	linear
Lanka sp. C8097	KF654864	Search Hit	Search Hit	TTATACTTTATTTTTGGTATATGATCAGGAATAGTAGGAACATCCCTAAGAATGTTAATTCGAACTGAATTAGGAAACCCAGGATCTTTAATTGGAAATGATCAAATTTATAATGTTATCGTTACAGCACATGCCTTTATTATAATTTTTTTTATAGTAATACCTATTATAATTGGGGGATTTGGAAACTGATTAGTCCCCCTAATAATTGGCGCCCCTGATATAGCTTTCCCCCGAATAAATAACATAAGATTTTGATTACTTCCCCCATCATTATTTCTTTTACTAATAAGAAGAATAGTAGAAAACGGAGCAGGAACTGGATGAACTGTATACCCCCCACTTTCATCAAATATTGCTCATAGAGGTTCTTCTGTTGATTTAGCAATTTTTAGTCTT…	1	5	2	650	655	651	650	651	1	forward	0	1300	2	0.86	0.86	0.334	KF654864	697.307	nr	0	TTATACTTTATTTTTGGTATATGATCAGGAATAGTAGGAACATCCCTAAGAATGTTAATTCGAACTGAATTAGGAAACCCAGGATCTTTAATTGGAAATGATCAAATTTATAATGTTATCGTTACAGCACATGCCTTTATTATAATTTTTTTTATAGTAATACCTATTATAATTGGGGGATTTGGAAACTGATTAGTCCCCCTAATAATTGGCGCCCCTGATATAGCTTTCCCCCGAATAAATAACATAAGATTTTGATTACTTCCCCCATCATTATTTCTTTTACTAATAAGAAGAATAGTAGAAAACGGAGCAGGAACTGGATGAACTGTATACCCCCCACTTTCATCAAATATTGCTCATAGAGGTTCTTCTGTTGATTTAGCAATTTTTAGTCTT…	TRUE	0.927	651	2	650	2	650	Fri Aug 04 11:37:08 SGT 2017	DNA	Orestia punctipennis	1	Lanka sp. C8097	0.9939	654	5	-1	0	651	linear
Lema sp. C9393	KR481201	Search Hit	Search Hit	ACTTTATACTTTATATTTGGGGCTTGATCAGGAATAGTCGGAACTTCTTTAAGAATACTAATTCGAACTGAACTAGGAAACCCTGGTTCATTAATTGGAAATGATCAAATTTATAATGTAATTGTAACTGCTCATGCTTTTATTATAATTTTTTTTATAGTAATGCCTATTATAATTGGAGGATTTGGTAACTGATTAGTACCACTAATATTAGGGGCACCTGATATAGCCTTTCCTCGTATAAATAATATAAGATTTTGACTACTTCCACCTTCTCTATCACTACTATTAATAAGAAGAATTGTAGAGAATGGGGCAGGAACTGGGTGAACTGTTTATCCGCCTTTATCTGCCAATATTTCTCATAACGGAGCTTCAGTAGATTTAGCAATTTTTAGT…	1	2	2	656	657	657	656	656	1	forward	0	1312	2	0.863	0.863	0.32	KR481201	713.927	nr	0	ACTTTATACTTTATATTTGGGGCTTGATCAGGAATAGTCGGAACTTCTTTAAGAATACTAATTCGAACTGAACTAGGAAACCCTGGTTCATTAATTGGAAATGATCAAATTTATAATGTAATTGTAACTGCTCATGCTTTTATTATAATTTTTTTTATAGTAATGCCTATTATAATTGGAGGATTTGGTAACTGATTAGTACCACTAATATTAGGGGCACCTGATATAGCCTTTCCTCGTATAAATAATATAAGATTTTGACTACTTCCACCTTCTCTATCACTACTATTAATAAGAAGAATTGTAGAGAATGGGGCAGGAACTGGGTGAACTGTTTATCCGCCTTTATCTGCCAATATTTCTCATAACGGAGCTTCAGTAGATTTAGCAATTTTTAGT…	TRUE	0.927	657	2	656	2	656	Fri Aug 04 11:37:11 SGT 2017	DNA	Lema daturaphila	1	Lema sp. C9393	0.9909	657	2	-1	0	656	linear
Metrioidea grandis C8417	KU875173	Search Hit	Search Hit	AACTTTATATTTTATTTTTGGGGCTTGAGCTGGAATAGTTGGAACATCTTTAAGAATGTTAATTCGAGCAGAATTAGGTAATCCTGGATCTTTAATTGGAGACGATCAAATTTATAATGTAATTGTAACTGCTCATGCTTTCATTATAATTTTTTTTATAGTTATACCTATTATAATTGGGGGATTTGGAAACTGATTAGTACCTTTAATACTTGGAGCACCTGATATAGCTTTTCCTCGAATAAATAATATAAGATTTTGACTTTTACCCCCATCTTTAACTTTACTCTTAATAAGAAGAATAGTAGAAAGAGGTGCAGGAACTGGATGAACAGTTTATCCCCCTCTT-TCATCTAATATTGCTCATGGAGGATCTTCAGTAGACTTAGCTATTTTTA…	1	1	1	658	659	658	658	659	1	forward	0	1316	2	0.871	0.871	0.298	KU875173	745.32	nr	0	AACTTTATATTTTATTTTTGGGGCTTGAGCTGGAATAGTTGGAACATCTTTAAGAATGTTAATTCGAGCAGAATTAGGTAATCCTGGATCTTTAATTGGAGACGATCAAATTTATAATGTAATTGTAACTGCTCATGCTTTCATTATAATTTTTTTTATAGTTATACCTATTATAATTGGGGGATTTGGAAACTGATTAGTACCTTTAATACTTGGAGCACCTGATATAGCTTTTCCTCGAATAAATAATATAAGATTTTGACTTTTACCCCCATCTTTAACTTTACTCTTAATAAGAAGAATAGTAGAAAGAGGTGCAGGAACTGGATGAACAGTTTATCCCCCTCTTTCATCTAATATTGCTCATGGAGGATCTTCAGTAGACTTAGCTATTTTTAG…	TRUE	0.934	658	1	658	2	658	Fri Aug 04 11:37:09 SGT 2017	DNA	Hapalaraea sp.	1	Metrioidea grandis C8417	0.997	658	1	-1	0	659	linear
Metrioidea grandis C8094	KC255426	Search Hit	Search Hit	ACCTTATATTTCATTTTTGGTATTTGAGCTGGAATAGTAGGAACTTCACTAAGAATACTTATTCGATCAGAATTAGGTAATCCTGGATCTTTAATTGGAAATGATCAAATTTATAATGTTATTGTTACAGCCCATGCTTTTATCATAATTTTTTTTATGGTGATACCAATTATAATTGGTGGATTTGGAAATTGATTAGTCCCTTTAATAATCGGTGCACCAGATATAGCATTCCCTCGAATAAATAATATAAGATTTTGACTTTTACCTCCTTCACTT-TTCTTACTTTTAATAAGAAGAGTAGTAGAAAATGGAGCTGGAACTGGTTGAACTGTTTATCCCCCCCTTTCAGCCAATGTAGCTCATAGAGGATCTTCTGTAGATTTAGCTATTTTCAG…	1	2	19	661	664	679	661	663	1	forward	0	1322	2	0.864	0.864	0.312	KC255426	723.16	nr	0	ACCTTATATTTCATTTTTGGTATTTGAGCTGGAATAGTAGGAACTTCACTAAGAATACTTATTCGATCAGAATTAGGTAATCCTGGATCTTTAATTGGAAATGATCAAATTTATAATGTTATTGTTACAGCCCATGCTTTTATCATAATTTTTTTTATGGTGATACCAATTATAATTGGTGGATTTGGAAATTGATTAGTCCCTTTAATAATCGGTGCACCAGATATAGCATTCCCTCGAATAAATAATATAAGATTTTGACTTTTACCTCCTTCACTTTTCTTACTTTTAATAAGAAGAGTAGTAGAAAATGGAGCTGGAACTGGTTGAACTGTTTATCCCCCCCTTTCAGCCAATGTAGCTCATAGAGGATCTTCTGTAGATTTAGCTATTTTCAGA…	TRUE	0.931	679	19	661	2	661	Fri Aug 04 11:37:09 SGT 2017	DNA	Phaedon armoraciae	1	Metrioidea grandis C8094	0.9985	662	2	-1	0	663	linear
Monolepta sp. 1 C8323	KC185733	Search Hit	Search Hit	TATTTTATTTTTGGTATATGAGCTGGAATAGTAGGAACTTCATTAAGAATTTTAATTCGAGCAGAATTAGGAAGACCAGGATCTTTAATTGGAAATGATCAAATTTATAATGTAATTGTAACAGCCCATGCATTTATTATAATTTTTTTCATAGTAATACCTATTATAATTGGAGGTTTTGGAAACTGATTAGTCCCATTAATAATTGGAGCCCCAGATATAGCTTTTCCTCGAATAAATAATATAAGATTTTGATTATTGCCCCCATCTTTATTTTTATTAATTATAAGAAGAATTGTTGAAAGAGGAGCAGGAACAGGATGAACAGTTTATCCTCCCCT-T-TCTTCCAATATTGCCCATGGAGGAGCTTCAGTTGATTTAGCAATTTTTAGTCTTC…	1	8	25	655	665	679	655	658	1	forward	0	1310	2	0.851	0.851	0.307	KC185733	667.761	nr	0	TATTTTATTTTTGGTATATGAGCTGGAATAGTAGGAACTTCATTAAGAATTTTAATTCGAGCAGAATTAGGAAGACCAGGATCTTTAATTGGAAATGATCAAATTTATAATGTAATTGTAACAGCCCATGCATTTATTATAATTTTTTTCATAGTAATACCTATTATAATTGGAGGTTTTGGAAACTGATTAGTCCCATTAATAATTGGAGCCCCAGATATAGCTTTTCCTCGAATAAATAATATAAGATTTTGATTATTGCCCCCATCTTTATTTTTATTAATTATAAGAAGAATTGTTGAAAGAGGAGCAGGAACAGGATGAACAGTTTATCCTCCCCTTTCTTCCAATATTGCCCATGGAGGAGCTTCAGTTGATTTAGCAATTTTTAGTCTTCAT…	TRUE	0.92	679	25	655	2	655	Fri Aug 04 11:37:12 SGT 2017	DNA	Monolepta atrimarginata	1	Monolepta sp. 1 C8323	0.9894	662	8	-1	0	658	linear
Monolepta sp. 1 C8427	KC185733	Search Hit	Search Hit	TATTTTATTTTTGGTATATGAGCTGGAATAGTAGGAACTTCATTAAGAATTTTAATTCGAGCAGAATTAGGAAGACCAGGATCTTTAATTGGAAATGATCAAATTTATAATGTAATTGTAACAGCCCATGCATTTATTATAATTTTTTTCATAGTAATACCTATTATAATTGGAGGTTTTGGAAACTGATTAGTCCCATTAATAATTGGAGCCCCAGATATAGCTTTTCCTCGAATAAATAATATAAGATTTTGATTATTGCCCCCATCTTTATTTTTATTAATTATAAGAAGAATTGTTGAAAGAGGAGCAGGAACAGGATGAACAGTTTATCCTCCCCTT-TCTTCCAATATTGCCCATGGAGGAGCTTCAGTTGATTTAGCAATTTTTAGTCTTCA…	1	8	25	654	663	678	654	656	1	forward	0	1308	2	0.851	0.851	0.307	KC185733	665.914	nr	0	TATTTTATTTTTGGTATATGAGCTGGAATAGTAGGAACTTCATTAAGAATTTTAATTCGAGCAGAATTAGGAAGACCAGGATCTTTAATTGGAAATGATCAAATTTATAATGTAATTGTAACAGCCCATGCATTTATTATAATTTTTTTCATAGTAATACCTATTATAATTGGAGGTTTTGGAAACTGATTAGTCCCATTAATAATTGGAGCCCCAGATATAGCTTTTCCTCGAATAAATAATATAAGATTTTGATTATTGCCCCCATCTTTATTTTTATTAATTATAAGAAGAATTGTTGAAAGAGGAGCAGGAACAGGATGAACAGTTTATCCTCCCCTTTCTTCCAATATTGCCCATGGAGGAGCTTCAGTTGATTTAGCAATTTTTAGTCTTCAT…	TRUE	0.92	678	25	654	2	654	Fri Aug 04 11:37:12 SGT 2017	DNA	Monolepta atrimarginata	1	Monolepta sp. 1 C8427	0.9894	661	8	-1	0	656	linear
Monolepta sp. 10 C8104	KJ677806	Search Hit	Search Hit	AACTTTATACTTCATTTTTGGAATTTGAGCTGGAATAGTAGGAACTTCCTTAAGAATTTTAATTCGAGCTGAATTAGGAAGTCCGGGATCCTTAATTGGAAATGATCAAATTTATAATGTTATTGTAACTGCCCATGCATTCATTATAATTTTTTTCATAGTAATACCAATTATAATTGGGGGATTTGGAAATTGATTAGTTCCTTTAATAATTGGGGCTCCAGATATGGCTTTTCCACGAATAAATAATATAAGATTTTGATTACTACCACCATCACTATTTCTTTTAATTATAAGAAGAGTAGTTGAAAGAGGTGCCGGTACTGGATGAACAGTTTATCCTCCTCTATCATCAAATATTGCCCATAGAGGAGCTTCTGTTGATTTAGCTATTTTTAG…	1	1	1	658	658	658	658	658	1	forward	0	1316	2	0.891	0.891	0.304	KJ677806	817.339	nr	0	AACTTTATACTTCATTTTTGGAATTTGAGCTGGAATAGTAGGAACTTCCTTAAGAATTTTAATTCGAGCTGAATTAGGAAGTCCGGGATCCTTAATTGGAAATGATCAAATTTATAATGTTATTGTAACTGCCCATGCATTCATTATAATTTTTTTCATAGTAATACCAATTATAATTGGGGGATTTGGAAATTGATTAGTTCCTTTAATAATTGGGGCTCCAGATATGGCTTTTCCACGAATAAATAATATAAGATTTTGATTACTACCACCATCACTATTTCTTTTAATTATAAGAAGAGTAGTTGAAAGAGGTGCCGGTACTGGATGAACAGTTTATCCTCCTCTATCATCAAATATTGCCCATAGAGGAGCTTCTGTTGATTTAGCTATTTTTAG…	TRUE	0.942	658	1	658	2	658	Fri Aug 04 11:37:10 SGT 2017	DNA	Galerucinae sp.	1	Monolepta sp. 10 C8104	0.994	658	1	-1	0	658	linear
Monolepta sp. 10 C8181	KJ677806	Search Hit	Search Hit	AACTTTATACTTCATTTTTGGAATTTGAGCTGGAATAGTAGGAACTTCCTTAAGAATTTTAATTCGAGCTGAATTAGGAAGTCCGGGATCCTTAATTGGAAATGATCAAATTTATAATGTTATTGTAACTGCCCATGCATTCATTATAATTTTTTTCATAGTAATACCAATTATAATTGGGGGATTTGGAAATTGATTAGTTCCTTTAATAATTGGGGCTCCAGATATGGCTTTTCCACGAATAAATAATATAAGATTTTGATTACTACCACCATCACTATTTCTTTTAATTATAAGAAGAGTAGTTGAAAGAGGTGCCGGTACTGGATGAACAGTTTATCCTCCTCTATCATCAAATATTGCCCATAGAGGAGCTTCTGTTGATTTAGCTATTTTTAG…	1	1	1	658	658	658	658	658	1	forward	0	1316	2	0.891	0.891	0.304	KJ677806	817.339	nr	0	AACTTTATACTTCATTTTTGGAATTTGAGCTGGAATAGTAGGAACTTCCTTAAGAATTTTAATTCGAGCTGAATTAGGAAGTCCGGGATCCTTAATTGGAAATGATCAAATTTATAATGTTATTGTAACTGCCCATGCATTCATTATAATTTTTTTCATAGTAATACCAATTATAATTGGGGGATTTGGAAATTGATTAGTTCCTTTAATAATTGGGGCTCCAGATATGGCTTTTCCACGAATAAATAATATAAGATTTTGATTACTACCACCATCACTATTTCTTTTAATTATAAGAAGAGTAGTTGAAAGAGGTGCCGGTACTGGATGAACAGTTTATCCTCCTCTATCATCAAATATTGCCCATAGAGGAGCTTCTGTTGATTTAGCTATTTTTAG…	TRUE	0.942	658	1	658	2	658	Fri Aug 04 11:37:09 SGT 2017	DNA	Galerucinae sp.	1	Monolepta sp. 10 C8181	0.994	658	1	-1	0	658	linear
Monolepta sp. 11 C8119	KC185734	Search Hit	Search Hit	TATATTTCATTTTTGGTGTATGAGCAGGAATAGTTGGAACTTCATTAAGAATTTTAATTCGAGCTGAATTAGGAAGACCTGGATCATTAATTGGAAATGATCAAATTTATAATGTAATTGTTACAGCACATGCATTTATTATAATTTTTTTTATAGTTATACCAATTATAATTGGAGGATTTGGAAATTGATTAGTTCCTCTAATAATTGGAGCCCCTGATATAGCTTTTCCTCGAATAAATAATATAAGATTTTGACTTCTCCCCCCGTCTTTATTTTTATTAATTATAAGAAGAGTTGTTGAAAGAGGAGCAGGAACAGGATGAACAGTTTACCCCCCACTTTCATCCAATATTGCTCATGGAGGAGCATCTGTTGACTTAGCAATTTTTAGACTTC…	1	6	23	657	663	679	657	658	1	forward	0	1314	2	0.895	0.895	0.314	KC185734	832.113	nr	0	TATATTTCATTTTTGGTGTATGAGCAGGAATAGTTGGAACTTCATTAAGAATTTTAATTCGAGCTGAATTAGGAAGACCTGGATCATTAATTGGAAATGATCAAATTTATAATGTAATTGTTACAGCACATGCATTTATTATAATTTTTTTTATAGTTATACCAATTATAATTGGAGGATTTGGAAATTGATTAGTTCCTCTAATAATTGGAGCCCCTGATATAGCTTTTCCTCGAATAAATAATATAAGATTTTGACTTCTCCCCCCGTCTTTATTTTTATTAATTATAAGAAGAGTTGTTGAAAGAGGAGCAGGAACAGGATGAACAGTTTACCCCCCACTTTCATCCAATATTGCTCATGGAGGAGCATCTGTTGACTTAGCAATTTTTAGACTTC…	TRUE	0.944	679	23	657	2	657	Fri Aug 04 11:37:10 SGT 2017	DNA	Monolepta longitarsoides	1	Monolepta sp. 11 C8119	0.9924	662	6	-1	0	658	linear
Monolepta sp. 12 C9201	KM447871	Search Hit	Search Hit	TATATTTTATCTTTGGAATTTGAGCAGGGATAGTTGGTACTTCACTAAGAATTCTTGTTCGAGCTGAATTAGGAAGACCGGGAACTTTAATTGGTAACGATCAAATTTATAATGTAATTGTTACTGCTCATGCTTTTATCATAATTTTTTTTATAGTGATGCCTATCATAATTGGAGGATTTGGAAACTGATTAGTACCCCTAATAATTGGTGCCCCAGATATGGCTTTTCCTCGAATAAATAATATAAGATTTTGGTTATTACCCCCATCATTATTTTTATTAATTATGAGAAGAATCGTAGAAAGAGGAGCTGGAACAGGATGAACAGTTTACCCCCCACTTTCATCTAATATTGCTCATGGCGGTTCTTCAGTAGATTTAGCTATTTTTAGATTAC…	1	6	6	646	651	651	646	646	1	forward	0	1292	2	0.865	0.865	0.324	KM447871	712.08	nr	0	TATATTTTATCTTTGGAATTTGAGCAGGGATAGTTGGTACTTCACTAAGAATTCTTGTTCGAGCTGAATTAGGAAGACCGGGAACTTTAATTGGTAACGATCAAATTTATAATGTAATTGTTACTGCTCATGCTTTTATCATAATTTTTTTTATAGTGATGCCTATCATAATTGGAGGATTTGGAAACTGATTAGTACCCCTAATAATTGGTGCCCCAGATATGGCTTTTCCTCGAATAAATAATATAAGATTTTGGTTATTACCCCCATCATTATTTTTATTAATTATGAGAAGAATCGTAGAAAGAGGAGCTGGAACAGGATGAACAGTTTACCCCCCACTTTCATCTAATATTGCTCATGGCGGTTCTTCAGTAGATTTAGCTATTTTTAGATTAC…	TRUE	0.928	651	6	646	2	646	Fri Aug 04 11:37:10 SGT 2017	DNA	Lochmaea crataegi	1	Monolepta sp. 12 C9201	0.9908	651	6	-1	0	646	linear
Monolepta sp. 14 C9418	KF653804	Search Hit	Search Hit	TTATATTTTATTTTTGGTATTTGATCAGGAATAGTAGGAACTTCATTAAGAATATTAATTCGAACAGAACTCGGTAATCCAGGATCATTAATTGGAAATGATCAAATTTATAATGTAATTGTTACAGCCCATGCCTTTATCATAATTTTTTTTATAGTAATACCAATTATAATTGGGGGATTTGGAAATTGATTAGTCCCTCTAATAATTGGTGCCCCAGATATAGCTTTTCCCCGAATAAATAATATAAGATTTTGATTACTCCCCCCATCATTATTTTTATTATTAATAAGAAGAGTTGTAGAAAGAGGTGCTGGAACTGGATGAACAGTTTACCCCCCTTTATCCTCAAATATTGCCCATGGAGGATCTTCAGTAGATTTAGCAATTTTTAGTTTA…	1	5	2	654	658	655	654	654	1	forward	0	1308	2	0.853	0.853	0.306	KF653804	676.994	nr	0	TTATATTTTATTTTTGGTATTTGATCAGGAATAGTAGGAACTTCATTAAGAATATTAATTCGAACAGAACTCGGTAATCCAGGATCATTAATTGGAAATGATCAAATTTATAATGTAATTGTTACAGCCCATGCCTTTATCATAATTTTTTTTATAGTAATACCAATTATAATTGGGGGATTTGGAAATTGATTAGTCCCTCTAATAATTGGTGCCCCAGATATAGCTTTTCCCCGAATAAATAATATAAGATTTTGATTACTCCCCCCATCATTATTTTTATTATTAATAAGAAGAGTTGTAGAAAGAGGTGCTGGAACTGGATGAACAGTTTACCCCCCTTTATCCTCAAATATTGCCCATGGAGGATCTTCAGTAGATTTAGCAATTTTTAGTTTA…	TRUE	0.921	655	2	654	2	654	Fri Aug 04 11:37:10 SGT 2017	DNA	Mantura chrysanthemi	1	Monolepta sp. 14 C9418	0.9879	658	5	-1	0	654	linear
Monolepta sp. 14 C9556	KF653804	Search Hit	Search Hit	TTATATTTTATTTTTGGTATTTGATCAGGAATAGTAGGAACTTCATTAAGAATATTAATTCGAACAGAACTCGGTAATCCAGGATCATTAATTGGAAATGATCAAATTTATAATGTAATTGTTACAGCCCATGCCTTTATCATAATTTTTTTTATAGTAATACCAATTATAATTGGGGGATTTGGAAATTGATTAGTCCCTCTAATAATTGGTGCCCCAGATATAGCTTTTCCCCGAATAAATAATATAAGATTTTGATTACTCCCCCCATCATTATTTTTATTATTAATAAGAAGAGTTGTAGAAAGAGGTGCTGGAACTGGATGAACAGTTTACCCCCCTTTATCCTCAAATATTGCCCATGGAGGATCTTCAGTAGATTTAGCAATTTTTAGTTTA…	1	5	2	641	645	642	641	641	1	forward	0	1282	2	0.853	0.853	0.307	KF653804	664.068	nr	0	TTATATTTTATTTTTGGTATTTGATCAGGAATAGTAGGAACTTCATTAAGAATATTAATTCGAACAGAACTCGGTAATCCAGGATCATTAATTGGAAATGATCAAATTTATAATGTAATTGTTACAGCCCATGCCTTTATCATAATTTTTTTTATAGTAATACCAATTATAATTGGGGGATTTGGAAATTGATTAGTCCCTCTAATAATTGGTGCCCCAGATATAGCTTTTCCCCGAATAAATAATATAAGATTTTGATTACTCCCCCCATCATTATTTTTATTATTAATAAGAAGAGTTGTAGAAAGAGGTGCTGGAACTGGATGAACAGTTTACCCCCCTTTATCCTCAAATATTGCCCATGGAGGATCTTCAGTAGATTTAGCAATTTTTAGTTTA…	TRUE	0.924	642	2	641	2	641	Fri Aug 04 11:37:10 SGT 2017	DNA	Mantura chrysanthemi	1	Monolepta sp. 14 C9556	0.9938	645	5	-1	0	641	linear
Monolepta sp. 14 C9557	KF654246	Search Hit	Search Hit	TTATATTTTATTTTTGGTATTTGATCAGGAATAGTAGGAACTTCATTAAGAATATTAATTCGAACAGAACTCGGTAATCCAGGGTCATTAATTGGAAATGATCAAATTTATAATGTAATTGTAACAGCCCATGCCTTTATCATAATTTTTTTTATAGTAATACCAATTATAATTGGGGGATTTGGAAATTGATTAGTCCCTCTAATAATTGGTGCCCCAGATATAGCTTTTCCTCGAATAAATAATATAAGATTTTGATTACTCCCCCCATCATTATTTTTATTATTAATAAGAAGAGTTGTAGAAAGAGGTGCTGGAACTGGATGAACAGTTTATCCCCCTTTATCCTCAAATATTGCCCATGGAGGATCTTCAGTAGATTTAGCAATTTTTAGTTTA…	1	5	2	654	658	655	654	654	1	forward	0	1308	2	0.853	0.853	0.304	KF654246	676.994	nr	0	TTATATTTTATTTTTGGTATTTGATCAGGAATAGTAGGAACTTCATTAAGAATATTAATTCGAACAGAACTCGGTAATCCAGGGTCATTAATTGGAAATGATCAAATTTATAATGTAATTGTAACAGCCCATGCCTTTATCATAATTTTTTTTATAGTAATACCAATTATAATTGGGGGATTTGGAAATTGATTAGTCCCTCTAATAATTGGTGCCCCAGATATAGCTTTTCCTCGAATAAATAATATAAGATTTTGATTACTCCCCCCATCATTATTTTTATTATTAATAAGAAGAGTTGTAGAAAGAGGTGCTGGAACTGGATGAACAGTTTATCCCCCTTTATCCTCAAATATTGCCCATGGAGGATCTTCAGTAGATTTAGCAATTTTTAGTTTA…	TRUE	0.921	655	2	654	2	654	Fri Aug 04 11:37:10 SGT 2017	DNA	Mantura chrysanthemi	1	Monolepta sp. 14 C9557	0.9879	658	5	-1	0	654	linear
Monolepta sp. 15 C8456	AB794741	Search Hit	Search Hit	AACCTTATATTTTATTTTTGGAATTTGAGCAGGAATAGTTGGAACATCTTTAAGAATTCTAATTCGAACAGAATTAGGAAGCCCTGGCTCATTAATTGGAAATGATCAAATTTATAATGTAATTGTCACAGCCCATGCATTTATTATAATTTTTTTTATAGTTATACCTATTATAATTGGTGGATTTGGAAATTGACTTGTCCCATTAATAATTGGAGCCCCTGATATAGCTTTTCCTCGAATAAATAATATAAGATTTTGATTATTGCCCCCATCATTATTTTTATTAATTATAAGAAGAATTGTTGAAAGAGGTGCTGGGACAGGATGAACTGTTTATCCTCCTTTATCTTCTAATATTGCCCATGGAGGTGCTTCTGTAGATTTAGCAATTTTTAG…	1	1	1	658	658	658	658	658	1	forward	0	1316	2	0.93	0.93	0.301	AB794741	961.378	nr	0	AACCTTATATTTTATTTTTGGAATTTGAGCAGGAATAGTTGGAACATCTTTAAGAATTCTAATTCGAACAGAATTAGGAAGCCCTGGCTCATTAATTGGAAATGATCAAATTTATAATGTAATTGTCACAGCCCATGCATTTATTATAATTTTTTTTATAGTTATACCTATTATAATTGGTGGATTTGGAAATTGACTTGTCCCATTAATAATTGGAGCCCCTGATATAGCTTTTCCTCGAATAAATAATATAAGATTTTGATTATTGCCCCCATCATTATTTTTATTAATTATAAGAAGAATTGTTGAAAGAGGTGCTGGGACAGGATGAACTGTTTATCCTCCTTTATCTTCTAATATTGCCCATGGAGGTGCTTCTGTAGATTTAGCAATTTTTAG…	TRUE	0.964	658	1	658	2	658	Fri Aug 04 11:37:10 SGT 2017	DNA	Monolepta sp.	1	Monolepta sp. 15 C8456	0.997	658	1	-1	0	658	linear
Monolepta sp. 17 C9449	AB794728	Search Hit	Search Hit	TATATTTTATTTTTGGAATTTGAGCTGGAATAGTAGGAACTTCTTTAAGAATTTTAATTCGAGCTGAATTAGGAAGACCTGGATCTTTAATTGGAAATGATCAAATTTATAATGTTATTGTAACTGCCCATGCATTCATTATAATTTTTTTCATAGTAATACCAATTATAATTGGAGGATTTGGAAATTGATTAGTTCCTCTAATAATTGGTGCTCCTGATATAGCTTTCCCACGAATGAATAACATAAGATTTTGACTACTACCCCCTTCACTATTTTTATTGATTATAAGAAGAATTGTAGAAAGAGGAGCTGGAACAGGATGAACTGTTTATCCTCCGCTATCATCTAATATTGCTCATGGAGGAGCATCAGTAGATTTGGCTATTTTTAGATTAC…	1	6	1	652	657	652	652	652	1	forward	0	1304	2	0.971	0.971	0.314	AB794728	1099.88	nr	0	TATATTTTATTTTTGGAATTTGAGCTGGAATAGTAGGAACTTCTTTAAGAATTTTAATTCGAGCTGAATTAGGAAGACCTGGATCTTTAATTGGAAATGATCAAATTTATAATGTTATTGTAACTGCCCATGCATTCATTATAATTTTTTTCATAGTAATACCAATTATAATTGGAGGATTTGGAAATTGATTAGTTCCTCTAATAATTGGTGCTCCTGATATAGCTTTCCCACGAATGAATAACATAAGATTTTGACTACTACCCCCTTCACTATTTTTATTGATTATAAGAAGAATTGTAGAAAGAGGAGCTGGAACAGGATGAACTGTTTATCCTCCGCTATCATCTAATATTGCTCATGGAGGAGCATCAGTAGATTTGGCTATTTTTAGATTAC…	TRUE	0.978	652	1	652	2	652	Fri Aug 04 11:37:10 SGT 2017	DNA	Monolepta sp.	1	Monolepta sp. 17 C9449	0.9849	657	6	-1	0	652	linear
Monolepta sp. 18 C9679	KC185734	Search Hit	Search Hit	AACTTTATATTTCATTTTTGGTGTATGAGCAGGAATAGTTGGAACTTCATTAAGAATTTTAATTCGAGCTGAATTAGGAAGACCTGGATCATTAATTGGAAATGATCAAATTTATAATGTAATTGTTACAGCACATGCATTTATTATAATTTTTTTTATAGTTATACCAATTATAATTGGAGGATTTGGAAATTGATTAGTTCCTCTAATAATTGGAGCCCCTGATATAGCTTTTCCTCGAATAAATAATATAAGATTTTGACTTCTCCCCCCGTCTTTATTTTTATTAATTATAAGAAGAGTTGTTGAAAGAGGAGCAGGAACAGGATGAACAGTTTACCCCCCACTTTCATCCAATATTGCTCATGGAGGAGCATCTGTTGACTTAGCAATTTTTAG…	1	1	18	662	664	679	662	664	1	forward	0	1324	2	0.898	0.898	0.313	KC185734	846.886	nr	0	AACTTTATATTTCATTTTTGGTGTATGAGCAGGAATAGTTGGAACTTCATTAAGAATTTTAATTCGAGCTGAATTAGGAAGACCTGGATCATTAATTGGAAATGATCAAATTTATAATGTAATTGTTACAGCACATGCATTTATTATAATTTTTTTTATAGTTATACCAATTATAATTGGAGGATTTGGAAATTGATTAGTTCCTCTAATAATTGGAGCCCCTGATATAGCTTTTCCTCGAATAAATAATATAAGATTTTGACTTCTCCCCCCGTCTTTATTTTTATTAATTATAAGAAGAGTTGTTGAAAGAGGAGCAGGAACAGGATGAACAGTTTACCCCCCACTTTCATCCAATATTGCTCATGGAGGAGCATCTGTTGACTTAGCAATTTTTAG…	TRUE	0.949	679	18	662	2	662	Fri Aug 04 11:37:10 SGT 2017	DNA	Monolepta longitarsoides	1	Monolepta sp. 18 C9679	1	662	1	-1	0	664	linear
Monolepta sp. 2 C6931	AB794753	Search Hit	Search Hit	TTATATTTTATTTTTGGAATTTGAGCTGGAATAGTTGGAACTTCATTAAGAATTTTAATTCGAGCTGAATTAGGAAGTCCAGGTTCTTTAATTGGAAATGATCAAATTTATAATGTTATTGTAACTGCCCATGCATTCATTATAATTTTTTTTATAGTAATACCAATTATAATTGGAGGATTTGGAAATTGATTAGTTCCTTTAATAATCGGAGCTCCTGATATAGCTTTCCCTCGAATAAATAATATAAGATTTTGACTTTTACCTCCTTCTTTATTTTTATTAATTATAAGAAGAGTAGTAGAAAGTGGTGCAGGAACAGGTTGAACTGTTTACCCTCCTTTATCATCAAATATTGCCCATGGAGGAGCTTCAGTTGATCTTGCAATTTTTAGTCTT…	1	5	3	654	658	656	654	654	1	forward	0	1308	2	0.904	0.904	0.304	AB794753	859.812	nr	0	TTATATTTTATTTTTGGAATTTGAGCTGGAATAGTTGGAACTTCATTAAGAATTTTAATTCGAGCTGAATTAGGAAGTCCAGGTTCTTTAATTGGAAATGATCAAATTTATAATGTTATTGTAACTGCCCATGCATTCATTATAATTTTTTTTATAGTAATACCAATTATAATTGGAGGATTTGGAAATTGATTAGTTCCTTTAATAATCGGAGCTCCTGATATAGCTTTCCCTCGAATAAATAATATAAGATTTTGACTTTTACCTCCTTCTTTATTTTTATTAATTATAAGAAGAGTAGTAGAAAGTGGTGCAGGAACAGGTTGAACTGTTTACCCTCCTTTATCATCAAATATTGCCCATGGAGGAGCTTCAGTTGATCTTGCAATTTTTAGTCTT…	TRUE	0.946	656	3	654	2	654	Fri Aug 04 11:37:11 SGT 2017	DNA	Monolepta sp.	1	Monolepta sp. 2 C6931	0.9879	658	5	-1	0	654	linear
Monolepta sp. 3 C6924	KC185734	Search Hit	Search Hit	AACTTTATATTTCATTTTTGGTGTATGAGCAGGAATAGTTGGAACTTCATTAAGAATTTTAATTCGAGCTGAATTAGGAAGACCTGGATCATTAATTGGAAATGATCAAATTTATAATGTAATTGTTACAGCACATGCATTTATTATAATTTTTTTTATAGTTATACCAATTATAATTGGAGGATTTGGAAATTGATTAGTTCCTCTAATAATTGGAGCCCCTGATATAGCTTTTCCTCGAATAAATAATATAAGATTTTGACTTCTCCCCCCGTCTTTATTTTTATTAATTATAAGAAGAGTTGTTGAAAGAGGAGCAGGAACAGGATGAACAGTTTACCCCCCACTTTCATCCAATATTGCTCATGGAGGAGCATCTGTTGACTTAGCAATTTTTAG…	1	1	18	662	663	679	662	663	1	forward	0	1324	2	0.914	0.914	0.313	KC185734	907.825	nr	0	AACTTTATATTTCATTTTTGGTGTATGAGCAGGAATAGTTGGAACTTCATTAAGAATTTTAATTCGAGCTGAATTAGGAAGACCTGGATCATTAATTGGAAATGATCAAATTTATAATGTAATTGTTACAGCACATGCATTTATTATAATTTTTTTTATAGTTATACCAATTATAATTGGAGGATTTGGAAATTGATTAGTTCCTCTAATAATTGGAGCCCCTGATATAGCTTTTCCTCGAATAAATAATATAAGATTTTGACTTCTCCCCCCGTCTTTATTTTTATTAATTATAAGAAGAGTTGTTGAAAGAGGAGCAGGAACAGGATGAACAGTTTACCCCCCACTTTCATCCAATATTGCTCATGGAGGAGCATCTGTTGACTTAGCAATTTTTAG…	TRUE	0.957	679	18	662	2	662	Fri Aug 04 11:37:11 SGT 2017	DNA	Monolepta longitarsoides	1	Monolepta sp. 3 C6924	1	662	1	-1	0	663	linear
Monolepta sp. 4 C6921	AB794741	Search Hit	Search Hit	AACCTTATATTTTATTTTTGGAATTTGAGCAGGAATAGTTGGAACATCTTTAAGAATTCTAATTCGAACAGAATTAGGAAGCCCTGGCTCATTAATTGGAAATGATCAAATTTATAATGTAATTGTCACAGCCCATGCATTTATTATAATTTTTTTTATAGTTATACCTATTATAATTGGTGGATTTGGAAATTGACTTGTCCCATTAATAATTGGAGCCCCTGATATAGCTTTTCCTCGAATAAATAATATAAGATTTTGATTATTGCCCCCATCATTATTTTTATTAATTATAAGAAGAATTGTTGAAAGAGGTGCTGGGACAGGATGAACTGTTTATCCTCCTTTATCTTCTAATATTGCCCATGGAGGTGCTTCTGTAGATTTAGCAATTTTTAG…	1	1	1	658	658	658	658	658	1	forward	0	1316	2	0.909	0.909	0.301	AB794741	883.819	nr	0	AACCTTATATTTTATTTTTGGAATTTGAGCAGGAATAGTTGGAACATCTTTAAGAATTCTAATTCGAACAGAATTAGGAAGCCCTGGCTCATTAATTGGAAATGATCAAATTTATAATGTAATTGTCACAGCCCATGCATTTATTATAATTTTTTTTATAGTTATACCTATTATAATTGGTGGATTTGGAAATTGACTTGTCCCATTAATAATTGGAGCCCCTGATATAGCTTTTCCTCGAATAAATAATATAAGATTTTGATTATTGCCCCCATCATTATTTTTATTAATTATAAGAAGAATTGTTGAAAGAGGTGCTGGGACAGGATGAACTGTTTATCCTCCTTTATCTTCTAATATTGCCCATGGAGGTGCTTCTGTAGATTTAGCAATTTTTAG…	TRUE	0.951	658	1	658	2	658	Fri Aug 04 11:37:11 SGT 2017	DNA	Monolepta sp.	1	Monolepta sp. 4 C6921	0.994	658	1	-1	0	658	linear
Monolepta sp. 5 C8180	AB794753	Search Hit	Search Hit	TTATATTTTATTTTTGGAATTTGAGCTGGAATAGTTGGAACTTCATTAAGAATTTTAATTCGAGCTGAATTAGGAAGTCCAGGTTCTTTAATTGGAAATGATCAAATTTATAATGTTATTGTAACTGCCCATGCATTCATTATAATTTTTTTTATAGTAATACCAATTATAATTGGAGGATTTGGAAATTGATTAGTTCCTTTAATAATCGGAGCTCCTGATATAGCTTTCCCTCGAATAAATAATATAAGATTTTGACTTTTACCTCCTTCTTTATTTTTATTAATTATAAGAAGAGTAGTAGAAAGTGGTGCAGGAACAGGTTGAACTGTTTACCCTCCTTTATCATCAAATATTGCCCATGGAGGAGCTTCAGTTGATCTTGCAATTTTTAGTCTT…	1	5	3	608	612	610	608	608	1	forward	0	1215	2	0.9	0.9	0.294	AB794753	784.1	nr	0	TTATATTTTATTTTTGGAATTTGAGCTGGAATAGTTGGAACTTCATTAAGAATTTTAATTCGAGCTGAATTAGGAAGTCCAGGTTCTTTAATTGGAAATGATCAAATTTATAATGTTATTGTAACTGCCCATGCATTCATTATAATTTTTTTTATAGTAATACCAATTATAATTGGAGGATTTGGAAATTGATTAGTTCCTTTAATAATCGGAGCTCCTGATATAGCTTTCCCTCGAATAAATAATATAAGATTTTGACTTTTACCTCCTTCTTTATTTTTATTAATTATAAGAAGAGTAGTAGAAAGTGGTGCAGGAACAGGTTGAACTGTTTACCCTCCTTTATCATCAAATATTGCCCATGGAGGAGCTTCAGTTGATCTTGCAATTTTTAGTCTT…	TRUE	0.947	610	3	608	2	607	Fri Aug 04 11:37:11 SGT 2017	DNA	Monolepta sp.	1	Monolepta sp. 5 C8180	0.9935	611	5	-1	0	608	linear
Monolepta sp. 5 C8348	AB794757	Search Hit	Search Hit	ATATTTTATTTTTGGTGTATGAGCTGGAATAGTAGGAACTTCATTAAGAATTTTAATTCGAGTTGAACTAGGAAATCCAGGTTCTTTAATTGGAAACGATCAAATTTATAATGTTATTGTAACTGCCCATGCATTCATTATAATTTTTTTCATAGTAATACCAATTATAATTGGTGGATTTGGAAATTGATTAGTTCCTTTAATAATTGGAGCCCCTGATATAGCTTTTCCTCGAATAAATAATATAAGATTTTGATTGTTGCCCCCATCATTATTTTTATTAATTATAAGAAGAATTGTAGAAAGAGGTGCAGGAACTGGTTGAACAGTATACCCTCCTCTTTCATCTAATATTGCCCATGGAGGAGCCTCAGTAGATTTAGCAATTTTTAGGCTTCA…	1	7	1	652	658	652	652	652	1	forward	0	1304	2	0.897	0.897	0.308	AB794757	833.959	nr	0	ATATTTTATTTTTGGTGTATGAGCTGGAATAGTAGGAACTTCATTAAGAATTTTAATTCGAGTTGAACTAGGAAATCCAGGTTCTTTAATTGGAAACGATCAAATTTATAATGTTATTGTAACTGCCCATGCATTCATTATAATTTTTTTCATAGTAATACCAATTATAATTGGTGGATTTGGAAATTGATTAGTTCCTTTAATAATTGGAGCCCCTGATATAGCTTTTCCTCGAATAAATAATATAAGATTTTGATTGTTGCCCCCATCATTATTTTTATTAATTATAAGAAGAATTGTAGAAAGAGGTGCAGGAACTGGTTGAACAGTATACCCTCCTCTTTCATCTAATATTGCCCATGGAGGAGCCTCAGTAGATTTAGCAATTTTTAGGCTTCA…	TRUE	0.942	652	1	652	2	652	Fri Aug 04 11:37:09 SGT 2017	DNA	Monolepta sp.	1	Monolepta sp. 5 C8348	0.9864	658	7	-1	0	652	linear
Monolepta sp. 5 C8403	AB794757	Search Hit	Search Hit	ATATTTTATTTTTGGTGTATGAGCTGGAATAGTAGGAACTTCATTAAGAATTTTAATTCGAGTTGAACTAGGAAATCCAGGTTCTTTAATTGGAAACGATCAAATTTATAATGTTATTGTAACTGCCCATGCATTCATTATAATTTTTTTCATAGTAATACCAATTATAATTGGTGGATTTGGAAATTGATTAGTTCCTTTAATAATTGGAGCCCCTGATATAGCTTTTCCTCGAATAAATAATATAAGATTTTGATTGTTGCCCCCATCATTATTTTTATTAATTATAAGAAGAATTGTAGAAAGAGGTGCAGGAACTGGTTGAACAGTATACCCTCCTCTTTCATCTAATATTGCCCATGGAGGAGCCTCAGTAGATTTAGCAATTTTTAGGCTTCA…	1	7	1	652	658	652	652	652	1	forward	0	1304	2	0.899	0.899	0.308	AB794757	839.499	nr	0	ATATTTTATTTTTGGTGTATGAGCTGGAATAGTAGGAACTTCATTAAGAATTTTAATTCGAGTTGAACTAGGAAATCCAGGTTCTTTAATTGGAAACGATCAAATTTATAATGTTATTGTAACTGCCCATGCATTCATTATAATTTTTTTCATAGTAATACCAATTATAATTGGTGGATTTGGAAATTGATTAGTTCCTTTAATAATTGGAGCCCCTGATATAGCTTTTCCTCGAATAAATAATATAAGATTTTGATTGTTGCCCCCATCATTATTTTTATTAATTATAAGAAGAATTGTAGAAAGAGGTGCAGGAACTGGTTGAACAGTATACCCTCCTCTTTCATCTAATATTGCCCATGGAGGAGCCTCAGTAGATTTAGCAATTTTTAGGCTTCA…	TRUE	0.942	652	1	652	2	652	Fri Aug 04 11:37:09 SGT 2017	DNA	Monolepta sp.	1	Monolepta sp. 5 C8403	0.9849	658	7	-1	0	652	linear
Monolepta sp. 5 C9718	AB794757	Search Hit	Search Hit	ATATTTTATTTTTGGTGTATGAGCTGGAATAGTAGGAACTTCATTAAGAATTTTAATTCGAGTTGAACTAGGAAATCCAGGTTCTTTAATTGGAAACGATCAAATTTATAATGTTATTGTAACTGCCCATGCATTCATTATAATTTTTTTCATAGTAATACCAATTATAATTGGTGGATTTGGAAATTGATTAGTTCCTTTAATAATTGGAGCCCCTGATATAGCTTTTCCTCGAATAAATAATATAAGATTTTGATTGTTGCCCCCATCATTATTTTTATTAATTATAAGAAGAATTGTAGAAAGAGGTGCAGGAACTGGTTGAACAGTATACCCTCCTCTTTCATCTAATATTGCCCATGGAGGAGCCTCAGTAGATTTAGCAATTTTTAGGCTTCA…	1	7	1	650	656	650	650	650	1	forward	0	1300	2	0.898	0.898	0.309	AB794757	835.806	nr	0	ATATTTTATTTTTGGTGTATGAGCTGGAATAGTAGGAACTTCATTAAGAATTTTAATTCGAGTTGAACTAGGAAATCCAGGTTCTTTAATTGGAAACGATCAAATTTATAATGTTATTGTAACTGCCCATGCATTCATTATAATTTTTTTCATAGTAATACCAATTATAATTGGTGGATTTGGAAATTGATTAGTTCCTTTAATAATTGGAGCCCCTGATATAGCTTTTCCTCGAATAAATAATATAAGATTTTGATTGTTGCCCCCATCATTATTTTTATTAATTATAAGAAGAATTGTAGAAAGAGGTGCAGGAACTGGTTGAACAGTATACCCTCCTCTTTCATCTAATATTGCCCATGGAGGAGCCTCAGTAGATTTAGCAATTTTTAGGCTTCA…	TRUE	0.945	650	1	650	2	650	Fri Aug 04 11:37:11 SGT 2017	DNA	Monolepta sp.	1	Monolepta sp. 5 C9718	0.9909	656	7	-1	0	650	linear
Monolepta sp. 5 C9719	AB794753	Search Hit	Search Hit	TTATATTTTATTTTTGGAATTTGAGCTGGAATAGTTGGAACTTCATTAAGAATTTTAATTCGAGCTGAATTAGGAAGTCCAGGTTCTTTAATTGGAAATGATCAAATTTATAATGTTATTGTAACTGCCCATGCATTCATTATAATTTTTTTTATAGTAATACCAATTATAATTGGAGGATTTGGAAATTGATTAGTTCCTTTAATAATCGGAGCTCCTGATATAGCTTTCCCTCGAATAAATAATATAAGATTTTGACTTTTACCTCCTTCTTTATTTTTATTAATTATAAGAAGAGTAGTAGAAAGTGGTGCAGGAACAGGTTGAACTGTTTACCCTCCTTTATCATCAAATATTGCCCATGGAGGAGCTTCAGTTGATCTTGCAATTTTTAGTCTT…	1	5	3	653	657	655	653	653	1	forward	0	1306	2	0.897	0.897	0.305	AB794753	835.806	nr	0	TTATATTTTATTTTTGGAATTTGAGCTGGAATAGTTGGAACTTCATTAAGAATTTTAATTCGAGCTGAATTAGGAAGTCCAGGTTCTTTAATTGGAAATGATCAAATTTATAATGTTATTGTAACTGCCCATGCATTCATTATAATTTTTTTTATAGTAATACCAATTATAATTGGAGGATTTGGAAATTGATTAGTTCCTTTAATAATCGGAGCTCCTGATATAGCTTTCCCTCGAATAAATAATATAAGATTTTGACTTTTACCTCCTTCTTTATTTTTATTAATTATAAGAAGAGTAGTAGAAAGTGGTGCAGGAACAGGTTGAACTGTTTACCCTCCTTTATCATCAAATATTGCCCATGGAGGAGCTTCAGTTGATCTTGCAATTTTTAGTCTT…	TRUE	0.946	655	3	653	2	653	Fri Aug 04 11:37:11 SGT 2017	DNA	Monolepta sp.	1	Monolepta sp. 5 C9719	0.9939	657	5	-1	0	653	linear
Monolepta sp. 5 C9734	AB794757	Search Hit	Search Hit	ATATTTTATTTTTGGTGTATGAGCTGGAATAGTAGGAACTTCATTAAGAATTTTAATTCGAGTTGAACTAGGAAATCCAGGTTCTTTAATTGGAAACGATCAAATTTATAATGTTATTGTAACTGCCCATGCATTCATTATAATTTTTTTCATAGTAATACCAATTATAATTGGTGGATTTGGAAATTGATTAGTTCCTTTAATAATTGGAGCCCCTGATATAGCTTTTCCTCGAATAAATAATATAAGATTTTGATTGTTGCCCCCATCATTATTTTTATTAATTATAAGAAGAATTGTAGAAAGAGGTGCAGGAACTGGTTGAACAGTATACCCTCCTCTTTCATCTAATATTGCCCATGGAGGAGCCTCAGTAGATTTAGCAATTTTTAGGCTTCA…	1	7	1	652	658	652	652	652	1	forward	0	1304	2	0.902	0.902	0.308	AB794757	850.579	nr	0	ATATTTTATTTTTGGTGTATGAGCTGGAATAGTAGGAACTTCATTAAGAATTTTAATTCGAGTTGAACTAGGAAATCCAGGTTCTTTAATTGGAAACGATCAAATTTATAATGTTATTGTAACTGCCCATGCATTCATTATAATTTTTTTCATAGTAATACCAATTATAATTGGTGGATTTGGAAATTGATTAGTTCCTTTAATAATTGGAGCCCCTGATATAGCTTTTCCTCGAATAAATAATATAAGATTTTGATTGTTGCCCCCATCATTATTTTTATTAATTATAAGAAGAATTGTAGAAAGAGGTGCAGGAACTGGTTGAACAGTATACCCTCCTCTTTCATCTAATATTGCCCATGGAGGAGCCTCAGTAGATTTAGCAATTTTTAGGCTTCA…	TRUE	0.943	652	1	652	2	652	Fri Aug 04 11:37:10 SGT 2017	DNA	Monolepta sp.	1	Monolepta sp. 5 C9734	0.9849	658	7	-1	0	652	linear
Monolepta sp. 5 C9897	AB794753	Search Hit	Search Hit	TTATATTTTATTTTTGGAATTTGAGCTGGAATAGTTGGAACTTCATTAAGAATTTTAATTCGAGCTGAATTAGGAAGTCCAGGTTCTTTAATTGGAAATGATCAAATTTATAATGTTATTGTAACTGCCCATGCATTCATTATAATTTTTTTTATAGTAATACCAATTATAATTGGAGGATTTGGAAATTGATTAGTTCCTTTAATAATCGGAGCTCCTGATATAGCTTTCCCTCGAATAAATAATATAAGATTTTGACTTTTACCTCCTTCTTTATTTTTATTAATTATAAGAAGAGTAGTAGAAAGTGGTGCAGGAACAGGTTGAACTGTTTACCCTCCTTTATCATCAAATATTGCCCATGGAGGAGCTTCAGTTGATCTTGCAATTTTTAGTCTT…	1	5	3	654	658	656	654	654	1	forward	0	1308	2	0.896	0.896	0.304	AB794753	832.113	nr	0	TTATATTTTATTTTTGGAATTTGAGCTGGAATAGTTGGAACTTCATTAAGAATTTTAATTCGAGCTGAATTAGGAAGTCCAGGTTCTTTAATTGGAAATGATCAAATTTATAATGTTATTGTAACTGCCCATGCATTCATTATAATTTTTTTTATAGTAATACCAATTATAATTGGAGGATTTGGAAATTGATTAGTTCCTTTAATAATCGGAGCTCCTGATATAGCTTTCCCTCGAATAAATAATATAAGATTTTGACTTTTACCTCCTTCTTTATTTTTATTAATTATAAGAAGAGTAGTAGAAAGTGGTGCAGGAACAGGTTGAACTGTTTACCCTCCTTTATCATCAAATATTGCCCATGGAGGAGCTTCAGTTGATCTTGCAATTTTTAGTCTT…	TRUE	0.942	656	3	654	2	654	Fri Aug 04 11:37:10 SGT 2017	DNA	Monolepta sp.	1	Monolepta sp. 5 C9897	0.9879	658	5	-1	0	654	linear
Monolepta sp. 5 C8178	AB794757	Search Hit	Search Hit	ATATTTTATTTTTGGTGTATGAGCTGGAATAGTAGGAACTTCATTAAGAATTTTAATTCGAGTTGAACTAGGAAATCCAGGTTCTTTAATTGGAAACGATCAAATTTATAATGTTATTGTAACTGCCCATGCATTCATTATAATTTTTTTCATAGTAATACCAATTATAATTGGTGGATTTGGAAATTGATTAGTTCCTTTAATAATTGGAGCCCCTGATATAGCTTTTCCTCGAATAAATAATATAAGATTTTGATTGTTGCCCCCATCATTATTTTTATTAATTATAAGAAGAATTGTAGAAAGAGGTGCAGGAACTGGTTGAACAGTATACCCTCCTCTTTCATCTAATATTGCCCATGGAGGAGCCTCAGTAGATTTAGCAATTTTTAGGCTTCA…	1	7	1	652	658	652	652	652	1	forward	0	1304	2	0.9	0.9	0.308	AB794757	845.039	nr	0	ATATTTTATTTTTGGTGTATGAGCTGGAATAGTAGGAACTTCATTAAGAATTTTAATTCGAGTTGAACTAGGAAATCCAGGTTCTTTAATTGGAAACGATCAAATTTATAATGTTATTGTAACTGCCCATGCATTCATTATAATTTTTTTCATAGTAATACCAATTATAATTGGTGGATTTGGAAATTGATTAGTTCCTTTAATAATTGGAGCCCCTGATATAGCTTTTCCTCGAATAAATAATATAAGATTTTGATTGTTGCCCCCATCATTATTTTTATTAATTATAAGAAGAATTGTAGAAAGAGGTGCAGGAACTGGTTGAACAGTATACCCTCCTCTTTCATCTAATATTGCCCATGGAGGAGCCTCAGTAGATTTAGCAATTTTTAGGCTTCA…	TRUE	0.943	652	1	652	2	652	Fri Aug 04 11:37:09 SGT 2017	DNA	Monolepta sp.	1	Monolepta sp. 5 C8178	0.9849	658	7	-1	0	652	linear
Monolepta sp. 6 C8531	KF966604	Search Hit	Search Hit	ACTTTATATTTTATTTTTGGAATTTGAGCTGGAATGGTTGGAACTTCTCTAAGAATTTTAATTCGAACAGAATTAGGAAGACCAGGTTCATTAATTGGAAATGATCAAATTTATAATGTCATTGTTACAGCTCATGCATTTATTATAATTTTCTTTATAGTAATACCAATTATAATTGGTGGATTCGGAAATTGGTTAGTTCCATTAATAATTGGAGCTCCTGATATAGCTTTTCCTCGAATAAATAATATAAGATTTTGATTGTTGCCCCCATCATTATTTTTATTAATTATAAGAAGAATTGTTGAAAGAGGAGCAGGAACAGGATGAACTGTTTATCCTCCATTATCATCTAATATTGCTCATGGAGGAGCTTCTGTAGATTTAGCAATTTTTAGA…	1	2	1	657	658	657	657	657	1	forward	0	1314	2	0.874	0.874	0.289	KF966604	754.553	nr	0	ACTTTATATTTTATTTTTGGAATTTGAGCTGGAATGGTTGGAACTTCTCTAAGAATTTTAATTCGAACAGAATTAGGAAGACCAGGTTCATTAATTGGAAATGATCAAATTTATAATGTCATTGTTACAGCTCATGCATTTATTATAATTTTCTTTATAGTAATACCAATTATAATTGGTGGATTCGGAAATTGGTTAGTTCCATTAATAATTGGAGCTCCTGATATAGCTTTTCCTCGAATAAATAATATAAGATTTTGATTGTTGCCCCCATCATTATTTTTATTAATTATAAGAAGAATTGTTGAAAGAGGAGCAGGAACAGGATGAACTGTTTATCCTCCATTATCATCTAATATTGCTCATGGAGGAGCTTCTGTAGATTTAGCAATTTTTAGA…	TRUE	0.935	657	1	657	2	657	Fri Aug 04 11:37:11 SGT 2017	DNA	Monolepta quadriguttata	1	Monolepta sp. 6 C8531	0.9955	658	2	-1	0	657	linear
Monolepta sp. 7 C8426	KF946433	Search Hit	Search Hit	TTTATTTTTGGTGTATGAGCTGGAATAGTAGGAACTTCATTAAGAATTTTAATTCGAGCTGAATTAGGAAGACCTGGATCTTTAATTGGAAATGATCAAATTTATAATGTTATTGTAACTGCCCATGCATTCATTATAATTTTTTTCATGGTTATACCAATCATAATTGGTGGTTTTGGCAATTGATTAGTTCCACTAATAATTGGCGCTCCTGATATAGCATTTCCTCGAATAAACAATATAAGATTTTGATTATTACCCCCATCATTATTTTTATTGATTATAAGAAGAATTGTCGAAAGTGGAGCAGGTACAGGATGAACTGTTTATCCTCCTCTTTCCTCAAATATTGCTCATGGTGGAGCTTCTGTTGATTTAGCAATTTTCAGTCTTCATTTA…	1	11	1	648	658	648	648	648	1	forward	0	1296	2	0.98	0.98	0.318	KF946433	1125.73	nr	0	TTTATTTTTGGTGTATGAGCTGGAATAGTAGGAACTTCATTAAGAATTTTAATTCGAGCTGAATTAGGAAGACCTGGATCTTTAATTGGAAATGATCAAATTTATAATGTTATTGTAACTGCCCATGCATTCATTATAATTTTTTTCATGGTTATACCAATCATAATTGGTGGTTTTGGCAATTGATTAGTTCCACTAATAATTGGCGCTCCTGATATAGCATTTCCTCGAATAAACAATATAAGATTTTGATTATTACCCCCATCATTATTTTTATTGATTATAAGAAGAATTGTCGAAAGTGGAGCAGGTACAGGATGAACTGTTTATCCTCCTCTTTCCTCAAATATTGCTCATGGTGGAGCTTCTGTTGATTTAGCAATTTTCAGTCTTCATTTA…	TRUE	0.982	648	1	648	2	648	Fri Aug 04 11:37:11 SGT 2017	DNA	Galerucinae sp.	1	Monolepta sp. 7 C8426	0.9848	658	11	-1	0	648	linear
Monolepta sp. 8 C8314	AB794731	Search Hit	Search Hit	ACCTTATATTTTATTTTTGGTGTTTGAGCCGGTATAGTAGGAACTTCCTTAAGAATTTTAATTCGAGCAGAATTAGGAAGACCTGGTTCTTTAATCGGAAACGATCAAATTTATAATGTTATTGTTACAGCTCATGCGTTTATTATAATTTTTTTCATAGTAATACCAATTATAATTGGAGGTTTTGGAAATTGATTAGTCCCTCTAATAATTGGTGCCCCTGATATAGCTTTTCCCCGAATAAATAATATAAGATTTTGACTTCTTCCCCCTTCCTTATTTTTATTAATTATAAGAAGAGTAGTCGAAAGAGGAGCAGGAACAGGATGAACGGTTTATCCCCCCCTTTCATCTAATATTGCCCATGGAGGAGCTTCAGTTGATTTAGCAATTTTTAGT…	1	2	1	655	656	655	655	655	1	forward	0	1310	2	0.962	0.962	0.334	AB794731	1072.18	nr	0	ACCTTATATTTTATTTTTGGTGTTTGAGCCGGTATAGTAGGAACTTCCTTAAGAATTTTAATTCGAGCAGAATTAGGAAGACCTGGTTCTTTAATCGGAAACGATCAAATTTATAATGTTATTGTTACAGCTCATGCGTTTATTATAATTTTTTTCATAGTAATACCAATTATAATTGGAGGTTTTGGAAATTGATTAGTCCCTCTAATAATTGGTGCCCCTGATATAGCTTTTCCCCGAATAAATAATATAAGATTTTGACTTCTTCCCCCTTCCTTATTTTTATTAATTATAAGAAGAGTAGTCGAAAGAGGAGCAGGAACAGGATGAACGGTTTATCCCCCCCTTTCATCTAATATTGCCCATGGAGGAGCTTCAGTTGATTTAGCAATTTTTAGT…	TRUE	0.976	655	1	655	2	655	Fri Aug 04 11:37:09 SGT 2017	DNA	Monolepta sp.	1	Monolepta sp. 8 C8314	0.9894	656	2	-1	0	655	linear
Monolepta sp. 9 C8525	KJ677802	Search Hit	Search Hit	ACTTTATATTTTATTTTTGGTGTTTGAGCCGGTATAGTTGGAACTTCTTTAAGAATTCTTATTCGAGCTGAATTAGGTAGCCCAGGATCACTAATTGGAAACGATCAAATTTATAATGTTATTGTAACTGCCCATGCATTCATTATAATTTTTTTCATAGTAATGCCAATTATAATTGGTGGTTTTGGAAATTGATTAGTTCCTTTAATAATTGGTGCCCCAGATATAGCTTTTCCTCGAATAAACAATATAAGATTTTGACTATTACCTCCTTCCTTATTTCTTCTAATTATAAGAAGAGTTGTAGAAAGAGGTGCTGGTACTGGATGAACAGTTTATCCTCCTTTATCATCCAATATTGCTCATGGAGGAGCATCTGTTGATTTAGCTATTTTTAGA…	1	2	2	657	658	658	657	657	1	forward	0	1313	2	0.889	0.889	0.318	KJ677802	808.106	nr	0	ACTTTATATTTTATTTTTGGTGTTTGAGCCGGTATAGTTGGAACTTCTTTAAGAATTCTTATTCGAGCTGAATTAGGTAGCCCAGGATCACTAATTGGAAACGATCAAATTTATAATGTTATTGTAACTGCCCATGCATTCATTATAATTTTTTTCATAGTAATGCCAATTATAATTGGTGGTTTTGGAAATTGATTAGTTCCTTTAATAATTGGTGCCCCAGATATAGCTTTTCCTCGAATAAACAATATAAGATTTTGACTATTACCTCCTTCCTTATTTCTTCTAATTATAAGAAGAGTTGTAGAAAGAGGTGCTGGTACTGGATGAACAGTTTATCCTCCTTTATCATCCAATATTGCTCATGGAGGAGCATCTGTTGATTTAGCTATTTTTAGA…	TRUE	0.941	658	2	657	2	656	Fri Aug 04 11:37:11 SGT 2017	DNA	Galerucinae sp.	1	Monolepta sp. 9 C8525	0.9939	657	2	-1	0	657	linear
Monolepta sp. 9 C9440	KC185734	Search Hit	Search Hit	AACTTTATATTTCATTTTTGGTGTATGAGCAGGAATAGTTGGAACTTCATTAAGAATTTTAATTCGAGCTGAATTAGGAAGACCTGGATCATTAATTGGAAATGATCAAATTTATAATGTAATTGTTACAGCACATGCATTTATTATAATTTTTTTTATAGTTATACCAATTATAATTGGAGGATTTGGAAATTGATTAGTTCCTCTAATAATTGGAGCCCCTGATATAGCTTTTCCTCGAATAAATAATATAAGATTTTGACTTCTCCCCCCGTCTTTATTTTTATTAATTATAAGAAGAGTTGTTGAAAGAGGAGCAGGAACAGGATGAACAGTTTACCCCCCACTTTCATCCAATATTGCTCATGGAGGAGCATCTGTTGACTTAGCAATTTTTAG…	1	1	18	662	663	679	662	663	1	forward	0	1324	2	0.89	0.89	0.313	KC185734	819.186	nr	0	AACTTTATATTTCATTTTTGGTGTATGAGCAGGAATAGTTGGAACTTCATTAAGAATTTTAATTCGAGCTGAATTAGGAAGACCTGGATCATTAATTGGAAATGATCAAATTTATAATGTAATTGTTACAGCACATGCATTTATTATAATTTTTTTTATAGTTATACCAATTATAATTGGAGGATTTGGAAATTGATTAGTTCCTCTAATAATTGGAGCCCCTGATATAGCTTTTCCTCGAATAAATAATATAAGATTTTGACTTCTCCCCCCGTCTTTATTTTTATTAATTATAAGAAGAGTTGTTGAAAGAGGAGCAGGAACAGGATGAACAGTTTACCCCCCACTTTCATCCAATATTGCTCATGGAGGAGCATCTGTTGACTTAGCAATTTTTAG…	TRUE	0.945	679	18	662	2	662	Fri Aug 04 11:37:09 SGT 2017	DNA	Monolepta longitarsoides	1	Monolepta sp. 9 C9440	1	662	1	-1	0	663	linear
Monolepta sp. 9 C9825	KC185734	Search Hit	Search Hit	AACTTTATATTTCATTTTTGGTGTATGAGCAGGAATAGTTGGAACTTCATTAAGAATTTTAATTCGAGCTGAATTAGGAAGACCTGGATCATTAATTGGAAATGATCAAATTTATAATGTAATTGTTACAGCACATGCATTTATTATAATTTTTTTTATAGTTATACCAATTATAATTGGAGGATTTGGAAATTGATTAGTTCCTCTAATAATTGGAGCCCCTGATATAGCTTTTCCTCGAATAAATAATATAAGATTTTGACTTCTCCCCCCGTCTTTATTTTTATTAATTATAAGAAGAGTTGTTGAAAGAGGAGCAGGAACAGGATGAACAGTTTACCCCCCACTTTCATCCAATATTGCTCATGGAGGAGCATCTGTTGACTTAGCAATTTTTAG…	1	1	18	662	663	679	662	663	1	forward	0	1324	2	0.89	0.89	0.313	KC185734	819.186	nr	0	AACTTTATATTTCATTTTTGGTGTATGAGCAGGAATAGTTGGAACTTCATTAAGAATTTTAATTCGAGCTGAATTAGGAAGACCTGGATCATTAATTGGAAATGATCAAATTTATAATGTAATTGTTACAGCACATGCATTTATTATAATTTTTTTTATAGTTATACCAATTATAATTGGAGGATTTGGAAATTGATTAGTTCCTCTAATAATTGGAGCCCCTGATATAGCTTTTCCTCGAATAAATAATATAAGATTTTGACTTCTCCCCCCGTCTTTATTTTTATTAATTATAAGAAGAGTTGTTGAAAGAGGAGCAGGAACAGGATGAACAGTTTACCCCCCACTTTCATCCAATATTGCTCATGGAGGAGCATCTGTTGACTTAGCAATTTTTAG…	TRUE	0.945	679	18	662	2	662	Fri Aug 04 11:37:09 SGT 2017	DNA	Monolepta longitarsoides	1	Monolepta sp. 9 C9825	1	662	1	-1	0	663	linear
Nodina sp. C8179	KU873303	Search Hit	Search Hit	ACTCTATATTTTATTTTTGGTGCTTGAGCAGGAATAGTAGGAACATCATTAAGATTATTAATTCGAGCAGAATTAGGAAACCCAGGCTCTTTAATTGGAGATGATCAAATTTATAATGTAATTGTAACAGCCCATGCATTCATTATAATTTTTTTCATAGTAATACCAATTATAATTGGAGGATTTGGAAATTGACTAGTTCCTTTAATATTAGGAGCTCCTGATATAGCTTTCCCTCGAATAAATAATATAAGATTTTGATTACTACCTCCTTCATTAACTTTATTATTGATAAGAAGAATTGTAGAAAATGGTGCAGGAACAGGATGAACAGTATACCCCCCACTTTCATCTAATATTGCCCATAGAGGTTCTTCAGTTGATTTAGCTATTTTTAGA…	1	2	2	657	658	658	657	657	1	forward	0	1314	2	0.84	0.84	0.309	KU873303	632.674	nr	3.3e-177	ACTCTATATTTTATTTTTGGTGCTTGAGCAGGAATAGTAGGAACATCATTAAGATTATTAATTCGAGCAGAATTAGGAAACCCAGGCTCTTTAATTGGAGATGATCAAATTTATAATGTAATTGTAACAGCCCATGCATTCATTATAATTTTTTTCATAGTAATACCAATTATAATTGGAGGATTTGGAAATTGACTAGTTCCTTTAATATTAGGAGCTCCTGATATAGCTTTCCCTCGAATAAATAATATAAGATTTTGATTACTACCTCCTTCATTAACTTTATTATTGATAAGAAGAATTGTAGAAAATGGTGCAGGAACAGGATGAACAGTATACCCCCCACTTTCATCTAATATTGCCCATAGAGGTTCTTCAGTTGATTTAGCTATTTTTAGA…	TRUE	0.919	658	2	657	2	657	Fri Aug 04 11:37:05 SGT 2017	DNA	Colydiinae sp.	1	Nodina sp. C8179	0.9985	658	2	-1	0	657	linear
Nodina sp. C8197	KF946194	Search Hit	Search Hit	TTTATTTTTGGAGCCTGAGCAGGAATAGTTGGTACCTCCCTAAGACTACTAATCCGAATTGAATTAGGTAATCCAGGAAC-CTTAATTGGAAACGATCAAATTTATAATACCATTGTAACTGCTCATGCCTTTATTATAATTTTTTTTATAGTAATACCAATCATAATTGGGGGATTCGGAAATTGATTAGTCCCCCTAATACTAGGAGCACCAGATATAGCATTTCCTCGAATAAATAATATAAGATTTTGATTACTCCCCCCATCATTAACTTTATTAATTATAAGAAGAATTGTTGAAAACGGTGTAGGAACTGGATGAACTGTTTATCCCCCCCTTTCTGCTAATATTGCCCATAGAGGTTCAAGAGTAGATTTAGCTATTTTCAGCCTACATTT…	1	11	1	648	659	648	648	649	1	forward	0	1296	2	0.844	0.844	0.338	KF946194	638.214	nr	7.09e-179	TTTATTTTTGGAGCCTGAGCAGGAATAGTTGGTACCTCCCTAAGACTACTAATCCGAATTGAATTAGGTAATCCAGGAACCTTAATTGGAAACGATCAAATTTATAATACCATTGTAACTGCTCATGCCTTTATTATAATTTTTTTTATAGTAATACCAATCATAATTGGGGGATTCGGAAATTGATTAGTCCCCCTAATACTAGGAGCACCAGATATAGCATTTCCTCGAATAAATAATATAAGATTTTGATTACTCCCCCCATCATTAACTTTATTAATTATAAGAAGAATTGTTGAAAACGGTGTAGGAACTGGATGAACTGTTTATCCCCCCCTTTCTGCTAATATTGCCCATAGAGGTTCAAGAGTAGATTTAGCTATTTTCAGCCTACATTTA…	TRUE	0.912	648	1	648	2	648	Fri Aug 04 11:37:05 SGT 2017	DNA	Eumolpinae sp.	1	Nodina sp. C8197	0.9789	658	11	-1	0	649	linear
Nodina sp. C8398	KF946194	Search Hit	Search Hit	TTTATTTTTGGAGCCTGAGCAGGAATAGTTGGTACCTCCCTAAGACTACTAATCCGAATTGAATTAGGTAATCCAGGAACCTTAATTGGAAACGATCAAATTTATAATACCATTGTAACTGCTCATGCCTTTATTATAATTTTTTTTATAGTAATACCAATCATAATTGGGGGATTCGGAAATTGATTAGTCCCCCTAATACTAGGAGCACCAGATATAGCATTTCCTCGAATAAATAATATAAGATTTTGATTACTCCCCCCATCATTAACTTTATTAATTATAAGAAGAATTGTTGAAAACGGTGTAGGAACTGGATGAACTGTTTATCCCCCCCTTTCTGCTAATATTGCCCATAGAGGTTCAAGAGTAGATTTAGCTATTTTCAGCCTACATTTA…	1	11	1	648	659	648	648	649	1	forward	0	1296	2	0.844	0.844	0.338	KF946194	638.214	nr	7.09e-179	TTTATTTTTGGAGCCTGAGCAGGAATAGTTGGTACCTCCCTAAGACTACTAATCCGAATTGAATTAGGTAATCCAGGAACCTTAATTGGAAACGATCAAATTTATAATACCATTGTAACTGCTCATGCCTTTATTATAATTTTTTTTATAGTAATACCAATCATAATTGGGGGATTCGGAAATTGATTAGTCCCCCTAATACTAGGAGCACCAGATATAGCATTTCCTCGAATAAATAATATAAGATTTTGATTACTCCCCCCATCATTAACTTTATTAATTATAAGAAGAATTGTTGAAAACGGTGTAGGAACTGGATGAACTGTTTATCCCCCCCTTTCTGCTAATATTGCCCATAGAGGTTCAAGAGTAGATTTAGCTATTTTCAGCCTACATTTA…	TRUE	0.912	648	1	648	2	648	Fri Aug 04 11:37:06 SGT 2017	DNA	Eumolpinae sp.	1	Nodina sp. C8398	0.9789	658	11	-1	0	649	linear
Nodina sp. C8418	LN995410	Search Hit	Search Hit	AACATTATATTTTGTTTTTGGAGCCTGATCAGGAATAGTAGGAACATCCCTAAGCCTATTAATTCGAATCGAATTAGGAAATCCAGGAACTTTAATTGGTAACGATCAAATTTATAATACTATTGTTACCGCTCATGCTTTTATTATAATTTTCTTTATAGTAATACCAATTATAATCGGAGGATTTGGAAATTGACTTGTCCCTTTAATACTCGGAGCACCTGATATAGCTTTCCCTCGTTTAAATAATATAAGATTTTGACTTTTACCTCCTTCTTTAACTTTATTAATTATAAGAAGAATTGTAGAAAGAGGAGTAGGAACAGGTTGAACAGTTTATCCACCCTTATCTTCGAATATTGCTCACAGAGGATCAAGAGTTGATTTAGCCATCTTTAG…	1	1	1	657	657	657	657	657	1	forward	0	1314	2	0.852	0.852	0.315	LN995410	676.994	nr	0	AACATTATATTTTGTTTTTGGAGCCTGATCAGGAATAGTAGGAACATCCCTAAGCCTATTAATTCGAATCGAATTAGGAAATCCAGGAACTTTAATTGGTAACGATCAAATTTATAATACTATTGTTACCGCTCATGCTTTTATTATAATTTTCTTTATAGTAATACCAATTATAATCGGAGGATTTGGAAATTGACTTGTCCCTTTAATACTCGGAGCACCTGATATAGCTTTCCCTCGTTTAAATAATATAAGATTTTGACTTTTACCTCCTTCTTTAACTTTATTAATTATAAGAAGAATTGTAGAAAGAGGAGTAGGAACAGGTTGAACAGTTTATCCACCCTTATCTTCGAATATTGCTCACAGAGGATCAAGAGTTGATTTAGCCATCTTTAG…	TRUE	0.925	657	1	657	2	657	Fri Aug 04 11:37:06 SGT 2017	DNA	Colasposoma dauricum	1	Nodina sp. C8418	0.9985	657	1	-1	0	657	linear
Nodina sp. C8447	KF946194	Search Hit	Search Hit	TTTATTTTTGGAGCCTGAGCAGGAATAGTTGGTACCTCCCTAAGACTACTAATCCGAATTGAATTAGGTAATCCAGGAAC-CTTAATTGGAAACGATCAAATTTATAATACCATTGTAACTGCTCATGCCTTTATTATAATTTTTTTTATAGTAATACCAATCATAATTGGGGGATTCGGAAATTGATTAGTCCCCCTAATACTAGGAGCACCAGATATAGCATTTCCTCGAATAAATAATATAAGATTTTGATTACTCCCCCCATCATTAACTTTATTAATTATAAGAAGAATTGTTGAAAACGGTGTAGGAACTGGATGAACTGTTTATCCCCCCCTTTCTGCTAATATTGCCCATAGAGGTTCAAGAGTAGATTTAGCTATTTTCAGCCTACATTT…	1	11	1	648	659	648	648	649	1	forward	0	1296	2	0.846	0.846	0.338	KF946194	643.754	nr	1.52e-180	TTTATTTTTGGAGCCTGAGCAGGAATAGTTGGTACCTCCCTAAGACTACTAATCCGAATTGAATTAGGTAATCCAGGAACCTTAATTGGAAACGATCAAATTTATAATACCATTGTAACTGCTCATGCCTTTATTATAATTTTTTTTATAGTAATACCAATCATAATTGGGGGATTCGGAAATTGATTAGTCCCCCTAATACTAGGAGCACCAGATATAGCATTTCCTCGAATAAATAATATAAGATTTTGATTACTCCCCCCATCATTAACTTTATTAATTATAAGAAGAATTGTTGAAAACGGTGTAGGAACTGGATGAACTGTTTATCCCCCCCTTTCTGCTAATATTGCCCATAGAGGTTCAAGAGTAGATTTAGCTATTTTCAGCCTACATTTA…	TRUE	0.915	648	1	648	2	648	Fri Aug 04 11:37:06 SGT 2017	DNA	Eumolpinae sp.	1	Nodina sp. C8447	0.9833	658	11	-1	0	649	linear
Nodina sp. C8510	KF653259	Search Hit	Search Hit	TATATTTTATTTTTGGTGCATGATCAGGAATAGTAGGAACCTCCCTAAGCCTATTAATTCGAATTGAATTAGGAAACCCCGGAACCCTAATTGGAAATGACCAAATTTATAATACAATCGTAACTGCTCACGCATTTATCATAATTTTTTTTATAGTAATACCCATTATAATTGGAGGATTTGGAAACTGACTAGTCCCTCTAATACTTGGAGCTCCTGATATAGCATTCCCACGAATAAATAATATAAGATTTTGATTATTACCACCATCCCTTACTCTCTTAATTATAAGAAGAATTGTTGAAAATGGTGTGGGAACTGGATGAACAGTATACCCACCCCTTTCAGCTAATGTTGCACATAGAGGTTCAAGAGTAGATTTAGCAATTTTCAGATTAC…	1	6	3	646	652	648	646	647	1	forward	0	1292	2	0.839	0.839	0.35	KF653259	617.901	nr	9.24e-173	TATATTTTATTTTTGGTGCATGATCAGGAATAGTAGGAACCTCCCTAAGCCTATTAATTCGAATTGAATTAGGAAACCCCGGAACCCTAATTGGAAATGACCAAATTTATAATACAATCGTAACTGCTCACGCATTTATCATAATTTTTTTTATAGTAATACCCATTATAATTGGAGGATTTGGAAACTGACTAGTCCCTCTAATACTTGGAGCTCCTGATATAGCATTCCCACGAATAAATAATATAAGATTTTGATTATTACCACCATCCCTTACTCTCTTAATTATAAGAAGAATTGTTGAAAATGGTGTGGGAACTGGATGAACAGTATACCCACCCCTTTCAGCTAATGTTGCACATAGAGGTTCAAGAGTAGATTTAGCAATTTTCAGATTAC…	TRUE	0.908	648	3	646	2	646	Fri Aug 04 11:37:06 SGT 2017	DNA	Colaspidea globosa	1	Nodina sp. C8510	0.9758	651	6	-1	0	647	linear
Notosacantha sp. 1 C8312	KR424810	Search Hit	Search Hit	TATTTTATTTTTGGGTTCTGAGCAGGAATAGTTGGAACTTCTTTAAGAATAATAATCCGAACAGAATTAGGTAACCCTGGTACTCTAATTGGAAATGATCAAATTTATAATGTAATTATTACAGCTCATGCCTTCATTATAATTTTCTTTATAGTTATGCCAATTATAATTGGTGGATTCGGAAATTGATTAATTCCCTTAATATTAGGAGCCCCTGATATAGCTTTTCCACGATTGAATAATATAAGATTTTGGTTATTGCCCCCATCAATTTCAT-TTCTT-TTATTAAGAAGAATTGTAGAAAGAGGAGCTGGAACAGGATGAACTGTTTACCCCCCTCTATCTGCTAATATTGCCCATAGAGGATCATCTGTAGATTTAGCAATTTTTAGATTAC…	1	8	8	644	654	651	644	647	1	forward	0	1288	2	0.861	0.861	0.317	KR424810	691.767	nr	0	TATTTTATTTTTGGGTTCTGAGCAGGAATAGTTGGAACTTCTTTAAGAATAATAATCCGAACAGAATTAGGTAACCCTGGTACTCTAATTGGAAATGATCAAATTTATAATGTAATTATTACAGCTCATGCCTTCATTATAATTTTCTTTATAGTTATGCCAATTATAATTGGTGGATTCGGAAATTGATTAATTCCCTTAATATTAGGAGCCCCTGATATAGCTTTTCCACGATTGAATAATATAAGATTTTGGTTATTGCCCCCATCAATTTCATTTCTTTTATTAAGAAGAATTGTAGAAAGAGGAGCTGGAACAGGATGAACTGTTTACCCCCCTCTATCTGCTAATATTGCCCATAGAGGATCATCTGTAGATTTAGCAATTTTTAGATTACAC…	TRUE	0.918	651	8	644	2	644	Fri Aug 04 11:37:04 SGT 2017	DNA	Hispinae sp.	1	Notosacantha sp. 1 C8312	0.9758	651	8	-1	0	647	linear
Notosacantha sp. 2 C8540	KY845676	Search Hit	Search Hit	CTTTATTTTATTTTTGGTTTTTGATCAGGAATAGTTGGAACTTCATTAAGAATCTTAATTCGAACAGAATTAGGAAACCCTGGAACCCTAATTGGAAATGATCAAATTTACAATGTTATTGTTACAGCTCACGCATTTATTATAATTTTCTTTATAGTTATACCAATTATAATTGGAGGATTTGGAAATTGATTAGTTCCATTAATAATTGGAGCTCCTGATATAGCATTCCCACGACTTAACAATATAAGATTCTGACTTTTACCACCTTCAATTTTCCTTCTAATT-ATAAGAAGAATAGTTGAAAGAGGTGCAGGAACAGGATGAACTGTTTACCCACCTTTATCTGCCAACATCGCCCATAGGGGTGCATCAGTAGATTTAGCAATTTTTAGATT…	1	5	5	654	659	658	654	655	1	forward	0	1308	2	0.847	0.847	0.32	KY845676	654.834	nr	0	CTTTATTTTATTTTTGGTTTTTGATCAGGAATAGTTGGAACTTCATTAAGAATCTTAATTCGAACAGAATTAGGAAACCCTGGAACCCTAATTGGAAATGATCAAATTTACAATGTTATTGTTACAGCTCACGCATTTATTATAATTTTCTTTATAGTTATACCAATTATAATTGGAGGATTTGGAAATTGATTAGTTCCATTAATAATTGGAGCTCCTGATATAGCATTCCCACGACTTAACAATATAAGATTCTGACTTTTACCACCTTCAATTTTCCTTCTAATTATAAGAAGAATAGTTGAAAGAGGTGCAGGAACAGGATGAACTGTTTACCCACCTTTATCTGCCAACATCGCCCATAGGGGTGCATCAGTAGATTTAGCAATTTTTAGATTA…	TRUE	0.918	658	5	654	2	654	Fri Aug 04 11:37:04 SGT 2017	DNA	Dicladispa armigera	1	Notosacantha sp. 2 C8540	0.9879	658	5	-1	0	655	linear
Ochralea nigripes C8015	KR425397	Search Hit	Search Hit	AACTTTATATTTTATTTTTGGTGTTTGAGCTGGAATAGTAGGAACTTCTTTAAGAATCTTAATTCGAGCAGAATTAGGAAGACCTGGATCACTAATTGGAAATGATCAAATTTATAATGTTATTGTAACTGCCCATGCATTCATTATAATTTTTTTCATAGTAATGCCAATTATAATTGGAGGGTTTGGAAATTGATTAGTTCCATTAATAATTGGTGCCCCTGATATAGCTTTTCCTCGAATAAATAATATAAGATTTTGACTCCTACCTCCTTCATTATTCTTACTAATTATAAGAAGAGTCGTAGAAAGTGGAGCAGGAACTGGCTGAACTGTTTATCCTCCTTTATCATCTAATATTGCTCATGGTGGAGCTTCAGTAGATTTAGCTATTTTTAG…	1	1	1	658	658	658	658	658	1	forward	0	1316	2	0.897	0.897	0.319	KR425397	839.499	nr	0	AACTTTATATTTTATTTTTGGTGTTTGAGCTGGAATAGTAGGAACTTCTTTAAGAATCTTAATTCGAGCAGAATTAGGAAGACCTGGATCACTAATTGGAAATGATCAAATTTATAATGTTATTGTAACTGCCCATGCATTCATTATAATTTTTTTCATAGTAATGCCAATTATAATTGGAGGGTTTGGAAATTGATTAGTTCCATTAATAATTGGTGCCCCTGATATAGCTTTTCCTCGAATAAATAATATAAGATTTTGACTCCTACCTCCTTCATTATTCTTACTAATTATAAGAAGAGTCGTAGAAAGTGGAGCAGGAACTGGCTGAACTGTTTATCCTCCTTTATCATCTAATATTGCTCATGGTGGAGCTTCAGTAGATTTAGCTATTTTTAG…	TRUE	0.945	658	1	658	2	658	Fri Aug 04 11:37:10 SGT 2017	DNA	Galerucinae sp.	1	Ochralea nigripes C8015	0.994	658	1	-1	0	658	linear
Ochralea nigripes C8356	KF946261	Search Hit	Search Hit	TTTATTTTTGGTGTATGAGCTGGAATAGTTGGAACATCATTAAGAATTTTAATTCGAGCAGAATTAGGAAGACCTGGATCTTTAATTGGTAATGACCAAATTTATAATGTAATTGTAACAGCCCATGCATTCATTATAATTTTCTTCATAGTTATACCAATTATAATTGGAGGATTTGGAAATTGATTAGTTCCTCTAATAATTGGAGCACCAGATATAGCTTTCCCACGAATAAATAATATAAGATTTTGACTTCTTCCACCTTCTTTATTTTTATTAATTATAAGAAGAATTGTTGAAAGAGGTGCAGGAACTGGATGAACAGTTTATCCCCCGCTATCTTCAAACATTGCTCATGGAGGAGCTTCTGTTGATTTAGCAATTTTTAGATTACATCTT…	1	11	1	648	658	648	648	648	1	forward	0	1296	2	0.903	0.903	0.312	KF946261	848.732	nr	0	TTTATTTTTGGTGTATGAGCTGGAATAGTTGGAACATCATTAAGAATTTTAATTCGAGCAGAATTAGGAAGACCTGGATCTTTAATTGGTAATGACCAAATTTATAATGTAATTGTAACAGCCCATGCATTCATTATAATTTTCTTCATAGTTATACCAATTATAATTGGAGGATTTGGAAATTGATTAGTTCCTCTAATAATTGGAGCACCAGATATAGCTTTCCCACGAATAAATAATATAAGATTTTGACTTCTTCCACCTTCTTTATTTTTATTAATTATAAGAAGAATTGTTGAAAGAGGTGCAGGAACTGGATGAACAGTTTATCCCCCGCTATCTTCAAACATTGCTCATGGAGGAGCTTCTGTTGATTTAGCAATTTTTAGATTACATCTT…	TRUE	0.941	648	1	648	2	648	Fri Aug 04 11:37:09 SGT 2017	DNA	Galerucinae sp.	1	Ochralea nigripes C8356	0.9789	658	11	-1	0	648	linear
Ochralea nigripes C8362	KR425397	Search Hit	Search Hit	AACTTTATATTTTATTTTTGGTGTTTGAGCTGGAATAGTAGGAACTTCTTTAAGAATCTTAATTCGAGCAGAATTAGGAAGACCTGGATCACTAATTGGAAATGATCAAATTTATAATGTTATTGTAACTGCCCATGCATTCATTATAATTTTTTTCATAGTAATGCCAATTATAATTGGAGGGTTTGGAAATTGATTAGTTCCATTAATAATTGGTGCCCCTGATATAGCTTTTCCTCGAATAAATAATATAAGATTTTGACTCCTACCTCCTTCATTATTCTTACTAATTATAAGAAGAGTCGTAGAAAGTGGAGCAGGAACTGGCTGAACTGTTTATCCTCCTTTATCATCTAATATTGCTCATGGTGGAGCTTCAGTAGATTTAGCTATTTTTAG…	1	1	1	658	658	658	658	658	1	forward	0	1316	2	0.9	0.9	0.319	KR425397	850.579	nr	0	AACTTTATATTTTATTTTTGGTGTTTGAGCTGGAATAGTAGGAACTTCTTTAAGAATCTTAATTCGAGCAGAATTAGGAAGACCTGGATCACTAATTGGAAATGATCAAATTTATAATGTTATTGTAACTGCCCATGCATTCATTATAATTTTTTTCATAGTAATGCCAATTATAATTGGAGGGTTTGGAAATTGATTAGTTCCATTAATAATTGGTGCCCCTGATATAGCTTTTCCTCGAATAAATAATATAAGATTTTGACTCCTACCTCCTTCATTATTCTTACTAATTATAAGAAGAGTCGTAGAAAGTGGAGCAGGAACTGGCTGAACTGTTTATCCTCCTTTATCATCTAATATTGCTCATGGTGGAGCTTCAGTAGATTTAGCTATTTTTAG…	TRUE	0.947	658	1	658	2	658	Fri Aug 04 11:37:10 SGT 2017	DNA	Galerucinae sp.	1	Ochralea nigripes C8362	0.994	658	1	-1	0	658	linear
Ochralea nigripes C8408	KR425397	Search Hit	Search Hit	AACTTTATATTTTATTTTTGGTGTTTGAGCTGGAATAGTAGGAACTTCTTTAAGAATCTTAATTCGAGCAGAATTAGGAAGACCTGGATCACTAATTGGAAATGATCAAATTTATAATGTTATTGTAACTGCCCATGCATTCATTATAATTTTTTTCATAGTAATGCCAATTATAATTGGAGGGTTTGGAAATTGATTAGTTCCATTAATAATTGGTGCCCCTGATATAGCTTTTCCTCGAATAAATAATATAAGATTTTGACTCCTACCTCCTTCATTATTCTTACTAATTATAAGAAGAGTCGTAGAAAGTGGAGCAGGAACTGGCTGAACTGTTTATCCTCCTTTATCATCTAATATTGCTCATGGTGGAGCTTCAGTAGATTTAGCTATTTTTAG…	1	1	1	658	658	658	658	658	1	forward	0	1316	2	0.895	0.895	0.319	KR425397	833.959	nr	0	AACTTTATATTTTATTTTTGGTGTTTGAGCTGGAATAGTAGGAACTTCTTTAAGAATCTTAATTCGAGCAGAATTAGGAAGACCTGGATCACTAATTGGAAATGATCAAATTTATAATGTTATTGTAACTGCCCATGCATTCATTATAATTTTTTTCATAGTAATGCCAATTATAATTGGAGGGTTTGGAAATTGATTAGTTCCATTAATAATTGGTGCCCCTGATATAGCTTTTCCTCGAATAAATAATATAAGATTTTGACTCCTACCTCCTTCATTATTCTTACTAATTATAAGAAGAGTCGTAGAAAGTGGAGCAGGAACTGGCTGAACTGTTTATCCTCCTTTATCATCTAATATTGCTCATGGTGGAGCTTCAGTAGATTTAGCTATTTTTAG…	TRUE	0.945	658	1	658	2	658	Fri Aug 04 11:37:09 SGT 2017	DNA	Galerucinae sp.	1	Ochralea nigripes C8408	0.994	658	1	-1	0	658	linear
Ochralea nigripes C8411	KR425397	Search Hit	Search Hit	AACTTTATATTTTATTTTTGGTGTTTGAGCTGGAATAGTAGGAACTTCTTTAAGAATCTTAATTCGAGCAGAATTAGGAAGACCTGGATCACTAATTGGAAATGATCAAATTTATAATGTTATTGTAACTGCCCATGCATTCATTATAATTTTTTTCATAGTAATGCCAATTATAATTGGAGGGTTTGGAAATTGATTAGTTCCATTAATAATTGGTGCCCCTGATATAGCTTTTCCTCGAATAAATAATATAAGATTTTGACTCCTACCTCCTTCATTATTCTTACTAATTATAAGAAGAGTCGTAGAAAGTGGAGCAGGAACTGGCTGAACTGTTTATCCTCCTTTATCATCTAATATTGCTCATGGTGGAGCTTCAGTAGATTTAGCTATTTTTAG…	1	1	1	658	658	658	658	658	1	forward	0	1316	2	0.898	0.898	0.319	KR425397	845.039	nr	0	AACTTTATATTTTATTTTTGGTGTTTGAGCTGGAATAGTAGGAACTTCTTTAAGAATCTTAATTCGAGCAGAATTAGGAAGACCTGGATCACTAATTGGAAATGATCAAATTTATAATGTTATTGTAACTGCCCATGCATTCATTATAATTTTTTTCATAGTAATGCCAATTATAATTGGAGGGTTTGGAAATTGATTAGTTCCATTAATAATTGGTGCCCCTGATATAGCTTTTCCTCGAATAAATAATATAAGATTTTGACTCCTACCTCCTTCATTATTCTTACTAATTATAAGAAGAGTCGTAGAAAGTGGAGCAGGAACTGGCTGAACTGTTTATCCTCCTTTATCATCTAATATTGCTCATGGTGGAGCTTCAGTAGATTTAGCTATTTTTAG…	TRUE	0.947	658	1	658	2	658	Fri Aug 04 11:37:10 SGT 2017	DNA	Galerucinae sp.	1	Ochralea nigripes C8411	0.9955	658	1	-1	0	658	linear
Pagria sp. C9479	KF946272	Search Hit	Search Hit	TTTATTTTTGGAGCCTGATCAGGAATAGTAGGAACTTCCCTAAGCCTATTAATTCGTATTGAATTAGGAAATCCAGGAACCTTAATCGGCAATGATCAAATTTATAATACTATTGTAACTGCTCATGCTTTTATTATAATTTTTTTTATAGTTATACCAATTATAATTGGAGGATTTGGAAATTGACTAGTACCCCTAATACTAGGAGCCCCAGATATAGCCTTCCCACGAATAAACAACATAAGTTTTTGACTTCTTCCCCCATCATTAACCCTATTAATCATGAGAAGAATTGTTGAAAACGGGGTAGGAACAGGCTGAACAGTATACCCTCCCCTTTCCGCTAACATTGCCCATAGAGGATCTAGAGTTGACCTAGCAATTTTTAGACTTCATTTA…	1	11	1	642	652	642	642	642	1	forward	0	1284	2	0.871	0.871	0.361	KF946272	726.854	nr	0	TTTATTTTTGGAGCCTGATCAGGAATAGTAGGAACTTCCCTAAGCCTATTAATTCGTATTGAATTAGGAAATCCAGGAACCTTAATCGGCAATGATCAAATTTATAATACTATTGTAACTGCTCATGCTTTTATTATAATTTTTTTTATAGTTATACCAATTATAATTGGAGGATTTGGAAATTGACTAGTACCCCTAATACTAGGAGCCCCAGATATAGCCTTCCCACGAATAAACAACATAAGTTTTTGACTTCTTCCCCCATCATTAACCCTATTAATCATGAGAAGAATTGTTGAAAACGGGGTAGGAACAGGCTGAACAGTATACCCTCCCCTTTCCGCTAACATTGCCCATAGAGGATCTAGAGTTGACCTAGCAATTTTTAGACTTCATTTA…	TRUE	0.922	642	1	642	2	642	Fri Aug 04 11:37:06 SGT 2017	DNA	Eumolpinae sp.	1	Pagria sp. C9479	0.9742	652	11	-1	0	642	linear
Phola sedecimpustulata C9882	KR425406	Search Hit	Search Hit	ACTTTATATTTTATTTTTGGAATTTGAGCTGGAATAGTAGGAACTTCTTTAAGAATTTTAATTCGAGCTGAATTAGGAAA-CCCAGGATCATTAATTGGAAATGATCAAATTTATAATGTTATTGTAACTGCCCATGCATTCATTATAATTTTTTTCATAGTAATACCAATTATAATTGGAGGATTTGGAAATTGATTAG-TCCCACTAATAATTGGTGCTCCAGATATAGCTTTCCCTCGAATAAATAATATAAGATTTTGATTATTACCTCCTTCTTTATTTTTACTAATTATAAGAAGAGTTGTAGAAAGAGGAGCAGGTACTGGATGAACAGTTTATCCTCCCCTATCATCAAATATTGCTCATAGAGGAGCTTCTGTTGATTTAGCAATTTTTA…	1	2	2	656	660	657	656	659	1	forward	0	1312	2	0.862	0.862	0.302	KR425406	708.387	nr	0	ACTTTATATTTTATTTTTGGAATTTGAGCTGGAATAGTAGGAACTTCTTTAAGAATTTTAATTCGAGCTGAATTAGGAAACCCAGGATCATTAATTGGAAATGATCAAATTTATAATGTTATTGTAACTGCCCATGCATTCATTATAATTTTTTTCATAGTAATACCAATTATAATTGGAGGATTTGGAAATTGATTAGTCCCACTAATAATTGGTGCTCCAGATATAGCTTTCCCTCGAATAAATAATATAAGATTTTGATTATTACCTCCTTCTTTATTTTTACTAATTATAAGAAGAGTTGTAGAAAGAGGAGCAGGTACTGGATGAACAGTTTATCCTCCCCTATCATCAAATATTGCTCATAGAGGAGCTTCTGTTGATTTAGCAATTTTTAGT…	TRUE	0.926	657	2	656	2	656	Fri Aug 04 11:37:05 SGT 2017	DNA	Galerucinae sp.	1	Phola sedecimpustulata C9882	0.9909	657	2	-1	0	659	linear
Plagiodera sp. C8514	KU188452	Search Hit	Search Hit	AACCTTATACTTCATTTTTGGAATTTGAGCAGGAATAGTAGGAACTTCCCTAAGAATTTTAATTCGAGCTGAATTAGGAAACCCTGGATCATTAATTGGAAATGATCAAATTTATAATGTAATTGTAACAGCCCATGCATTCATTATAATTTTCTTTATAGTTATGCCAATTATGATTGGTGGATTTGGAAACTGATTAGTACCCTTAATAATCGGTGCCCCAGATATAGCTTTCCCTCGATTAAATAATATAAGATTCTGGTTACTTCCACCTTCCTTATTTTTACTACTAATAAGAAGAATTGTAGAAAATGGTGCAGGGACAGGTTGAACAGTATACCCACCTTTATCCACTAATATTGCGCATAGAGGTTCTTCAGTAGATTTAGCTATTTTCAG…	1	1	1	657	657	657	657	657	1	forward	0	1314	2	0.872	0.872	0.327	KU188452	749.013	nr	0	AACCTTATACTTCATTTTTGGAATTTGAGCAGGAATAGTAGGAACTTCCCTAAGAATTTTAATTCGAGCTGAATTAGGAAACCCTGGATCATTAATTGGAAATGATCAAATTTATAATGTAATTGTAACAGCCCATGCATTCATTATAATTTTCTTTATAGTTATGCCAATTATGATTGGTGGATTTGGAAACTGATTAGTACCCTTAATAATCGGTGCCCCAGATATAGCTTTCCCTCGATTAAATAATATAAGATTCTGGTTACTTCCACCTTCCTTATTTTTACTACTAATAAGAAGAATTGTAGAAAATGGTGCAGGGACAGGTTGAACAGTATACCCACCTTTATCCACTAATATTGCGCATAGAGGTTCTTCAGTAGATTTAGCTATTTTCAG…	TRUE	0.932	657	1	657	2	657	Fri Aug 04 11:37:05 SGT 2017	DNA	Chrysomela vigintipunctata	1	Plagiodera sp. C8514	0.9924	657	1	-1	0	657	linear
Rhyparida sp. 1 C6939	KF946450	Search Hit	Search Hit	TTTGTTTTTGGAGCTTGATCAGGAATAGTAGGAACCTCCCTTAGTCTGCTAATTCGAATTGAGCTTGGAAACCCCGGAACTTTAATTGGAAATGATCAAATTTATAATACAATTGTTACAGCCCATGCCTTTATTATAATTTTCTTCATAGTGATGCCAATCATAATTGGTGGATTCGGAAACTGGTTAGTCCCCCTAATACTAGGAGCTCCTGATATAGCCTTTCCTCGGATAAATAACATAAGGTTCTGACTTCTCCCCCCATCTTTAACACTTCTAATTATAAGAAGAATTGTTGAAAACGGAGTCGGAACCGGGTGGACTGTCTACCCGCCTCTCTCAGCTAATATCGCCCACAGAGGATCTAGAGTAGATCTAGCTATTTTTAGTCTCCATTTA…	1	11	1	647	658	647	647	648	1	forward	0	1294	2	0.826	0.826	0.403	KF946450	569.888	nr	2.62e-158	TTTGTTTTTGGAGCTTGATCAGGAATAGTAGGAACCTCCCTTAGTCTGCTAATTCGAATTGAGCTTGGAAACCCCGGAACTTTAATTGGAAATGATCAAATTTATAATACAATTGTTACAGCCCATGCCTTTATTATAATTTTCTTCATAGTGATGCCAATCATAATTGGTGGATTCGGAAACTGGTTAGTCCCCCTAATACTAGGAGCTCCTGATATAGCCTTTCCTCGGATAAATAACATAAGGTTCTGACTTCTCCCCCCATCTTTAACACTTCTAATTATAAGAAGAATTGTTGAAAACGGAGTCGGAACCGGGTGGACTGTCTACCCGCCTCTCTCAGCTAATATCGCCCACAGAGGATCTAGAGTAGATCTAGCTATTTTTAGTCTCCATTTA…	TRUE	0.901	647	1	647	2	647	Fri Aug 04 11:37:06 SGT 2017	DNA	Eumolpinae sp.	1	Rhyparida sp. 1 C6939	0.9773	657	11	-1	0	648	linear
Rhyparida sp. 1 C8063	KF946450	Search Hit	Search Hit	TTTGTTTTTGGAGCTTGATCAGGAATAGTAGGAACCTCCCTTAGTCTGCTAATTCGAATTGAGCTTGGAAACCCCGGAACTTTAATTGGAAATGATCAAATTTATAATACAATTGTTACAGCCCATGCCTTTATTATAATTTTCTTCATAGTGATGCCAATCATAATTGGTGGATTCGGAAACTGGTTAGTCCCCCTAATACTAGGAGCTCCTGATATAGCCTTTCCTCGGATAAATAACATAAGGTTCTGACTTCTCCCCCCATCTTTAACACTTCTAATTATAAGAAGAATTGTTGAAAACGGAGTCGGAACCGGGTGGACTGTCTACCCGCCTCTCTCAGCTAATATCGCCCACAGAGGATCTAGAGTAGATCTAGCTATTTTTAGTCTCCATTTA…	1	11	1	647	658	647	647	648	1	forward	0	1294	2	0.826	0.826	0.403	KF946450	569.888	nr	2.62e-158	TTTGTTTTTGGAGCTTGATCAGGAATAGTAGGAACCTCCCTTAGTCTGCTAATTCGAATTGAGCTTGGAAACCCCGGAACTTTAATTGGAAATGATCAAATTTATAATACAATTGTTACAGCCCATGCCTTTATTATAATTTTCTTCATAGTGATGCCAATCATAATTGGTGGATTCGGAAACTGGTTAGTCCCCCTAATACTAGGAGCTCCTGATATAGCCTTTCCTCGGATAAATAACATAAGGTTCTGACTTCTCCCCCCATCTTTAACACTTCTAATTATAAGAAGAATTGTTGAAAACGGAGTCGGAACCGGGTGGACTGTCTACCCGCCTCTCTCAGCTAATATCGCCCACAGAGGATCTAGAGTAGATCTAGCTATTTTTAGTCTCCATTTA…	TRUE	0.901	647	1	647	2	647	Fri Aug 04 11:37:06 SGT 2017	DNA	Eumolpinae sp.	1	Rhyparida sp. 1 C8063	0.9773	657	11	-1	0	648	linear
Rhyparida sp. 1 C8355	KF946450	Search Hit	Search Hit	TTTGTTTTTGGAGCTTGATCAGGAATAGTAGGAACCTCCCTTAGTCTGCTAATTCGAATTGAGCTTGGAAACCCCGGAACTTTAATTGGAAATGATCAAATTTATAATACAATTGTTACAGCCCATGCCTTTATTATAATTTTCTTCATAGTGATGCCAATCATAATTGGTGGATTCGGAAACTGGTTAGTCCCCCTAATACTAGGAGCTCCTGATATAGCCTTTCCTCGGATAAATAACATAAGGTTCTGACTTCTCCCCCCATCTTTAACACTTCTAATTATAAGAAGAATTGTTGAAAACGGAGTCGGAACCGGGTGGACTGTCTACCCGCCTCTCTCAGCTAATATCGCCCACAGAGGATCTAGAGTAGATCTAGCTATTTTTAGTCTCCATTTA…	1	11	1	647	658	647	647	648	1	forward	0	1294	2	0.83	0.83	0.403	KF946450	586.508	nr	2.61e-163	TTTGTTTTTGGAGCTTGATCAGGAATAGTAGGAACCTCCCTTAGTCTGCTAATTCGAATTGAGCTTGGAAACCCCGGAACTTTAATTGGAAATGATCAAATTTATAATACAATTGTTACAGCCCATGCCTTTATTATAATTTTCTTCATAGTGATGCCAATCATAATTGGTGGATTCGGAAACTGGTTAGTCCCCCTAATACTAGGAGCTCCTGATATAGCCTTTCCTCGGATAAATAACATAAGGTTCTGACTTCTCCCCCCATCTTTAACACTTCTAATTATAAGAAGAATTGTTGAAAACGGAGTCGGAACCGGGTGGACTGTCTACCCGCCTCTCTCAGCTAATATCGCCCACAGAGGATCTAGAGTAGATCTAGCTATTTTTAGTCTCCATTTA…	TRUE	0.905	647	1	647	2	647	Fri Aug 04 11:37:06 SGT 2017	DNA	Eumolpinae sp.	1	Rhyparida sp. 1 C8355	0.9788	657	11	-1	0	648	linear
Rhyparida sp. 1 C8422	KF946450	Search Hit	Search Hit	TTTGTTTTTGGAGCTTGATCAGGAATAGTAGGAACCTCCCTTAGTCTGCTAATTCGAATTGAGCTTGGAAACCCCGGAACTTTAATTGGAAATGATCAAATTTATAATACAATTGTTACAGCCCATGCCTTTATTATAATTTTCTTCATAGTGATGCCAATCATAATTGGTGGATTCGGAAACTGGTTAGTCCCCCTAATACTAGGAGCTCCTGATATAGCCTTTCCTCGGATAAATAACATAAGGTTCTGACTTCTCCCCCCATCTTTAACACTTCTAATTATAAGAAGAATTGTTGAAAACGGAGTCGGAACCGGGTGGACTGTCTACCCGCCTCTCTCAGCTAATATCGCCCACAGAGGATCTAGAGTAGATCTAGCTATTTTTAGTCTCCATTTA…	1	11	1	647	658	647	647	648	1	forward	0	1294	2	0.829	0.829	0.403	KF946450	580.968	nr	1.21e-161	TTTGTTTTTGGAGCTTGATCAGGAATAGTAGGAACCTCCCTTAGTCTGCTAATTCGAATTGAGCTTGGAAACCCCGGAACTTTAATTGGAAATGATCAAATTTATAATACAATTGTTACAGCCCATGCCTTTATTATAATTTTCTTCATAGTGATGCCAATCATAATTGGTGGATTCGGAAACTGGTTAGTCCCCCTAATACTAGGAGCTCCTGATATAGCCTTTCCTCGGATAAATAACATAAGGTTCTGACTTCTCCCCCCATCTTTAACACTTCTAATTATAAGAAGAATTGTTGAAAACGGAGTCGGAACCGGGTGGACTGTCTACCCGCCTCTCTCAGCTAATATCGCCCACAGAGGATCTAGAGTAGATCTAGCTATTTTTAGTCTCCATTTA…	TRUE	0.905	647	1	647	2	647	Fri Aug 04 11:37:06 SGT 2017	DNA	Eumolpinae sp.	1	Rhyparida sp. 1 C8422	0.9818	657	11	-1	0	648	linear
Rhyparida sp. 1 C8450	KF946450	Search Hit	Search Hit	TTTGTTTTTGGAGCTTGATCAGGAATAGTAGGAACCTCCCTTAGTCTGCTAATTCGAATTGAGCTTGGAAACCCCGGAACTTTAATTGGAAATGATCAAATTTATAATACAATTGTTACAGCCCATGCCTTTATTATAATTTTCTTCATAGTGATGCCAATCATAATTGGTGGATTCGGAAACTGGTTAGTCCCCCTAATACTAGGAGCTCCTGATATAGCCTTTCCTCGGATAAATAACATAAGGTTCTGACTTCTCCCCCCATCTTTAACACTTCTAATTATAAGAAGAATTGTTGAAAACGGAGTCGGAACCGGGTGGACTGTCTACCCGCCTCTCTCAGCTAATATCGCCCACAGAGGATCTAGAGTAGATCTAGCTATTTTTAGTCTCCATTTA…	1	11	1	647	658	647	647	648	1	forward	0	1294	2	0.827	0.827	0.403	KF946450	575.428	nr	5.64e-160	TTTGTTTTTGGAGCTTGATCAGGAATAGTAGGAACCTCCCTTAGTCTGCTAATTCGAATTGAGCTTGGAAACCCCGGAACTTTAATTGGAAATGATCAAATTTATAATACAATTGTTACAGCCCATGCCTTTATTATAATTTTCTTCATAGTGATGCCAATCATAATTGGTGGATTCGGAAACTGGTTAGTCCCCCTAATACTAGGAGCTCCTGATATAGCCTTTCCTCGGATAAATAACATAAGGTTCTGACTTCTCCCCCCATCTTTAACACTTCTAATTATAAGAAGAATTGTTGAAAACGGAGTCGGAACCGGGTGGACTGTCTACCCGCCTCTCTCAGCTAATATCGCCCACAGAGGATCTAGAGTAGATCTAGCTATTTTTAGTCTCCATTTA…	TRUE	0.904	647	1	647	2	647	Fri Aug 04 11:37:06 SGT 2017	DNA	Eumolpinae sp.	1	Rhyparida sp. 1 C8450	0.9803	657	11	-1	0	648	linear
Rhyparida sp. 1 C8470	KF946450	Search Hit	Search Hit	TTTGTTTTTGGAGCTTGATCAGGAATAGTAGGAACCTCCCTTAGTCTGCTAATTCGAATTGAGCTTGGAAACCCCGGAACTTTAATTGGAAATGATCAAATTTATAATACAATTGTTACAGCCCATGCCTTTATTATAATTTTCTTCATAGTGATGCCAATCATAATTGGTGGATTCGGAAACTGGTTAGTCCCCCTAATACTAGGAGCTCCTGATATAGCCTTTCCTCGGATAAATAACATAAGGTTCTGACTTCTCCCCCCATCTTTAACACTTCTAATTATAAGAAGAATTGTTGAAAACGGAGTCGGAACCGGGTGGACTGTCTACCCGCCTCTCTCAGCTAATATCGCCCACAGAGGATCTAGAGTAGATCTAGCTATTTTTAGTCTCCATTTA…	1	11	1	647	658	647	647	648	1	forward	0	1294	2	0.827	0.827	0.403	KF946450	575.428	nr	5.64e-160	TTTGTTTTTGGAGCTTGATCAGGAATAGTAGGAACCTCCCTTAGTCTGCTAATTCGAATTGAGCTTGGAAACCCCGGAACTTTAATTGGAAATGATCAAATTTATAATACAATTGTTACAGCCCATGCCTTTATTATAATTTTCTTCATAGTGATGCCAATCATAATTGGTGGATTCGGAAACTGGTTAGTCCCCCTAATACTAGGAGCTCCTGATATAGCCTTTCCTCGGATAAATAACATAAGGTTCTGACTTCTCCCCCCATCTTTAACACTTCTAATTATAAGAAGAATTGTTGAAAACGGAGTCGGAACCGGGTGGACTGTCTACCCGCCTCTCTCAGCTAATATCGCCCACAGAGGATCTAGAGTAGATCTAGCTATTTTTAGTCTCCATTTA…	TRUE	0.902	647	1	647	2	647	Fri Aug 04 11:37:06 SGT 2017	DNA	Eumolpinae sp.	1	Rhyparida sp. 1 C8470	0.9773	657	11	-1	0	648	linear
Rhyparida sp. 1 C8508	KF946450	Search Hit	Search Hit	TTTGTTTTTGGAGCTTGATCAGGAATAGTAGGAACCTCCCTTAGTCTGCTAATTCGAATTGAGCTTGGAAACCCCGGAACTTTAATTGGAAATGATCAAATTTATAATACAATTGTTACAGCCCATGCCTTTATTATAATTTTCTTCATAGTGATGCCAATCATAATTGGTGGATTCGGAAACTGGTTAGTCCCCCTAATACTAGGAGCTCCTGATATAGCCTTTCCTCGGATAAATAACATAAGGTTCTGACTTCTCCCCCCATCTTTAACACTTCTAATTATAAGAAGAATTGTTGAAAACGGAGTCGGAACCGGGTGGACTGTCTACCCGCCTCTCTCAGCTAATATCGCCCACAGAGGATCTAGAGTAGATCTAGCTATTTTTAGTCTCCATTTA…	1	11	1	647	658	647	647	648	1	forward	0	1294	2	0.829	0.829	0.403	KF946450	580.968	nr	1.21e-161	TTTGTTTTTGGAGCTTGATCAGGAATAGTAGGAACCTCCCTTAGTCTGCTAATTCGAATTGAGCTTGGAAACCCCGGAACTTTAATTGGAAATGATCAAATTTATAATACAATTGTTACAGCCCATGCCTTTATTATAATTTTCTTCATAGTGATGCCAATCATAATTGGTGGATTCGGAAACTGGTTAGTCCCCCTAATACTAGGAGCTCCTGATATAGCCTTTCCTCGGATAAATAACATAAGGTTCTGACTTCTCCCCCCATCTTTAACACTTCTAATTATAAGAAGAATTGTTGAAAACGGAGTCGGAACCGGGTGGACTGTCTACCCGCCTCTCTCAGCTAATATCGCCCACAGAGGATCTAGAGTAGATCTAGCTATTTTTAGTCTCCATTTA…	TRUE	0.904	647	1	647	2	647	Fri Aug 04 11:37:06 SGT 2017	DNA	Eumolpinae sp.	1	Rhyparida sp. 1 C8508	0.9788	657	11	-1	0	648	linear
Rhyparida sp. 2 C8262	KF946328	Search Hit	Search Hit	TTT-GTTTTTGGAGCTTGATCAGGAATAGTAGGAACCTCTCTCAGCCTATTAATTCGAATTGAGCTTGGAAACCCTGGCACTTTAATTGGTAATGACCAAATTTATAACACAATTGTAACAGCTCATGCTTTTATCATAATTTTCTTCATAGTAATACCTATTATAATCGGGGGATTCGGGAATTGACTTGTACCCTTAATACTAGGAGCACCTGATATAGCTTTTCCTCGAATAAATAACATGAGATTCTGGCTTCTACCTCCATCGCTAACTCTTTTAATTATAAGAAGAATTGTTGAAAACGGAGTAGGGACTGGATGAACCGTTTACCCGCCTTTATCTGCTAATATTGCCCATAGAGGATCTAGAGTAGATCTAGCAATTTTTAGATTACACCT…	1	10	1	648	658	648	648	649	1	forward	0	1297	2	0.832	0.832	0.373	KF946328	593.895	nr	1.56e-165	TTTGTTTTTGGAGCTTGATCAGGAATAGTAGGAACCTCTCTCAGCCTATTAATTCGAATTGAGCTTGGAAACCCTGGCACTTTAATTGGTAATGACCAAATTTATAACACAATTGTAACAGCTCATGCTTTTATCATAATTTTCTTCATAGTAATACCTATTATAATCGGGGGATTCGGGAATTGACTTGTACCCTTAATACTAGGAGCACCTGATATAGCTTTTCCTCGAATAAATAACATGAGATTCTGGCTTCTACCTCCATCGCTAACTCTTTTAATTATAAGAAGAATTGTTGAAAACGGAGTAGGGACTGGATGAACCGTTTACCCGCCTTTATCTGCTAATATTGCCCATAGAGGATCTAGAGTAGATCTAGCAATTTTTAGATTACACCTA…	TRUE	0.908	648	1	649	2	648	Fri Aug 04 11:37:06 SGT 2017	DNA	Eumolpinae sp.	1	Rhyparida sp. 2 C8262	0.9848	658	10	-1	0	649	linear
Scelodonta granulosa C9531	KM842629	Search Hit	Search Hit	TACACTTTATTTCATTTTTGGTGCATGATCTGGGATAGTTGGTACTTCTTTAAGACTTCTAATTCGAATTGAATTAGGAAACCCAGGATCGCTAATCGGAAATGACCAAATTTATAATACAATTGTAACAGCCCACGCTTTCATTATAATTTTCTTTATAGTTATACCCATTATAATTGGGGGGTTCGGGAACTGACTTGTCCCCCTAATATTAGGTGCCCCTGATATAGCGTTTCCTCGTATAAACAACATAAGCTTTTGACTACTCCCCCCCTCTCTAAGGCTTTTAGTTATAAGAAGAATTGTAGAAAATGGTGCAGGAACAGGATGAACAGTGTACCCCCCACTATCATCAAATATTGCCCATAGAGGATCAAGAGTTGATCTAGCTATTTTCAG…	1	1	1	657	657	657	657	657	1	forward	0	1314	2	0.84	0.84	0.381	KM842629	632.674	nr	3.3e-177	TACACTTTATTTCATTTTTGGTGCATGATCTGGGATAGTTGGTACTTCTTTAAGACTTCTAATTCGAATTGAATTAGGAAACCCAGGATCGCTAATCGGAAATGACCAAATTTATAATACAATTGTAACAGCCCACGCTTTCATTATAATTTTCTTTATAGTTATACCCATTATAATTGGGGGGTTCGGGAACTGACTTGTCCCCCTAATATTAGGTGCCCCTGATATAGCGTTTCCTCGTATAAACAACATAAGCTTTTGACTACTCCCCCCCTCTCTAAGGCTTTTAGTTATAAGAAGAATTGTAGAAAATGGTGCAGGAACAGGATGAACAGTGTACCCCCCACTATCATCAAATATTGCCCATAGAGGATCAAGAGTTGATCTAGCTATTTTCAG…	TRUE	0.917	657	1	657	2	657	Fri Aug 04 11:37:07 SGT 2017	DNA	Chrysomelidae sp.	1	Scelodonta granulosa C9531	0.9939	657	1	-1	0	657	linear
Schenklingia sp. C9429	KR486778	Search Hit	Search Hit	AACATTATATTTTATTTTTGGTATTTGATCTGGGATAATTGGAACTTCACTAAGAATTATAATCCGAGCCGAATTAGGAAGACCCGGGTCTTTAATTGGGAATGACCAGATTTATAATGTTATTGTAACTGCTCATGCCTTTATTATAATTTTTTTTATAGTAATACCTATTATAATCGGGGGATTTGGAAATTGATTAGTCCCCCTTATAATTGG-AGCCCCTGATATAGCTTTCCCTCGAATAAATAACATAAGATTTTGATTATTACCCCCATCATTATTTTTGTTATTAATAAGAAGAATAGTTGAAAGAGGTGCTGGAACAGGATGAACAGTTTACCCCCCCCTGTCTTCTAATATCGCCCATAGAGGATCTTCTGTTGATTTAGCAATTTTTA…	1	1	1	657	658	657	657	658	1	forward	0	1314	2	0.848	0.848	0.327	KR486778	660.374	nr	0	AACATTATATTTTATTTTTGGTATTTGATCTGGGATAATTGGAACTTCACTAAGAATTATAATCCGAGCCGAATTAGGAAGACCCGGGTCTTTAATTGGGAATGACCAGATTTATAATGTTATTGTAACTGCTCATGCCTTTATTATAATTTTTTTTATAGTAATACCTATTATAATCGGGGGATTTGGAAATTGATTAGTCCCCCTTATAATTGGAGCCCCTGATATAGCTTTCCCTCGAATAAATAACATAAGATTTTGATTATTACCCCCATCATTATTTTTGTTATTAATAAGAAGAATAGTTGAAAGAGGTGCTGGAACAGGATGAACAGTTTACCCCCCCCTGTCTTCTAATATCGCCCATAGAGGATCTTCTGTTGATTTAGCAATTTTTAG…	TRUE	0.92	657	1	657	2	657	Fri Aug 04 11:37:11 SGT 2017	DNA	Psylliodes cucullatus	1	Schenklingia sp. C9429	0.9924	657	1	-1	0	658	linear
Strobiderus sp. C6995	KF653250	Search Hit	Search Hit	TTATACTTTATTTTTGGAATTTGATCAGGAATAGTAGGAACTTCTCTCAGAATCTTAATTCGAGCTGAATTAGGAAGACCTGGATCCTTAATTGGAAATGACCAAATTTATAACGTCATTGTTACTGCACATGCATTTATTATAATTTTTTTTATAGTAATACCAATTATGATTGGGGGGTTTGGAAATTGATTAGTCCCTCTAATAATTGGAGCTCCCGATATAGCCTTTCCTCGAATAAATAATATAAGATTTTGATTATTACCCCCATCATTACTATTATTATTAATAAGAAGAATGGTTGAAAGAGGAGCTGGGACAGGATGAACTGTTTATCCACCCCTTTCTTCTAATATCGCTCATGGAGGATCCTCTGTAGATTTAGCTATTTTTAGACTT…	1	5	2	654	658	655	654	654	1	forward	0	1308	2	0.855	0.855	0.32	KF653250	682.534	nr	0	TTATACTTTATTTTTGGAATTTGATCAGGAATAGTAGGAACTTCTCTCAGAATCTTAATTCGAGCTGAATTAGGAAGACCTGGATCCTTAATTGGAAATGACCAAATTTATAACGTCATTGTTACTGCACATGCATTTATTATAATTTTTTTTATAGTAATACCAATTATGATTGGGGGGTTTGGAAATTGATTAGTCCCTCTAATAATTGGAGCTCCCGATATAGCCTTTCCTCGAATAAATAATATAAGATTTTGATTATTACCCCCATCATTACTATTATTATTAATAAGAAGAATGGTTGAAAGAGGAGCTGGGACAGGATGAACTGTTTATCCACCCCTTTCTTCTAATATCGCTCATGGAGGATCCTCTGTAGATTTAGCTATTTTTAGACTT…	TRUE	0.921	655	2	654	2	654	Fri Aug 04 11:37:11 SGT 2017	DNA	Psylliodes chrysocephalus	1	Strobiderus sp. C6995	0.9879	658	5	-1	0	654	linear
Sumatrasia sp. C6938	KX943391	Search Hit	Search Hit	ACTTTATATTTTATTTTTGGAATTTGAGCAGGAATAGTTGGAACTTCCTTAAGAATCTTAATTCGAACAGAATTAGGAAACCCCGGATCTTTAATTGGAAATGACCAAATTTACAATGTTATTGTAACAGCTCATGCTTTTATTATAATTTTTTTTATAGTAATACCAATTATAATTGGTGGATTTGGAAATTGATTAGTCCCTTTAATAATTGGTGCCCCAGATATAGC-TTTCCCACGAATAAATAATATAAGATTTTGGCTATTACCCCCATC-TTTATTCTTCTTAATTATAAGAAGAATTGTAGAAAATGGAGCTGGTACAGGATGAACTGTTTACCCCCCTTTATCCTCTAATATTGCCCATGGAGGATCTTCTGTTGATCTAGCCATTTTTA…	1	2	2192	661	665	2852	661	664	1	forward	0	1322	2	0.858	0.858	0.316	KX943391	701.001	nr	0	ACTTTATATTTTATTTTTGGAATTTGAGCAGGAATAGTTGGAACTTCCTTAAGAATCTTAATTCGAACAGAATTAGGAAACCCCGGATCTTTAATTGGAAATGACCAAATTTACAATGTTATTGTAACAGCTCATGCTTTTATTATAATTTTTTTTATAGTAATACCAATTATAATTGGTGGATTTGGAAATTGATTAGTCCCTTTAATAATTGGTGCCCCAGATATAGCTTTCCCACGAATAAATAATATAAGATTTTGGCTATTACCCCCATCTTTATTCTTCTTAATTATAAGAAGAATTGTAGAAAATGGAGCTGGTACAGGATGAACTGTTTACCCCCCTTTATCCTCTAATATTGCCCATGGAGGATCTTCTGTTGATCTAGCCATTTTTAGT…	TRUE	0.928	2852	2192	661	2	661	Fri Aug 04 11:37:12 SGT 2017	DNA	Longitarsus parvulus	1	Sumatrasia sp. C6938	0.9985	662	2	-1	0	664	linear
