# Supplementary material for: Investigating leaf beetles (Coleoptera, Chrysomelidae) on the west coast islands of Sabah via checklist-taking and DNA barcoding
Source: PeerJ. 2018 Oct 25;6:e5811. doi: 10.7717/peerj.5811 (PMC6204241; doi:10.7717/peerj.5811)
Supplement: Supplemental Information 7 [file peerj-06-5811-s007.xlsx]

## Sheet: checklist1
Taxonomic_name_(Name)	Note	BORCOL coll	Subfamily	BIN
Altica aenea	Pulau Tiga	BOR/COL 08071	Galerucinae	BOLD:AAP8616
Altica aenea	Pulau Gaya	BOR/COL 08166	Galerucinae	BOLD:AAP8616
Altica aenea	Pulau Gaya	BOR/COL 08173	Galerucinae	BOLD:AAP8616
Altica aenea	Pulau Gaya	BOR/COL 09444	Galerucinae	BOLD:AAP8616
Aphthona sp.	Pulau Mamutik	BOR/COL 09602	Galerucinae	BOLD:ADH3773
Argopistes sp. 1	Pulau Udar Kecil	BOR/COL 08442	Galerucinae	BOLD:ADH5650
Argopistes sp. 1	Pulau Udar Kecil	BOR/COL 08443	Galerucinae	BOLD:ADH5650
Argopistes sp. 1	Pulau Udar Kecil	BOR/COL 08444	Galerucinae	BOLD:ADH5650
Argopistes sp. 1	Pulau Udar Kecil	BOR/COL 08445	Galerucinae	BOLD:ADH5650
Argopistes sp. 1	Pulau Udar Kecil	BOR/COL 08446	Galerucinae	BOLD:ADH5650
Argopistes sp. 1	Pulau Gaya	BOR/COL 09813	Galerucinae	BOLD:ADH5650
Argopistes sp. 1	Pulau Udar Kecil	BOR/COL 09894	Galerucinae	BOLD:ADH5650
Argopistes sp. 1	Pulau Udar Kecil	BOR/COL 09895	Galerucinae	BOLD:ADH5650
Argopistes sp. 1	Pulau Gaya	BOR/COL 09915	Galerucinae	BOLD:ADH5650
Argopistes sp. 1	Pulau Gaya	BOR/COL 09916	Galerucinae	BOLD:ADH5650
Argopistes sp. 1	Pulau Gaya	BOR/COL 09917	Galerucinae	BOLD:ADH5650
Argopistes sp. 2	Pulau Mamutik	BOR/COL 09608	Galerucinae	BOLD:ADH5651
Argopistes sp. 2	Pulau Mamutik	BOR/COL 09609	Galerucinae	BOLD:ADH5651
Aulacia sp.	Pulau Tiga	BOR/COL 09154	Eumolpinae	N/A
Aulacia sp.	Pulau Tiga	BOR/COL 09200	Eumolpinae	N/A
Aulacophora sp.	Pulau Gaya	BOR/COL 08103	Galerucinae	BOLD:ADH4212
Aulacophora sp.	Pulau Gaya	BOR/COL 08184	Galerucinae	BOLD:ADH4212
Aulacophora sp.	Pulau Gaya	BOR/COL 08321	Galerucinae	BOLD:ADH4212
Aulacophora sp.	Pulau Gaya	BOR/COL 08331	Galerucinae	BOLD:ADH4212
Aulacophora sp.	Pulau Gaya	BOR/COL 09462	Galerucinae	BOLD:ADH4212
Aulacophora sp.	Pulau Gaya	BOR/COL 09463	Galerucinae	BOLD:ADH4212
Aulacophora sp.	Pulau Gaya	BOR/COL 09464	Galerucinae	BOLD:ADH4212
Basilepta sp. 1	Pulau Gaya	BOR/COL 08202	Eumolpinae	BOLD:ADH5567
Basilepta sp. 1	Pulau Gaya	BOR/COL 08237	Eumolpinae	BOLD:ADH5567
Basilepta sp. 1	Pulau Gaya	BOR/COL 09296	Eumolpinae	BOLD:ADH5567
Basilepta sp. 1	Pulau Gaya	BOR/COL 09302	Eumolpinae	BOLD:ADH5567
Basilepta sp. 1	Pulau Gaya	BOR/COL 09303	Eumolpinae	BOLD:ADH5567
Basilepta sp. 1	Pulau Gaya	BOR/COL 09304	Eumolpinae	BOLD:ADH5567
Basilepta sp. 1	Pulau Gaya	BOR/COL 09305	Eumolpinae	BOLD:ADH5567
Basilepta sp. 1	Pulau Gaya	BOR/COL 09306	Eumolpinae	BOLD:ADH5567
Basilepta sp. 1	Pulau Gaya	BOR/COL 09307	Eumolpinae	BOLD:ADH5567
Basilepta sp. 1	Pulau Gaya	BOR/COL 09308	Eumolpinae	BOLD:ADH5567
Basilepta sp. 1	Pulau Gaya	BOR/COL 09309	Eumolpinae	BOLD:ADH5567
Basilepta sp. 1	Pulau Gaya	BOR/COL 09310	Eumolpinae	BOLD:ADH5567
Basilepta sp. 1	Pulau Mantukod	BOR/COL 09737	Eumolpinae	BOLD:ADH5567
Basilepta sp. 1	Pulau Gaya	BOR/COL 09843	Eumolpinae	BOLD:ADH5567
Basilepta sp. 1	Pulau Gaya	BOR/COL 09844	Eumolpinae	BOLD:ADH5567
Basilepta sp. 1	Pulau Gaya	BOR/COL 09845	Eumolpinae	BOLD:ADH5567
Basilepta sp. 1	Pulau Gaya	BOR/COL 09846	Eumolpinae	BOLD:ADH5567
Basilepta sp. 1	Pulau Gaya	BOR/COL 09847	Eumolpinae	BOLD:ADH5567
Basilepta sp. 1	Pulau Gaya	BOR/COL 09848	Eumolpinae	BOLD:ADH5567
Basilepta sp. 1	Pulau Gaya	BOR/COL 09918	Eumolpinae	BOLD:ADH5567
Basilepta sp. 1	Pulau Gaya	BOR/COL 09919	Eumolpinae	BOLD:ADH5567
Basilepta sp. 2	Pulau Gaya	BOR/COL 06930	Eumolpinae	BOLD:ADH5568
Basilepta sp. 2	Pulau Gaya	BOR/COL 09311	Eumolpinae	BOLD:ADH5568
Basilepta sp. 2	Pulau Gaya	BOR/COL 09312	Eumolpinae	BOLD:ADH5568
Basilepta sp. 2	Pulau Gaya	BOR/COL 09313	Eumolpinae	BOLD:ADH5568
Basilepta sp. 2	Pulau Gaya	BOR/COL 09314	Eumolpinae	BOLD:ADH5568
Basilepta sp. 2	Pulau Gaya	BOR/COL 09315	Eumolpinae	BOLD:ADH5568
Basilepta sp. 2	Pulau Gaya	BOR/COL 09316	Eumolpinae	BOLD:ADH5568
Basilepta sp. 2	Pulau Sapangar	BOR/COL 09683	Eumolpinae	BOLD:ADH5568
Basilepta sp. 2	Pulau Gaya	BOR/COL 09819	Eumolpinae	BOLD:ADH5568
Basilepta sp. 3	Pulau Tiga	BOR/COL 09158	Eumolpinae	BOLD:ADI3390
Basilepta sp. 3	Pulau Tiga	BOR/COL 09170	Eumolpinae	BOLD:ADI3390
Basilepta sp. 3	Pulau Tiga	BOR/COL 09187	Eumolpinae	BOLD:ADI3390
Basilepta sp. 3	Pulau Sapangar	BOR/COL 09714	Eumolpinae	BOLD:ADI3390
Basilepta sp. 3	Pulau Tiga	BOR/COL 09757	Eumolpinae	BOLD:ADI3390
Basilepta sp. 3	Pulau Tiga	BOR/COL 09769	Eumolpinae	BOLD:ADI3390
Basilepta sp. 4	Pulau Tiga	BOR/COL 08064	Eumolpinae	BOLD:ADH4287
Basilepta sp. 4	Pulau Tiga	BOR/COL 08065	Eumolpinae	BOLD:ADH4287
Basilepta sp. 4	Pulau Tiga	BOR/COL 09758	Eumolpinae	BOLD:ADH4287
Basilepta sp. 4	Pulau Tiga	BOR/COL 09759	Eumolpinae	BOLD:ADH4287
Basilepta sp. 4	Pulau Tiga	BOR/COL 09760	Eumolpinae	BOLD:ADH4287
Basilepta sp. 4	Pulau Tiga	BOR/COL 09761	Eumolpinae	BOLD:ADH4287
Basilepta sp. 4	Pulau Tiga	BOR/COL 09762	Eumolpinae	BOLD:ADH4287
Basilepta sp. 4	Pulau Tiga	BOR/COL 09763	Eumolpinae	BOLD:ADH4287
Basilepta sp. 4	Pulau Tiga	BOR/COL 09764	Eumolpinae	BOLD:ADH4287
Basilepta sp. 4	Pulau Tiga	BOR/COL 09765	Eumolpinae	BOLD:ADH4287
Basilepta sp. 5	Pulau Gaya	BOR/COL 08102	Eumolpinae	N/A
Basilepta sp. 5	Pulau Gaya	BOR/COL 08198	Eumolpinae	N/A
Basilepta sp. 5	Pulau Gaya	BOR/COL 08324	Eumolpinae	N/A
Basilepta sp. 5	Pulau Gaya	BOR/COL 09331	Eumolpinae	N/A
Basilepta sp. 5	Pulau Gaya	BOR/COL 09420	Eumolpinae	N/A
Basilepta sp. 5	Pulau Sapangar	BOR/COL 09686	Eumolpinae	N/A
Basilepta sp. 5	Pulau Gaya	BOR/COL 09822	Eumolpinae	N/A
Basilepta sp. 5	Pulau Gaya	BOR/COL 09823	Eumolpinae	N/A
Basilepta sp. 5	Pulau Gaya	BOR/COL 09927	Eumolpinae	N/A
Basilepta sp. 5	Pulau Gaya	BOR/COL 09928	Eumolpinae	N/A
Basilepta sp. 5	Pulau Gaya	BOR/COL 09929	Eumolpinae	N/A
Basilepta sp. 5	Pulau Gaya	BOR/COL 09930	Eumolpinae	N/A
Basilepta sp. 5	Pulau Gaya	BOR/COL 09931	Eumolpinae	N/A
Basilepta sp. 6	Pulau Mengalum	BOR/COL 09977	Eumolpinae	N/A
Brontispa longissima	Pulau Tiga	BOR/COL 08054	Cassidinae	BOLD:AAL7691
Brontispa longissima	Pulau Tiga	BOR/COL 08055	Cassidinae	BOLD:AAL7691
Brontispa longissima	Pulau Tiga	BOR/COL 08056	Cassidinae	BOLD:AAL7691
Brontispa longissima	Pulau Tiga	BOR/COL 08057	Cassidinae	BOLD:AAL7691
Brontispa longissima	Pulau Tiga	BOR/COL 08058	Cassidinae	BOLD:AAL7691
Brontispa longissima	Pulau Tiga	BOR/COL 08059	Cassidinae	BOLD:AAL7691
Brontispa longissima	Pulau Tiga	BOR/COL 08060	Cassidinae	BOLD:AAL7691
Brontispa longissima	Pulau Tiga	BOR/COL 08061	Cassidinae	BOLD:AAL7691
Brontispa longissima	Pulau Tiga	BOR/COL 08062	Cassidinae	BOLD:AAL7691
Brontispa longissima	Pulau Manukan	BOR/COL 08397	Cassidinae	BOLD:AAL7691
Brontispa longissima	Pulau Dinawan	BOR/COL 08453	Cassidinae	BOLD:AAL7691
Brontispa longissima	Pulau Dinawan	BOR/COL 08454	Cassidinae	BOLD:AAL7691
Brontispa longissima	Pulau Dinawan	BOR/COL 08457	Cassidinae	BOLD:AAL7691
Brontispa longissima	Pulau Dinawan	BOR/COL 08486	Cassidinae	BOLD:AAL7691
Brontispa longissima	Pulau Dinawan	BOR/COL 08487	Cassidinae	BOLD:AAL7691
Brontispa longissima	Pulau Dinawan	BOR/COL 08488	Cassidinae	BOLD:AAL7691
Brontispa longissima	Pulau Dinawan	BOR/COL 08489	Cassidinae	BOLD:AAL7691
Brontispa longissima	Pulau Dinawan	BOR/COL 08490	Cassidinae	BOLD:AAL7691
Brontispa longissima	Pulau Dinawan	BOR/COL 08491	Cassidinae	BOLD:AAL7691
Brontispa longissima	Pulau Mengalum	BOR/COL 09244	Cassidinae	BOLD:AAL7691
Brontispa longissima	Pulau Mengalum	BOR/COL 09245	Cassidinae	BOLD:AAL7691
Brontispa longissima	Pulau Mengalum	BOR/COL 09246	Cassidinae	BOLD:AAL7691
Brontispa longissima	Pulau Mengalum	BOR/COL 09247	Cassidinae	BOLD:AAL7691
Brontispa longissima	Pulau Mengalum	BOR/COL 09248	Cassidinae	BOLD:AAL7691
Brontispa longissima	Pulau Manukan	BOR/COL 09586	Cassidinae	BOLD:AAL7691
Brontispa longissima	Pulau Manukan	BOR/COL 09587	Cassidinae	BOLD:AAL7691
Brontispa longissima	Pulau Manukan	BOR/COL 09588	Cassidinae	BOLD:AAL7691
Brontispa longissima	Pulau Manukan	BOR/COL 09589	Cassidinae	BOLD:AAL7691
Brontispa longissima	Pulau Mamutik	BOR/COL 09610	Cassidinae	BOLD:AAL7691
Brontispa longissima	Pulau Mamutik	BOR/COL 09611	Cassidinae	BOLD:AAL7691
Brontispa longissima	Pulau Mamutik	BOR/COL 09612	Cassidinae	BOLD:AAL7691
Brontispa longissima	Pulau Mamutik	BOR/COL 09613	Cassidinae	BOLD:AAL7691
Brontispa longissima	Pulau Mamutik	BOR/COL 09614	Cassidinae	BOLD:AAL7691
Brontispa longissima	Pulau Mamutik	BOR/COL 09615	Cassidinae	BOLD:AAL7691
Brontispa longissima	Pulau Mamutik	BOR/COL 09616	Cassidinae	BOLD:AAL7691
Brontispa longissima	Pulau Mamutik	BOR/COL 09617	Cassidinae	BOLD:AAL7691
Brontispa longissima	Pulau Mamutik	BOR/COL 09618	Cassidinae	BOLD:AAL7691
Brontispa longissima	Pulau Dinawan	BOR/COL 09751	Cassidinae	BOLD:AAL7691
Brontispa longissima	Pulau Dinawan	BOR/COL 09752	Cassidinae	BOLD:AAL7691
Cleorina malayana	Pulau Manukan	BOR/COL 09593	Eumolpinae	BOLD:ADH5352
Cleorina malayana	Pulau Manukan	BOR/COL 09594	Eumolpinae	BOLD:ADH5352
Cleorina malayana	Pulau Manukan	BOR/COL 09595	Eumolpinae	BOLD:ADH5352
Cleorina malayana	Pulau Manukan	BOR/COL 09596	Eumolpinae	BOLD:ADH5352
Cleorina malayana	Pulau Manukan	BOR/COL 09597	Eumolpinae	BOLD:ADH5352
Cleorina malayana	Pulau Manukan	BOR/COL 09598	Eumolpinae	BOLD:ADH5352
Cleorina malayana	Pulau Manukan	BOR/COL 09599	Eumolpinae	BOLD:ADH5352
Cleorina malayana	Pulau Sulug	BOR/COL 09637	Eumolpinae	BOLD:ADH5352
Clitena sp.	Pulau Manukan	BOR/COL 08399	Galerucinae	BOLD:ADH3702
Clitena sp.	Pulau Manukan	BOR/COL 09580	Galerucinae	BOLD:ADH3702
Colaspoides sp. 1	Pulau Tiga	BOR/COL 08545	Eumolpinae	BOLD:ADH4442
Colaspoides sp. 1	Pulau Tiga	BOR/COL 08546	Eumolpinae	BOLD:ADH4442
Colaspoides sp. 1	Pulau Gaya	BOR/COL 09398	Eumolpinae	BOLD:ADH4442
Colaspoides sp. 1	Pulau Gaya	BOR/COL 09454	Eumolpinae	BOLD:ADH4442
Colaspoides sp. 1	Pulau Gaya	BOR/COL 09455	Eumolpinae	BOLD:ADH4442
Colaspoides sp. 1	Pulau Gaya	BOR/COL 09456	Eumolpinae	BOLD:ADH4442
Colaspoides sp. 1	Pulau Gaya	BOR/COL 09457	Eumolpinae	BOLD:ADH4442
Colaspoides sp. 1	Pulau Gaya	BOR/COL 09458	Eumolpinae	BOLD:ADH4442
Colaspoides sp. 1	Pulau Sapangar	BOR/COL 09691	Eumolpinae	BOLD:ADH4442
Colaspoides tuberculata	Pulau Gaya	BOR/COL 09858	Eumolpinae	BOLD:ADH4443
Colasposoma auripenne	Pulau Dinawan	BOR/COL 09753	Eumolpinae	BOLD:ADH6210
Colasposoma auripenne	Pulau Dinawan	BOR/COL 09754	Eumolpinae	BOLD:ADH6210
Dactylispa sp. 1	Pulau Tiga	BOR/COL 09777	Cassidinae	BOLD:ADH5880
Dactylispa sp. 2	Pulau Gaya	BOR/COL 08305	Cassidinae	BOLD:ADH6349
Dercetina sp.	Pulau Gaya	BOR/COL 08150	Galerucinae	BOLD:ADH3896
Dercetina sp.	Pulau Sapangar	BOR/COL 08428	Galerucinae	BOLD:ADH3896
Dercetina sp.	Pulau Sapangar	BOR/COL 08434	Galerucinae	BOLD:ADH3896
Dercetina sp.	Pulau Sapangar	BOR/COL 09671	Galerucinae	BOLD:ADH3896
Dercetina sp.	Pulau Sapangar	BOR/COL 09713	Galerucinae	BOLD:ADH3896
Erystus villicus	Pulau Gaya	BOR/COL 08134	Galerucinae	BOLD:ADH6322
Erystus villicus	Pulau Gaya	BOR/COL 08135	Galerucinae	BOLD:ADH6322
Erystus villicus	Pulau Gaya	BOR/COL 08136	Galerucinae	BOLD:ADH6322
Erystus villicus	Pulau Gaya	BOR/COL 08137	Galerucinae	BOLD:ADH6322
Erystus villicus	Pulau Gaya	BOR/COL 08138	Galerucinae	BOLD:ADH6322
Erystus villicus	Pulau Gaya	BOR/COL 08139	Galerucinae	BOLD:ADH6322
Erystus villicus	Pulau Gaya	BOR/COL 08140	Galerucinae	BOLD:ADH6322
Erystus villicus	Pulau Gaya	BOR/COL 08141	Galerucinae	BOLD:ADH6322
Erystus villicus	Pulau Gaya	BOR/COL 08334	Galerucinae	BOLD:ADH6322
Erystus villicus	Pulau Gaya	BOR/COL 08335	Galerucinae	BOLD:ADH6322
Erystus villicus	Pulau Gaya	BOR/COL 08336	Galerucinae	BOLD:ADH6322
Erystus villicus	Pulau Gaya	BOR/COL 08337	Galerucinae	BOLD:ADH6322
Erystus villicus	Pulau Gaya	BOR/COL 08338	Galerucinae	BOLD:ADH6322
Erystus villicus	Pulau Gaya	BOR/COL 08339	Galerucinae	BOLD:ADH6322
Erystus villicus	Pulau Gaya	BOR/COL 08340	Galerucinae	BOLD:ADH6322
Erystus villicus	Pulau Gaya	BOR/COL 08341	Galerucinae	BOLD:ADH6322
Erystus villicus	Pulau Gaya	BOR/COL 09332	Galerucinae	BOLD:ADH6322
Erystus villicus	Pulau Gaya	BOR/COL 09333	Galerucinae	BOLD:ADH6322
Erystus villicus	Pulau Gaya	BOR/COL 09334	Galerucinae	BOLD:ADH6322
Erystus villicus	Pulau Gaya	BOR/COL 09394	Galerucinae	BOLD:ADH6322
Erystus villicus	Pulau Gaya	BOR/COL 09395	Galerucinae	BOLD:ADH6322
Erystus villicus	Pulau Gaya	BOR/COL 09400	Galerucinae	BOLD:ADH6322
Erystus villicus	Pulau Gaya	BOR/COL 09401	Galerucinae	BOLD:ADH6322
Erystus villicus	Pulau Gaya	BOR/COL 09402	Galerucinae	BOLD:ADH6322
Erystus villicus	Pulau Gaya	BOR/COL 09403	Galerucinae	BOLD:ADH6322
Erystus villicus	Pulau Gaya	BOR/COL 09404	Galerucinae	BOLD:ADH6322
Erystus villicus	Pulau Gaya	BOR/COL 09405	Galerucinae	BOLD:ADH6322
Erystus villicus	Pulau Gaya	BOR/COL 09406	Galerucinae	BOLD:ADH6322
Erystus villicus	Pulau Gaya	BOR/COL 09407	Galerucinae	BOLD:ADH6322
Erystus villicus	Pulau Gaya	BOR/COL 09408	Galerucinae	BOLD:ADH6322
Erystus villicus	Pulau Gaya	BOR/COL 09409	Galerucinae	BOLD:ADH6322
Erystus villicus	Pulau Gaya	BOR/COL 09410	Galerucinae	BOLD:ADH6322
Erystus villicus	Pulau Gaya	BOR/COL 09411	Galerucinae	BOLD:ADH6322
Erystus villicus	Pulau Gaya	BOR/COL 09412	Galerucinae	BOLD:ADH6322
Erystus villicus	Pulau Gaya	BOR/COL 09413	Galerucinae	BOLD:ADH6322
Erystus villicus	Pulau Gaya	BOR/COL 09415	Galerucinae	BOLD:ADH6322
Erystus villicus	Pulau Gaya	BOR/COL 09416	Galerucinae	BOLD:ADH6322
genus indet. nr. Monolepta	Pulau Gaya	BOR/COL 08277	Galerucinae	BOLD:ADH3996
genus indet. nr. Monolepta	Pulau Peduk	BOR/COL 09873	Galerucinae	BOLD:ADH3996
genus indet. nr. Monolepta	Pulau Peduk	BOR/COL 09874	Galerucinae	BOLD:ADH3996
genus indet. nr. Monolepta	Pulau Peduk	BOR/COL 09875	Galerucinae	BOLD:ADH3996
genus indet. nr. Monolepta	Pulau Peduk	BOR/COL 09876	Galerucinae	BOLD:ADH3996
genus indet. nr. Monolepta	Pulau Peduk	BOR/COL 09877	Galerucinae	BOLD:ADH3996
genus indet. nr. Monolepta	Pulau Peduk	BOR/COL 09884	Galerucinae	BOLD:ADH3996
genus indet. nr. Monolepta	Pulau Peduk	BOR/COL 09885	Galerucinae	BOLD:ADH3996
genus indet. nr. Monolepta	Pulau Peduk	BOR/COL 09888	Galerucinae	BOLD:ADH3996
genus indet. nr. Monolepta	Pulau Peduk	BOR/COL 09889	Galerucinae	BOLD:ADH3996
genus indet. nr. Monolepta	Pulau Peduk	BOR/COL 09890	Galerucinae	BOLD:ADH3996
genus indet. nr. Monolepta	Pulau Peduk	BOR/COL 09891	Galerucinae	BOLD:ADH3996
genus indet. nr. Monolepta	Pulau Peduk	BOR/COL 09892	Galerucinae	BOLD:ADH3996
genus indet. nr. Monolepta	Pulau Peduk	BOR/COL 09893	Galerucinae	BOLD:ADH3996
Gonophora sp.	Pulau Tiga	BOR/COL 08016	Cassidinae	BOLD:ADH6672
Gonophora sp.	Pulau Gaya	BOR/COL 08260	Cassidinae	BOLD:ADH6672
Gonophora sp.	Pulau Gaya	BOR/COL 08266	Cassidinae	BOLD:ADH6672
Gonophora sp.	Pulau Gaya	BOR/COL 08267	Cassidinae	BOLD:ADH6672
Gonophora sp.	Pulau Sapi	BOR/COL 08344	Cassidinae	BOLD:ADH6672
Gonophora sp.	Pulau Sapi	BOR/COL 08345	Cassidinae	BOLD:ADH6672
Gonophora sp.	Pulau Sapi	BOR/COL 08346	Cassidinae	BOLD:ADH6672
Gonophora sp.	Pulau Sapangar	BOR/COL 08423	Cassidinae	BOLD:ADH6672
Gonophora sp.	Pulau Sapangar	BOR/COL 08424	Cassidinae	BOLD:ADH6672
Gonophora sp.	Pulau Tiga	BOR/COL 08519	Cassidinae	BOLD:ADH6672
Gonophora sp.	Pulau Tiga	BOR/COL 08532	Cassidinae	BOLD:ADH6672
Gonophora sp.	Pulau Tiga	BOR/COL 08533	Cassidinae	BOLD:ADH6672
Gonophora sp.	Pulau Tiga	BOR/COL 09169	Cassidinae	BOLD:ADH6672
Gonophora sp.	Pulau Tiga	BOR/COL 09207	Cassidinae	BOLD:ADH6672
Gonophora sp.	Pulau Tiga	BOR/COL 09208	Cassidinae	BOLD:ADH6672
Gonophora sp.	Pulau Tiga	BOR/COL 09209	Cassidinae	BOLD:ADH6672
Gonophora sp.	Pulau Tiga	BOR/COL 09770	Cassidinae	BOLD:ADH6672
Gonophora sp.	Pulau Tiga	BOR/COL 09803	Cassidinae	BOLD:ADH6672
Gonophora sp.	Pulau Tiga	BOR/COL 09804	Cassidinae	BOLD:ADH6672
Gonophora sp.	Pulau Gaya	BOR/COL 09957	Cassidinae	BOLD:ADH6672
Gonophora sp.	Pulau Gaya	BOR/COL 09960	Cassidinae	BOLD:ADH6672
Hemipyxis sp.	Pulau Gaya	BOR/COL 08187	Galerucinae	N/A
Hemipyxis sp.	Pulau Gaya	BOR/COL 08213	Galerucinae	N/A
Hemipyxis sp.	Pulau Gaya	BOR/COL 08236	Galerucinae	N/A
Hemipyxis sp.	Pulau Gaya	BOR/COL 08325	Galerucinae	N/A
Hemipyxis sp.	Pulau Gaya	BOR/COL 08326	Galerucinae	N/A
Hemipyxis sp.	Pulau Gaya	BOR/COL 09397	Galerucinae	N/A
Hemipyxis sp.	Pulau Gaya	BOR/COL 09814	Galerucinae	N/A
Hemipyxis sp.	Pulau Gaya	BOR/COL 09815	Galerucinae	N/A
Hemipyxis sp.	Pulau Gaya	BOR/COL 09924	Galerucinae	N/A
Hemipyxis sp.	Pulau Gaya	BOR/COL 09961	Galerucinae	N/A
Hispinae sp.	Pulau Gaya	BOR/COL 09417	Cassidinae	N/A
Hoplosaenidea malayensis	Pulau Gaya	BOR/COL 08188	Galerucinae	BOLD:ADH4031
Hoplosaenidea malayensis	Pulau Gaya	BOR/COL 08189	Galerucinae	BOLD:ADH4031
Hoplosaenidea malayensis	Pulau Gaya	BOR/COL 08190	Galerucinae	BOLD:ADH4031
Hoplosaenidea malayensis	Pulau Gaya	BOR/COL 08191	Galerucinae	BOLD:ADH4031
Hoplosaenidea malayensis	Pulau Gaya	BOR/COL 08192	Galerucinae	BOLD:ADH4031
Hoplosaenidea malayensis	Pulau Gaya	BOR/COL 08193	Galerucinae	BOLD:ADH4031
Hoplosaenidea malayensis	Pulau Gaya	BOR/COL 08330	Galerucinae	BOLD:ADH4031
Hoplosaenidea malayensis	Pulau Sapangar	BOR/COL 08425	Galerucinae	BOLD:ADH4031
Hoplosaenidea malayensis	Pulau Udar Besar	BOR/COL 08440	Galerucinae	BOLD:ADH4031
Hoplosaenidea malayensis	Pulau Sapangar	BOR/COL 09680	Galerucinae	BOLD:ADH4031
Hoplosaenidea malayensis	Pulau Sapangar	BOR/COL 09681	Galerucinae	BOLD:ADH4031
Hoplosaenidea malayensis	Pulau Gaya	BOR/COL 09854	Galerucinae	BOLD:ADH4031
Hoplosaenidea malayensis	Pulau Gaya	BOR/COL 09855	Galerucinae	BOLD:ADH4031
Hoplosaenidea malayensis	Pulau Gaya	BOR/COL 09856	Galerucinae	BOLD:ADH4031
Hoplosaenidea sp. 1	Pulau Tiga	BOR/COL 07000	Galerucinae	BOLD:ADH3897
Hoplosaenidea sp. 2	Pulau Tiga	BOR/COL 08538	Galerucinae	BOLD:ADH4030
Hoplosaenidea sp. 2	Pulau Gaya	BOR/COL 09430	Galerucinae	BOLD:ADH4030
Hoplosaenidea sp. 2	Pulau Gaya	BOR/COL 09431	Galerucinae	BOLD:ADH4030
Hoplosaenidea sp. 2	Pulau Gaya	BOR/COL 09432	Galerucinae	BOLD:ADH4030
Hoplosaenidea sp. 2	Pulau Gaya	BOR/COL 09433	Galerucinae	BOLD:ADH4030
Hoplosaenidea sp. 2	Pulau Gaya	BOR/COL 09434	Galerucinae	BOLD:ADH4030
Hoplosaenidea sp. 3	Pulau Gaya	BOR/COL 08268	Galerucinae	N/A
Hoplosaenidea sp. 4	Pulau Gaya	BOR/COL 08095	Galerucinae	BOLD:ADH4029
Hoplosaenidea sp. 5	Pulau Mantukod	BOR/COL 09720	Galerucinae	BOLD:ADH4033
Hoplosaenidea sp. 5	Pulau Mantukod	BOR/COL 09721	Galerucinae	BOLD:ADH4033
Hoplosaenidea variabilis	Pulau Udar Besar	BOR/COL 09638	Galerucinae	BOLD:ADH4032
Hyphasis sp.	Pulau Dinawan	BOR/COL 08449	Galerucinae	BOLD:ADH5610
Lanka sp.	Pulau Gaya	BOR/COL 08097	Galerucinae	BOLD:ADH7255
Lema sp.	Pulau Gaya	BOR/COL 09393	Criocerinae	BOLD:ADH6230
Metrioidea grandis	Pulau Gaya	BOR/COL 08094	Galerucinae	BOLD:ADH7177
Metrioidea grandis	Pulau Gaya	BOR/COL 08106	Galerucinae	BOLD:ADH7177
Metrioidea grandis	Pulau Gaya	BOR/COL 08107	Galerucinae	BOLD:ADH7177
Metrioidea grandis	Pulau Gaya	BOR/COL 08108	Galerucinae	BOLD:ADH7177
Metrioidea grandis	Pulau Gaya	BOR/COL 08121	Galerucinae	BOLD:ADH7177
Metrioidea grandis	Pulau Gaya	BOR/COL 08122	Galerucinae	BOLD:ADH7177
Metrioidea grandis	Pulau Gaya	BOR/COL 08131	Galerucinae	BOLD:ADH7177
Metrioidea grandis	Pulau Gaya	BOR/COL 08132	Galerucinae	BOLD:ADH7177
Metrioidea grandis	Pulau Gaya	BOR/COL 08171	Galerucinae	BOLD:ADH7177
Metrioidea grandis	Pulau Gaya	BOR/COL 08172	Galerucinae	BOLD:ADH7177
Metrioidea grandis	Pulau Gaya	BOR/COL 08238	Galerucinae	BOLD:ADH7177
Metrioidea grandis	Pulau Gaya	BOR/COL 08241	Galerucinae	BOLD:ADH7177
Metrioidea grandis	Pulau Gaya	BOR/COL 08242	Galerucinae	BOLD:ADH7177
Metrioidea grandis	Pulau Gaya	BOR/COL 08243	Galerucinae	BOLD:ADH7177
Metrioidea grandis	Pulau Gaya	BOR/COL 08244	Galerucinae	BOLD:ADH7177
Metrioidea grandis	Pulau Gaya	BOR/COL 08245	Galerucinae	BOLD:ADH7177
Metrioidea grandis	Pulau Gaya	BOR/COL 08270	Galerucinae	BOLD:ADH7177
Metrioidea grandis	Pulau Gaya	BOR/COL 08271	Galerucinae	BOLD:ADH7177
Metrioidea grandis	Pulau Gaya	BOR/COL 08272	Galerucinae	BOLD:ADH7177
Metrioidea grandis	Pulau Gaya	BOR/COL 08273	Galerucinae	BOLD:ADH7177
Metrioidea grandis	Pulau Gaya	BOR/COL 08283	Galerucinae	BOLD:ADH7177
Metrioidea grandis	Pulau Gaya	BOR/COL 08284	Galerucinae	BOLD:ADH7177
Metrioidea grandis	Pulau Gaya	BOR/COL 08285	Galerucinae	BOLD:ADH7177
Metrioidea grandis	Pulau Gaya	BOR/COL 08286	Galerucinae	BOLD:ADH7177
Metrioidea grandis	Pulau Gaya	BOR/COL 08287	Galerucinae	BOLD:ADH7177
Metrioidea grandis	Pulau Gaya	BOR/COL 08288	Galerucinae	BOLD:ADH7177
Metrioidea grandis	Pulau Gaya	BOR/COL 08289	Galerucinae	BOLD:ADH7177
Metrioidea grandis	Pulau Gaya	BOR/COL 08290	Galerucinae	BOLD:ADH7177
Metrioidea grandis	Pulau Gaya	BOR/COL 08291	Galerucinae	BOLD:ADH7177
Metrioidea grandis	Pulau Gaya	BOR/COL 08292	Galerucinae	BOLD:ADH7177
Metrioidea grandis	Pulau Gaya	BOR/COL 08293	Galerucinae	BOLD:ADH7177
Metrioidea grandis	Pulau Gaya	BOR/COL 08294	Galerucinae	BOLD:ADH7177
Metrioidea grandis	Pulau Gaya	BOR/COL 08295	Galerucinae	BOLD:ADH7177
Metrioidea grandis	Pulau Gaya	BOR/COL 08296	Galerucinae	BOLD:ADH7177
Metrioidea grandis	Pulau Gaya	BOR/COL 08297	Galerucinae	BOLD:ADH7177
Metrioidea grandis	Pulau Gaya	BOR/COL 08298	Galerucinae	BOLD:ADH7177
Metrioidea grandis	Pulau Gaya	BOR/COL 08299	Galerucinae	BOLD:ADH7177
Metrioidea grandis	Pulau Gaya	BOR/COL 08300	Galerucinae	BOLD:ADH7177
Metrioidea grandis	Pulau Gaya	BOR/COL 08301	Galerucinae	BOLD:ADH7177
Metrioidea grandis	Pulau Gaya	BOR/COL 08302	Galerucinae	BOLD:ADH7177
Metrioidea grandis	Pulau Gaya	BOR/COL 08303	Galerucinae	BOLD:ADH7177
Metrioidea grandis	Pulau Gaya	BOR/COL 08304	Galerucinae	BOLD:ADH7177
Metrioidea grandis	Pulau Gaya	BOR/COL 08310	Galerucinae	BOLD:ADH7177
Metrioidea grandis	Pulau Sapangar	BOR/COL 08417	Galerucinae	BOLD:ADH7177
Metrioidea grandis	Pulau Sapangar	BOR/COL 08429	Galerucinae	BOLD:ADH7177
Metrioidea grandis	Pulau Sapangar	BOR/COL 08430	Galerucinae	BOLD:ADH7177
Metrioidea grandis	Pulau Sapangar	BOR/COL 08431	Galerucinae	BOLD:ADH7177
Metrioidea grandis	Pulau Sapangar	BOR/COL 08432	Galerucinae	BOLD:ADH7177
Metrioidea grandis	Pulau Sapangar	BOR/COL 08433	Galerucinae	BOLD:ADH7177
Metrioidea grandis	Pulau Gaya	BOR/COL 09428	Galerucinae	BOLD:ADH7177
Metrioidea grandis	Pulau Gaya	BOR/COL 09465	Galerucinae	BOLD:ADH7177
Metrioidea grandis	Pulau Gaya	BOR/COL 09466	Galerucinae	BOLD:ADH7177
Metrioidea grandis	Pulau Gaya	BOR/COL 09467	Galerucinae	BOLD:ADH7177
Metrioidea grandis	Pulau Gaya	BOR/COL 09480	Galerucinae	BOLD:ADH7177
Metrioidea grandis	Pulau Gaya	BOR/COL 09494	Galerucinae	BOLD:ADH7177
Monolepta sp. 1	Pulau Gaya	BOR/COL 08209	Galerucinae	BOLD:ADH4138
Monolepta sp. 1	Pulau Gaya	BOR/COL 08210	Galerucinae	BOLD:ADH4138
Monolepta sp. 1	Pulau Gaya	BOR/COL 08211	Galerucinae	BOLD:ADH4138
Monolepta sp. 1	Pulau Gaya	BOR/COL 08235	Galerucinae	BOLD:ADH4138
Monolepta sp. 1	Pulau Gaya	BOR/COL 08250	Galerucinae	BOLD:ADH4138
Monolepta sp. 1	Pulau Gaya	BOR/COL 08323	Galerucinae	BOLD:ADH4138
Monolepta sp. 1	Pulau Gaya	BOR/COL 08332	Galerucinae	BOLD:ADH4138
Monolepta sp. 1	Pulau Sapangar	BOR/COL 08427	Galerucinae	BOLD:ADH4138
Monolepta sp. 1	Pulau Sapangar	BOR/COL 08435	Galerucinae	BOLD:ADH4138
Monolepta sp. 1	Pulau Sapangar	BOR/COL 08436	Galerucinae	BOLD:ADH4138
Monolepta sp. 1	Pulau Udar Besar	BOR/COL 08441	Galerucinae	BOLD:ADH4138
Monolepta sp. 1	Pulau Sapi	BOR/COL 09215	Galerucinae	BOLD:ADH4138
Monolepta sp. 1	Pulau Sapi	BOR/COL 09216	Galerucinae	BOLD:ADH4138
Monolepta sp. 1	Pulau Sapi	BOR/COL 09217	Galerucinae	BOLD:ADH4138
Monolepta sp. 1	Pulau Sapi	BOR/COL 09218	Galerucinae	BOLD:ADH4138
Monolepta sp. 1	Pulau Sapi	BOR/COL 09219	Galerucinae	BOLD:ADH4138
Monolepta sp. 1	Pulau Sapi	BOR/COL 09220	Galerucinae	BOLD:ADH4138
Monolepta sp. 1	Pulau Sapi	BOR/COL 09243	Galerucinae	BOLD:ADH4138
Monolepta sp. 1	Pulau Gaya	BOR/COL 09396	Galerucinae	BOLD:ADH4138
Monolepta sp. 1	Pulau Gaya	BOR/COL 09460	Galerucinae	BOLD:ADH4138
Monolepta sp. 1	Pulau Sulug	BOR/COL 09619	Galerucinae	BOLD:ADH4138
Monolepta sp. 1	Pulau Sulug	BOR/COL 09620	Galerucinae	BOLD:ADH4138
Monolepta sp. 1	Pulau Sulug	BOR/COL 09621	Galerucinae	BOLD:ADH4138
Monolepta sp. 1	Pulau Sulug	BOR/COL 09622	Galerucinae	BOLD:ADH4138
Monolepta sp. 1	Pulau Sulug	BOR/COL 09624	Galerucinae	BOLD:ADH4138
Monolepta sp. 1	Pulau Sulug	BOR/COL 09625	Galerucinae	BOLD:ADH4138
Monolepta sp. 1	Pulau Sulug	BOR/COL 09626	Galerucinae	BOLD:ADH4138
Monolepta sp. 1	Pulau Sulug	BOR/COL 09627	Galerucinae	BOLD:ADH4138
Monolepta sp. 1	Pulau Sulug	BOR/COL 09628	Galerucinae	BOLD:ADH4138
Monolepta sp. 1	Pulau Sulug	BOR/COL 09629	Galerucinae	BOLD:ADH4138
Monolepta sp. 1	Pulau Sulug	BOR/COL 09630	Galerucinae	BOLD:ADH4138
Monolepta sp. 1	Pulau Sulug	BOR/COL 09631	Galerucinae	BOLD:ADH4138
Monolepta sp. 1	Pulau Sulug	BOR/COL 09632	Galerucinae	BOLD:ADH4138
Monolepta sp. 1	Pulau Sulug	BOR/COL 09633	Galerucinae	BOLD:ADH4138
Monolepta sp. 1	Pulau Sulug	BOR/COL 09635	Galerucinae	BOLD:ADH4138
Monolepta sp. 1	Pulau Sulug	BOR/COL 09636	Galerucinae	BOLD:ADH4138
Monolepta sp. 1	Pulau Sapangar	BOR/COL 09672	Galerucinae	BOLD:ADH4138
Monolepta sp. 1	Pulau Sapangar	BOR/COL 09674	Galerucinae	BOLD:ADH4138
Monolepta sp. 1	Pulau Sapangar	BOR/COL 09690	Galerucinae	BOLD:ADH4138
Monolepta sp. 1	Pulau Sapangar	BOR/COL 09699	Galerucinae	BOLD:ADH4138
Monolepta sp. 1	Pulau Sapangar	BOR/COL 09709	Galerucinae	BOLD:ADH4138
Monolepta sp. 1	Pulau Sapangar	BOR/COL 09710	Galerucinae	BOLD:ADH4138
Monolepta sp. 1	Pulau Sapangar	BOR/COL 09711	Galerucinae	BOLD:ADH4138
Monolepta sp. 1	Pulau Mantukod	BOR/COL 09736	Galerucinae	BOLD:ADH4138
Monolepta sp. 1	Pulau Gaya	BOR/COL 09805	Galerucinae	BOLD:ADH4138
Monolepta sp. 1	Pulau Gaya	BOR/COL 09836	Galerucinae	BOLD:ADH4138
Monolepta sp. 1	Pulau Gaya	BOR/COL 09837	Galerucinae	BOLD:ADH4138
Monolepta sp. 1	Pulau Gaya	BOR/COL 09838	Galerucinae	BOLD:ADH4138
Monolepta sp. 1	Pulau Gaya	BOR/COL 09839	Galerucinae	BOLD:ADH4138
Monolepta sp. 1	Pulau Gaya	BOR/COL 09840	Galerucinae	BOLD:ADH4138
Monolepta sp. 1	Pulau Udar Kecil	BOR/COL 09899	Galerucinae	BOLD:ADH4138
Monolepta sp. 1	Pulau Udar Kecil	BOR/COL 09900	Galerucinae	BOLD:ADH4138
Monolepta sp. 1	Pulau Gaya	BOR/COL 09932	Galerucinae	BOLD:ADH4138
Monolepta sp. 10	Pulau Gaya	BOR/COL 08104	Galerucinae	BOLD:ADH7148
Monolepta sp. 10	Pulau Gaya	BOR/COL 08181	Galerucinae	BOLD:ADH7148
Monolepta sp. 10	Pulau Mantukod	BOR/COL 09732	Galerucinae	BOLD:ADH7148
Monolepta sp. 11	Pulau Gaya	BOR/COL 08119	Galerucinae	BOLD:ADH7140
Monolepta sp. 12	Pulau Tiga	BOR/COL 09201	Galerucinae	BOLD:ADH4195
Monolepta sp. 13	Pulau Sapangar	BOR/COL 09678	Galerucinae	N/A
Monolepta sp. 14	Pulau Sapi	BOR/COL 09223	Galerucinae	BOLD:ADH4966
Monolepta sp. 14	Pulau Sapi	BOR/COL 09240	Galerucinae	BOLD:ADH4966
Monolepta sp. 14	Pulau Gaya	BOR/COL 09418	Galerucinae	BOLD:ADH4966
Monolepta sp. 14	Pulau Gaya	BOR/COL 09419	Galerucinae	BOLD:ADH4966
Monolepta sp. 14	Pulau Gaya	BOR/COL 09450	Galerucinae	BOLD:ADH4966
Monolepta sp. 14	Pulau Manukan	BOR/COL 09556	Galerucinae	BOLD:ADH4966
Monolepta sp. 14	Pulau Manukan	BOR/COL 09557	Galerucinae	BOLD:ADH4966
Monolepta sp. 14	Pulau Tiga	BOR/COL 09766	Galerucinae	BOLD:ADH4966
Monolepta sp. 14	Pulau Gaya	BOR/COL 09842	Galerucinae	BOLD:ADH4966
Monolepta sp. 15	Pulau Dinawan	BOR/COL 08456	Galerucinae	BOLD:ADH4198
Monolepta sp. 15	Pulau Gaya	BOR/COL 09438	Galerucinae	BOLD:ADH4198
Monolepta sp. 15	Pulau Gaya	BOR/COL 09439	Galerucinae	BOLD:ADH4198
Monolepta sp. 15	Pulau Mamutik	BOR/COL 09600	Galerucinae	BOLD:ADH4198
Monolepta sp. 15	Pulau Udar Besar	BOR/COL 09639	Galerucinae	BOLD:ADH4198
Monolepta sp. 15	Pulau Udar Besar	BOR/COL 09670	Galerucinae	BOLD:ADH4198
Monolepta sp. 15	Pulau Peduk	BOR/COL 09883	Galerucinae	BOLD:ADH4198
Monolepta sp. 16	Pulau Gaya	BOR/COL 09424	Galerucinae	N/A
Monolepta sp. 16	Pulau Gaya	BOR/COL 09445	Galerucinae	N/A
Monolepta sp. 16	Pulau Gaya	BOR/COL 09958	Galerucinae	N/A
Monolepta sp. 17	Pulau Gaya	BOR/COL 09449	Galerucinae	BOLD:ADH7141
Monolepta sp. 18	Pulau Sapangar	BOR/COL 09679	Galerucinae	BOLD:ADH4197
Monolepta sp. 2	Pulau Gaya	BOR/COL 06931	Galerucinae	BOLD:ADH7139
Monolepta sp. 2	Pulau Tiga	BOR/COL 08526	Galerucinae	BOLD:ADH7139
Monolepta sp. 2	Pulau Gaya	BOR/COL 09442	Galerucinae	BOLD:ADH7139
Monolepta sp. 2	Pulau Tiga	BOR/COL 09774	Galerucinae	BOLD:ADH7139
Monolepta sp. 3	Pulau Gaya	BOR/COL 06924	Galerucinae	BOLD:ADH4196
Monolepta sp. 3	Pulau Gaya	BOR/COL 06925	Galerucinae	BOLD:ADH4196
Monolepta sp. 3	Pulau Gaya	BOR/COL 06926	Galerucinae	BOLD:ADH4196
Monolepta sp. 3	Pulau Gaya	BOR/COL 09423	Galerucinae	BOLD:ADH4196
Monolepta sp. 3	Pulau Gaya	BOR/COL 09468	Galerucinae	BOLD:ADH4196
Monolepta sp. 3	Pulau Gaya	BOR/COL 09469	Galerucinae	BOLD:ADH4196
Monolepta sp. 3	Pulau Gaya	BOR/COL 09470	Galerucinae	BOLD:ADH4196
Monolepta sp. 3	Pulau Tiga	BOR/COL 09778	Galerucinae	BOLD:ADH4196
Monolepta sp. 4	Pulau Gaya	BOR/COL 06921	Galerucinae	BOLD:ADH6840
Monolepta sp. 4	Pulau Gaya	BOR/COL 06922	Galerucinae	BOLD:ADH6840
Monolepta sp. 4	Pulau Gaya	BOR/COL 06923	Galerucinae	BOLD:ADH6840
Monolepta sp. 4	Pulau Dinawan	BOR/COL 08455	Galerucinae	BOLD:ADH6840
Monolepta sp. 4	Pulau Dinawan	BOR/COL 08492	Galerucinae	BOLD:ADH6840
Monolepta sp. 4	Pulau Dinawan	BOR/COL 08493	Galerucinae	BOLD:ADH6840
Monolepta sp. 4	Pulau Dinawan	BOR/COL 08494	Galerucinae	BOLD:ADH6840
Monolepta sp. 4	Pulau Dinawan	BOR/COL 08495	Galerucinae	BOLD:ADH6840
Monolepta sp. 4	Pulau Dinawan	BOR/COL 08496	Galerucinae	BOLD:ADH6840
Monolepta sp. 4	Pulau Dinawan	BOR/COL 08497	Galerucinae	BOLD:ADH6840
Monolepta sp. 4	Pulau Dinawan	BOR/COL 08498	Galerucinae	BOLD:ADH6840
Monolepta sp. 4	Pulau Dinawan	BOR/COL 08499	Galerucinae	BOLD:ADH6840
Monolepta sp. 4	Pulau Dinawan	BOR/COL 08500	Galerucinae	BOLD:ADH6840
Monolepta sp. 4	Pulau Dinawan	BOR/COL 08501	Galerucinae	BOLD:ADH6840
Monolepta sp. 4	Pulau Dinawan	BOR/COL 08502	Galerucinae	BOLD:ADH6840
Monolepta sp. 4	Pulau Dinawan	BOR/COL 08503	Galerucinae	BOLD:ADH6840
Monolepta sp. 4	Pulau Dinawan	BOR/COL 08504	Galerucinae	BOLD:ADH6840
Monolepta sp. 4	Pulau Dinawan	BOR/COL 08505	Galerucinae	BOLD:ADH6840
Monolepta sp. 4	Pulau Mengalum	BOR/COL 09249	Galerucinae	BOLD:ADH6840
Monolepta sp. 4	Pulau Gaya	BOR/COL 09335	Galerucinae	BOLD:ADH6840
Monolepta sp. 4	Pulau Gaya	BOR/COL 09336	Galerucinae	BOLD:ADH6840
Monolepta sp. 4	Pulau Gaya	BOR/COL 09337	Galerucinae	BOLD:ADH6840
Monolepta sp. 4	Pulau Gaya	BOR/COL 09338	Galerucinae	BOLD:ADH6840
Monolepta sp. 4	Pulau Gaya	BOR/COL 09339	Galerucinae	BOLD:ADH6840
Monolepta sp. 4	Pulau Gaya	BOR/COL 09340	Galerucinae	BOLD:ADH6840
Monolepta sp. 4	Pulau Gaya	BOR/COL 09341	Galerucinae	BOLD:ADH6840
Monolepta sp. 4	Pulau Gaya	BOR/COL 09342	Galerucinae	BOLD:ADH6840
Monolepta sp. 4	Pulau Gaya	BOR/COL 09343	Galerucinae	BOLD:ADH6840
Monolepta sp. 4	Pulau Gaya	BOR/COL 09344	Galerucinae	BOLD:ADH6840
Monolepta sp. 4	Pulau Gaya	BOR/COL 09345	Galerucinae	BOLD:ADH6840
Monolepta sp. 4	Pulau Gaya	BOR/COL 09346	Galerucinae	BOLD:ADH6840
Monolepta sp. 4	Pulau Gaya	BOR/COL 09347	Galerucinae	BOLD:ADH6840
Monolepta sp. 4	Pulau Gaya	BOR/COL 09348	Galerucinae	BOLD:ADH6840
Monolepta sp. 4	Pulau Gaya	BOR/COL 09349	Galerucinae	BOLD:ADH6840
Monolepta sp. 4	Pulau Gaya	BOR/COL 09350	Galerucinae	BOLD:ADH6840
Monolepta sp. 4	Pulau Gaya	BOR/COL 09351	Galerucinae	BOLD:ADH6840
Monolepta sp. 4	Pulau Gaya	BOR/COL 09352	Galerucinae	BOLD:ADH6840
Monolepta sp. 4	Pulau Gaya	BOR/COL 09353	Galerucinae	BOLD:ADH6840
Monolepta sp. 4	Pulau Gaya	BOR/COL 09354	Galerucinae	BOLD:ADH6840
Monolepta sp. 4	Pulau Gaya	BOR/COL 09355	Galerucinae	BOLD:ADH6840
Monolepta sp. 4	Pulau Gaya	BOR/COL 09356	Galerucinae	BOLD:ADH6840
Monolepta sp. 4	Pulau Gaya	BOR/COL 09357	Galerucinae	BOLD:ADH6840
Monolepta sp. 4	Pulau Gaya	BOR/COL 09358	Galerucinae	BOLD:ADH6840
Monolepta sp. 4	Pulau Gaya	BOR/COL 09359	Galerucinae	BOLD:ADH6840
Monolepta sp. 4	Pulau Gaya	BOR/COL 09360	Galerucinae	BOLD:ADH6840
Monolepta sp. 4	Pulau Gaya	BOR/COL 09361	Galerucinae	BOLD:ADH6840
Monolepta sp. 4	Pulau Gaya	BOR/COL 09362	Galerucinae	BOLD:ADH6840
Monolepta sp. 4	Pulau Gaya	BOR/COL 09363	Galerucinae	BOLD:ADH6840
Monolepta sp. 4	Pulau Gaya	BOR/COL 09364	Galerucinae	BOLD:ADH6840
Monolepta sp. 4	Pulau Gaya	BOR/COL 09365	Galerucinae	BOLD:ADH6840
Monolepta sp. 4	Pulau Gaya	BOR/COL 09366	Galerucinae	BOLD:ADH6840
Monolepta sp. 4	Pulau Gaya	BOR/COL 09367	Galerucinae	BOLD:ADH6840
Monolepta sp. 4	Pulau Gaya	BOR/COL 09368	Galerucinae	BOLD:ADH6840
Monolepta sp. 4	Pulau Gaya	BOR/COL 09369	Galerucinae	BOLD:ADH6840
Monolepta sp. 4	Pulau Gaya	BOR/COL 09370	Galerucinae	BOLD:ADH6840
Monolepta sp. 4	Pulau Gaya	BOR/COL 09371	Galerucinae	BOLD:ADH6840
Monolepta sp. 4	Pulau Gaya	BOR/COL 09372	Galerucinae	BOLD:ADH6840
Monolepta sp. 4	Pulau Gaya	BOR/COL 09373	Galerucinae	BOLD:ADH6840
Monolepta sp. 4	Pulau Gaya	BOR/COL 09374	Galerucinae	BOLD:ADH6840
Monolepta sp. 4	Pulau Gaya	BOR/COL 09375	Galerucinae	BOLD:ADH6840
Monolepta sp. 4	Pulau Gaya	BOR/COL 09376	Galerucinae	BOLD:ADH6840
Monolepta sp. 4	Pulau Gaya	BOR/COL 09377	Galerucinae	BOLD:ADH6840
Monolepta sp. 4	Pulau Gaya	BOR/COL 09378	Galerucinae	BOLD:ADH6840
Monolepta sp. 4	Pulau Gaya	BOR/COL 09379	Galerucinae	BOLD:ADH6840
Monolepta sp. 4	Pulau Gaya	BOR/COL 09380	Galerucinae	BOLD:ADH6840
Monolepta sp. 4	Pulau Gaya	BOR/COL 09381	Galerucinae	BOLD:ADH6840
Monolepta sp. 4	Pulau Gaya	BOR/COL 09382	Galerucinae	BOLD:ADH6840
Monolepta sp. 4	Pulau Gaya	BOR/COL 09383	Galerucinae	BOLD:ADH6840
Monolepta sp. 4	Pulau Gaya	BOR/COL 09384	Galerucinae	BOLD:ADH6840
Monolepta sp. 4	Pulau Gaya	BOR/COL 09385	Galerucinae	BOLD:ADH6840
Monolepta sp. 4	Pulau Gaya	BOR/COL 09386	Galerucinae	BOLD:ADH6840
Monolepta sp. 4	Pulau Gaya	BOR/COL 09387	Galerucinae	BOLD:ADH6840
Monolepta sp. 4	Pulau Gaya	BOR/COL 09388	Galerucinae	BOLD:ADH6840
Monolepta sp. 4	Pulau Gaya	BOR/COL 09389	Galerucinae	BOLD:ADH6840
Monolepta sp. 4	Pulau Gaya	BOR/COL 09390	Galerucinae	BOLD:ADH6840
Monolepta sp. 4	Pulau Gaya	BOR/COL 09391	Galerucinae	BOLD:ADH6840
Monolepta sp. 4	Pulau Gaya	BOR/COL 09392	Galerucinae	BOLD:ADH6840
Monolepta sp. 4	Pulau Gaya	BOR/COL 09471	Galerucinae	BOLD:ADH6840
Monolepta sp. 4	Pulau Gaya	BOR/COL 09472	Galerucinae	BOLD:ADH6840
Monolepta sp. 4	Pulau Gaya	BOR/COL 09473	Galerucinae	BOLD:ADH6840
Monolepta sp. 4	Pulau Gaya	BOR/COL 09474	Galerucinae	BOLD:ADH6840
Monolepta sp. 4	Pulau Gaya	BOR/COL 09475	Galerucinae	BOLD:ADH6840
Monolepta sp. 4	Pulau Gaya	BOR/COL 09476	Galerucinae	BOLD:ADH6840
Monolepta sp. 4	Pulau Gaya	BOR/COL 09477	Galerucinae	BOLD:ADH6840
Monolepta sp. 4	Pulau Gaya	BOR/COL 09478	Galerucinae	BOLD:ADH6840
Monolepta sp. 4	Pulau Manukan	BOR/COL 09558	Galerucinae	BOLD:ADH6840
Monolepta sp. 4	Pulau Manukan	BOR/COL 09559	Galerucinae	BOLD:ADH6840
Monolepta sp. 4	Pulau Manukan	BOR/COL 09560	Galerucinae	BOLD:ADH6840
Monolepta sp. 4	Pulau Manukan	BOR/COL 09561	Galerucinae	BOLD:ADH6840
Monolepta sp. 4	Pulau Manukan	BOR/COL 09562	Galerucinae	BOLD:ADH6840
Monolepta sp. 4	Pulau Manukan	BOR/COL 09563	Galerucinae	BOLD:ADH6840
Monolepta sp. 4	Pulau Manukan	BOR/COL 09564	Galerucinae	BOLD:ADH6840
Monolepta sp. 4	Pulau Manukan	BOR/COL 09565	Galerucinae	BOLD:ADH6840
Monolepta sp. 4	Pulau Manukan	BOR/COL 09566	Galerucinae	BOLD:ADH6840
Monolepta sp. 4	Pulau Manukan	BOR/COL 09567	Galerucinae	BOLD:ADH6840
Monolepta sp. 4	Pulau Manukan	BOR/COL 09568	Galerucinae	BOLD:ADH6840
Monolepta sp. 4	Pulau Manukan	BOR/COL 09569	Galerucinae	BOLD:ADH6840
Monolepta sp. 4	Pulau Manukan	BOR/COL 09570	Galerucinae	BOLD:ADH6840
Monolepta sp. 4	Pulau Manukan	BOR/COL 09571	Galerucinae	BOLD:ADH6840
Monolepta sp. 4	Pulau Manukan	BOR/COL 09572	Galerucinae	BOLD:ADH6840
Monolepta sp. 4	Pulau Manukan	BOR/COL 09573	Galerucinae	BOLD:ADH6840
Monolepta sp. 4	Pulau Manukan	BOR/COL 09574	Galerucinae	BOLD:ADH6840
Monolepta sp. 4	Pulau Manukan	BOR/COL 09575	Galerucinae	BOLD:ADH6840
Monolepta sp. 4	Pulau Manukan	BOR/COL 09576	Galerucinae	BOLD:ADH6840
Monolepta sp. 4	Pulau Manukan	BOR/COL 09577	Galerucinae	BOLD:ADH6840
Monolepta sp. 4	Pulau Manukan	BOR/COL 09578	Galerucinae	BOLD:ADH6840
Monolepta sp. 4	Pulau Manukan	BOR/COL 09579	Galerucinae	BOLD:ADH6840
Monolepta sp. 4	Pulau Udar Besar	BOR/COL 09640	Galerucinae	BOLD:ADH6840
Monolepta sp. 4	Pulau Udar Besar	BOR/COL 09641	Galerucinae	BOLD:ADH6840
Monolepta sp. 4	Pulau Udar Besar	BOR/COL 09642	Galerucinae	BOLD:ADH6840
Monolepta sp. 4	Pulau Udar Besar	BOR/COL 09643	Galerucinae	BOLD:ADH6840
Monolepta sp. 4	Pulau Udar Besar	BOR/COL 09644	Galerucinae	BOLD:ADH6840
Monolepta sp. 4	Pulau Udar Besar	BOR/COL 09645	Galerucinae	BOLD:ADH6840
Monolepta sp. 4	Pulau Udar Besar	BOR/COL 09646	Galerucinae	BOLD:ADH6840
Monolepta sp. 4	Pulau Udar Besar	BOR/COL 09647	Galerucinae	BOLD:ADH6840
Monolepta sp. 4	Pulau Udar Besar	BOR/COL 09648	Galerucinae	BOLD:ADH6840
Monolepta sp. 4	Pulau Udar Besar	BOR/COL 09649	Galerucinae	BOLD:ADH6840
Monolepta sp. 4	Pulau Udar Besar	BOR/COL 09650	Galerucinae	BOLD:ADH6840
Monolepta sp. 4	Pulau Udar Besar	BOR/COL 09651	Galerucinae	BOLD:ADH6840
Monolepta sp. 4	Pulau Udar Besar	BOR/COL 09652	Galerucinae	BOLD:ADH6840
Monolepta sp. 4	Pulau Udar Besar	BOR/COL 09653	Galerucinae	BOLD:ADH6840
Monolepta sp. 4	Pulau Udar Besar	BOR/COL 09654	Galerucinae	BOLD:ADH6840
Monolepta sp. 4	Pulau Udar Besar	BOR/COL 09655	Galerucinae	BOLD:ADH6840
Monolepta sp. 4	Pulau Udar Besar	BOR/COL 09656	Galerucinae	BOLD:ADH6840
Monolepta sp. 4	Pulau Udar Besar	BOR/COL 09657	Galerucinae	BOLD:ADH6840
Monolepta sp. 4	Pulau Udar Besar	BOR/COL 09658	Galerucinae	BOLD:ADH6840
Monolepta sp. 4	Pulau Udar Besar	BOR/COL 09659	Galerucinae	BOLD:ADH6840
Monolepta sp. 4	Pulau Udar Besar	BOR/COL 09660	Galerucinae	BOLD:ADH6840
Monolepta sp. 4	Pulau Udar Besar	BOR/COL 09661	Galerucinae	BOLD:ADH6840
Monolepta sp. 4	Pulau Udar Besar	BOR/COL 09662	Galerucinae	BOLD:ADH6840
Monolepta sp. 4	Pulau Udar Besar	BOR/COL 09663	Galerucinae	BOLD:ADH6840
Monolepta sp. 4	Pulau Udar Besar	BOR/COL 09664	Galerucinae	BOLD:ADH6840
Monolepta sp. 4	Pulau Udar Besar	BOR/COL 09665	Galerucinae	BOLD:ADH6840
Monolepta sp. 4	Pulau Udar Besar	BOR/COL 09666	Galerucinae	BOLD:ADH6840
Monolepta sp. 4	Pulau Udar Besar	BOR/COL 09667	Galerucinae	BOLD:ADH6840
Monolepta sp. 4	Pulau Dinawan	BOR/COL 09755	Galerucinae	BOLD:ADH6840
Monolepta sp. 4	Pulau Gaya	BOR/COL 09821	Galerucinae	BOLD:ADH6840
Monolepta sp. 4	Pulau Peduk	BOR/COL 09860	Galerucinae	BOLD:ADH6840
Monolepta sp. 4	Pulau Peduk	BOR/COL 09861	Galerucinae	BOLD:ADH6840
Monolepta sp. 4	Pulau Peduk	BOR/COL 09862	Galerucinae	BOLD:ADH6840
Monolepta sp. 4	Pulau Peduk	BOR/COL 09863	Galerucinae	BOLD:ADH6840
Monolepta sp. 4	Pulau Peduk	BOR/COL 09864	Galerucinae	BOLD:ADH6840
Monolepta sp. 4	Pulau Peduk	BOR/COL 09865	Galerucinae	BOLD:ADH6840
Monolepta sp. 4	Pulau Peduk	BOR/COL 09866	Galerucinae	BOLD:ADH6840
Monolepta sp. 4	Pulau Peduk	BOR/COL 09867	Galerucinae	BOLD:ADH6840
Monolepta sp. 4	Pulau Peduk	BOR/COL 09868	Galerucinae	BOLD:ADH6840
Monolepta sp. 4	Pulau Peduk	BOR/COL 09869	Galerucinae	BOLD:ADH6840
Monolepta sp. 4	Pulau Peduk	BOR/COL 09870	Galerucinae	BOLD:ADH6840
Monolepta sp. 4	Pulau Peduk	BOR/COL 09871	Galerucinae	BOLD:ADH6840
Monolepta sp. 4	Pulau Peduk	BOR/COL 09872	Galerucinae	BOLD:ADH6840
Monolepta sp. 4	Pulau Udar Kecil	BOR/COL 09901	Galerucinae	BOLD:ADH6840
Monolepta sp. 4	Pulau Udar Kecil	BOR/COL 09902	Galerucinae	BOLD:ADH6840
Monolepta sp. 4	Pulau Udar Kecil	BOR/COL 09903	Galerucinae	BOLD:ADH6840
Monolepta sp. 4	Pulau Udar Kecil	BOR/COL 09904	Galerucinae	BOLD:ADH6840
Monolepta sp. 4	Pulau Udar Kecil	BOR/COL 09905	Galerucinae	BOLD:ADH6840
Monolepta sp. 4	Pulau Udar Kecil	BOR/COL 09906	Galerucinae	BOLD:ADH6840
Monolepta sp. 4	Pulau Udar Kecil	BOR/COL 09907	Galerucinae	BOLD:ADH6840
Monolepta sp. 4	Pulau Udar Kecil	BOR/COL 09908	Galerucinae	BOLD:ADH6840
Monolepta sp. 4	Pulau Udar Kecil	BOR/COL 09909	Galerucinae	BOLD:ADH6840
Monolepta sp. 4	Pulau Udar Kecil	BOR/COL 09910	Galerucinae	BOLD:ADH6840
Monolepta sp. 4	Pulau Udar Kecil	BOR/COL 09911	Galerucinae	BOLD:ADH6840
Monolepta sp. 4	Pulau Udar Kecil	BOR/COL 09912	Galerucinae	BOLD:ADH6840
Monolepta sp. 4	Pulau Udar Kecil	BOR/COL 09913	Galerucinae	BOLD:ADH6840
Monolepta sp. 4	Pulau Udar Kecil	BOR/COL 09914	Galerucinae	BOLD:ADH6840
Monolepta sp. 4	Pulau Mengalum	BOR/COL 09967	Galerucinae	BOLD:ADH6840
Monolepta sp. 4	Pulau Mengalum	BOR/COL 09968	Galerucinae	BOLD:ADH6840
Monolepta sp. 4	Pulau Mengalum	BOR/COL 09969	Galerucinae	BOLD:ADH6840
Monolepta sp. 4	Pulau Mengalum	BOR/COL 09970	Galerucinae	BOLD:ADH6840
Monolepta sp. 4	Pulau Mengalum	BOR/COL 09971	Galerucinae	BOLD:ADH6840
Monolepta sp. 4	Pulau Mengalum	BOR/COL 09972	Galerucinae	BOLD:ADH6840
Monolepta sp. 4	Pulau Mengalum	BOR/COL 09973	Galerucinae	BOLD:ADH6840
Monolepta sp. 4	Pulau Mengalum	BOR/COL 09974	Galerucinae	BOLD:ADH6840
Monolepta sp. 4	Pulau Mengalum	BOR/COL 09975	Galerucinae	BOLD:ADH6840
Monolepta sp. 4	Pulau Mengalum	BOR/COL 09976	Galerucinae	BOLD:ADH6840
Monolepta sp. 5	Pulau Gaya	BOR/COL 08178	Galerucinae	BOLD:ADH4050
Monolepta sp. 5	Pulau Gaya	BOR/COL 08180	Galerucinae	BOLD:ADH4050
Monolepta sp. 5	Pulau Gaya	BOR/COL 08251	Galerucinae	BOLD:ADH4050
Monolepta sp. 5	Pulau Sapi	BOR/COL 08348	Galerucinae	BOLD:ADH4050
Monolepta sp. 5	Pulau Manukan	BOR/COL 08403	Galerucinae	BOLD:ADH4050
Monolepta sp. 5	Pulau Manukan	BOR/COL 09583	Galerucinae	BOLD:ADH4050
Monolepta sp. 5	Pulau Manukan	BOR/COL 09584	Galerucinae	BOLD:ADH4050
Monolepta sp. 5	Pulau Manukan	BOR/COL 09585	Galerucinae	BOLD:ADH4050
Monolepta sp. 5	Pulau Manukan	BOR/COL 09592	Galerucinae	BOLD:ADH4050
Monolepta sp. 5	Pulau Mamutik	BOR/COL 09603	Galerucinae	BOLD:ADH4050
Monolepta sp. 5	Pulau Mantukod	BOR/COL 09718	Galerucinae	BOLD:ADH4050
Monolepta sp. 5	Pulau Mantukod	BOR/COL 09719	Galerucinae	BOLD:ADH4050
Monolepta sp. 5	Pulau Mantukod	BOR/COL 09722	Galerucinae	BOLD:ADH4050
Monolepta sp. 5	Pulau Mantukod	BOR/COL 09723	Galerucinae	BOLD:ADH4050
Monolepta sp. 5	Pulau Mantukod	BOR/COL 09733	Galerucinae	BOLD:ADH4050
Monolepta sp. 5	Pulau Mantukod	BOR/COL 09734	Galerucinae	BOLD:ADH4050
Monolepta sp. 5	Pulau Mantukod	BOR/COL 09735	Galerucinae	BOLD:ADH4050
Monolepta sp. 5	Pulau Dinawan	BOR/COL 09740	Galerucinae	BOLD:ADH4050
Monolepta sp. 5	Pulau Dinawan	BOR/COL 09741	Galerucinae	BOLD:ADH4050
Monolepta sp. 5	Pulau Udar Kecil	BOR/COL 09897	Galerucinae	BOLD:ADH4050
Monolepta sp. 6	Pulau Tiga	BOR/COL 08531	Galerucinae	BOLD:ADH6249
Monolepta sp. 7	Pulau Sapangar	BOR/COL 08426	Galerucinae	BOLD:ADH4051
Monolepta sp. 7	Pulau Sapangar	BOR/COL 08437	Galerucinae	BOLD:ADH4051
Monolepta sp. 7	Pulau Sapangar	BOR/COL 08438	Galerucinae	BOLD:ADH4051
Monolepta sp. 7	Pulau Sapangar	BOR/COL 08439	Galerucinae	BOLD:ADH4051
Monolepta sp. 7	Pulau Sapangar	BOR/COL 09677	Galerucinae	BOLD:ADH4051
Monolepta sp. 7	Pulau Sapangar	BOR/COL 09717	Galerucinae	BOLD:ADH4051
Monolepta sp. 8	Pulau Gaya	BOR/COL 08314	Galerucinae	BOLD:ADH7150
Monolepta sp. 8	Pulau Gaya	BOR/COL 09299	Galerucinae	BOLD:ADH7150
Monolepta sp. 8	Pulau Gaya	BOR/COL 09300	Galerucinae	BOLD:ADH7150
Monolepta sp. 8	Pulau Gaya	BOR/COL 09301	Galerucinae	BOLD:ADH7150
Monolepta sp. 8	Pulau Gaya	BOR/COL 09824	Galerucinae	BOLD:ADH7150
Monolepta sp. 8	Pulau Gaya	BOR/COL 09826	Galerucinae	BOLD:ADH7150
Monolepta sp. 8	Pulau Gaya	BOR/COL 09827	Galerucinae	BOLD:ADH7150
Monolepta sp. 8	Pulau Gaya	BOR/COL 09828	Galerucinae	BOLD:ADH7150
Monolepta sp. 8	Pulau Gaya	BOR/COL 09829	Galerucinae	BOLD:ADH7150
Monolepta sp. 8	Pulau Gaya	BOR/COL 09830	Galerucinae	BOLD:ADH7150
Monolepta sp. 8	Pulau Gaya	BOR/COL 09831	Galerucinae	BOLD:ADH7150
Monolepta sp. 8	Pulau Gaya	BOR/COL 09832	Galerucinae	BOLD:ADH7150
Monolepta sp. 8	Pulau Gaya	BOR/COL 09833	Galerucinae	BOLD:ADH7150
Monolepta sp. 8	Pulau Gaya	BOR/COL 09834	Galerucinae	BOLD:ADH7150
Monolepta sp. 8	Pulau Gaya	BOR/COL 09835	Galerucinae	BOLD:ADH7150
Monolepta sp. 8	Pulau Gaya	BOR/COL 09841	Galerucinae	BOLD:ADH7150
Monolepta sp. 8	Pulau Gaya	BOR/COL 09939	Galerucinae	BOLD:ADH7150
Monolepta sp. 8	Pulau Gaya	BOR/COL 09940	Galerucinae	BOLD:ADH7150
Monolepta sp. 8	Pulau Gaya	BOR/COL 09941	Galerucinae	BOLD:ADH7150
Monolepta sp. 8	Pulau Gaya	BOR/COL 09942	Galerucinae	BOLD:ADH7150
Monolepta sp. 8	Pulau Gaya	BOR/COL 09943	Galerucinae	BOLD:ADH7150
Monolepta sp. 8	Pulau Gaya	BOR/COL 09944	Galerucinae	BOLD:ADH7150
Monolepta sp. 9	Pulau Gaya	BOR/COL 08276	Galerucinae	BOLD:ADH7149
Monolepta sp. 9	Pulau Tiga	BOR/COL 08525	Galerucinae	BOLD:ADH7149
Monolepta sp. 9	Pulau Tiga	BOR/COL 09153	Galerucinae	BOLD:ADH7149
Monolepta sp. 9	Pulau Tiga	BOR/COL 09165	Galerucinae	BOLD:ADH7149
Monolepta sp. 9	Pulau Tiga	BOR/COL 09166	Galerucinae	BOLD:ADH7149
Monolepta sp. 9	Pulau Gaya	BOR/COL 09330	Galerucinae	BOLD:ADH7149
Monolepta sp. 9	Pulau Gaya	BOR/COL 09435	Galerucinae	BOLD:ADH7149
Monolepta sp. 9	Pulau Gaya	BOR/COL 09436	Galerucinae	BOLD:ADH7149
Monolepta sp. 9	Pulau Gaya	BOR/COL 09437	Galerucinae	BOLD:ADH7149
Monolepta sp. 9	Pulau Gaya	BOR/COL 09440	Galerucinae	BOLD:ADH7149
Monolepta sp. 9	Pulau Gaya	BOR/COL 09441	Galerucinae	BOLD:ADH7149
Monolepta sp. 9	Pulau Gaya	BOR/COL 09443	Galerucinae	BOLD:ADH7149
Monolepta sp. 9	Pulau Sapangar	BOR/COL 09684	Galerucinae	BOLD:ADH7149
Monolepta sp. 9	Pulau Tiga	BOR/COL 09779	Galerucinae	BOLD:ADH7149
Monolepta sp. 9	Pulau Gaya	BOR/COL 09825	Galerucinae	BOLD:ADH7149
Nodina sp.	Pulau Tiga	BOR/COL 06994	Eumolpinae	N/A
Nodina sp.	Pulau Tiga	BOR/COL 08047	Eumolpinae	N/A
Nodina sp.	Pulau Gaya	BOR/COL 08179	Eumolpinae	N/A
Nodina sp.	Pulau Gaya	BOR/COL 08197	Eumolpinae	N/A
Nodina sp.	Pulau Gaya	BOR/COL 08240	Eumolpinae	N/A
Nodina sp.	Pulau Gaya	BOR/COL 08258	Eumolpinae	N/A
Nodina sp.	Pulau Gaya	BOR/COL 08328	Eumolpinae	N/A
Nodina sp.	Pulau Sapi	BOR/COL 08350	Eumolpinae	N/A
Nodina sp.	Pulau Sapi	BOR/COL 08351	Eumolpinae	N/A
Nodina sp.	Pulau Sapi	BOR/COL 08352	Eumolpinae	N/A
Nodina sp.	Pulau Sapi	BOR/COL 08365	Eumolpinae	N/A
Nodina sp.	Pulau Sapi	BOR/COL 08366	Eumolpinae	N/A
Nodina sp.	Pulau Sapi	BOR/COL 08369	Eumolpinae	N/A
Nodina sp.	Pulau Sapi	BOR/COL 08370	Eumolpinae	N/A
Nodina sp.	Pulau Sapi	BOR/COL 08371	Eumolpinae	N/A
Nodina sp.	Pulau Sapi	BOR/COL 08372	Eumolpinae	N/A
Nodina sp.	Pulau Sapi	BOR/COL 08373	Eumolpinae	N/A
Nodina sp.	Pulau Manukan	BOR/COL 08398	Eumolpinae	N/A
Nodina sp.	Pulau Manukan	BOR/COL 08400	Eumolpinae	N/A
Nodina sp.	Pulau Manukan	BOR/COL 08401	Eumolpinae	N/A
Nodina sp.	Pulau Manukan	BOR/COL 08402	Eumolpinae	N/A
Nodina sp.	Pulau Sapangar	BOR/COL 08418	Eumolpinae	N/A
Nodina sp.	Pulau Sapangar	BOR/COL 08419	Eumolpinae	N/A
Nodina sp.	Pulau Sapangar	BOR/COL 08420	Eumolpinae	N/A
Nodina sp.	Pulau Sapangar	BOR/COL 08421	Eumolpinae	N/A
Nodina sp.	Pulau Dinawan	BOR/COL 08447	Eumolpinae	N/A
Nodina sp.	Pulau Dinawan	BOR/COL 08448	Eumolpinae	N/A
Nodina sp.	Pulau Dinawan	BOR/COL 08460	Eumolpinae	N/A
Nodina sp.	Pulau Dinawan	BOR/COL 08461	Eumolpinae	N/A
Nodina sp.	Pulau Dinawan	BOR/COL 08462	Eumolpinae	N/A
Nodina sp.	Pulau Dinawan	BOR/COL 08463	Eumolpinae	N/A
Nodina sp.	Pulau Dinawan	BOR/COL 08464	Eumolpinae	N/A
Nodina sp.	Pulau Dinawan	BOR/COL 08465	Eumolpinae	N/A
Nodina sp.	Pulau Dinawan	BOR/COL 08466	Eumolpinae	N/A
Nodina sp.	Pulau Dinawan	BOR/COL 08467	Eumolpinae	N/A
Nodina sp.	Pulau Dinawan	BOR/COL 08468	Eumolpinae	N/A
Nodina sp.	Pulau Dinawan	BOR/COL 08469	Eumolpinae	N/A
Nodina sp.	Pulau Dinawan	BOR/COL 08473	Eumolpinae	N/A
Nodina sp.	Pulau Dinawan	BOR/COL 08474	Eumolpinae	N/A
Nodina sp.	Pulau Dinawan	BOR/COL 08475	Eumolpinae	N/A
Nodina sp.	Pulau Dinawan	BOR/COL 08476	Eumolpinae	N/A
Nodina sp.	Pulau Dinawan	BOR/COL 08477	Eumolpinae	N/A
Nodina sp.	Pulau Dinawan	BOR/COL 08478	Eumolpinae	N/A
Nodina sp.	Pulau Dinawan	BOR/COL 08479	Eumolpinae	N/A
Nodina sp.	Pulau Dinawan	BOR/COL 08480	Eumolpinae	N/A
Nodina sp.	Pulau Dinawan	BOR/COL 08481	Eumolpinae	N/A
Nodina sp.	Pulau Dinawan	BOR/COL 08482	Eumolpinae	N/A
Nodina sp.	Pulau Dinawan	BOR/COL 08483	Eumolpinae	N/A
Nodina sp.	Pulau Dinawan	BOR/COL 08484	Eumolpinae	N/A
Nodina sp.	Pulau Dinawan	BOR/COL 08485	Eumolpinae	N/A
Nodina sp.	Pulau Mantukod	BOR/COL 08506	Eumolpinae	N/A
Nodina sp.	Pulau Mantukod	BOR/COL 08510	Eumolpinae	N/A
Nodina sp.	Pulau Tiga	BOR/COL 08527	Eumolpinae	N/A
Nodina sp.	Pulau Tiga	BOR/COL 08547	Eumolpinae	N/A
Nodina sp.	Pulau Tiga	BOR/COL 08548	Eumolpinae	N/A
Nodina sp.	Pulau Tiga	BOR/COL 08559	Eumolpinae	N/A
Nodina sp.	Pulau Tiga	BOR/COL 09148	Eumolpinae	N/A
Nodina sp.	Pulau Tiga	BOR/COL 09149	Eumolpinae	N/A
Nodina sp.	Pulau Tiga	BOR/COL 09150	Eumolpinae	N/A
Nodina sp.	Pulau Tiga	BOR/COL 09151	Eumolpinae	N/A
Nodina sp.	Pulau Tiga	BOR/COL 09152	Eumolpinae	N/A
Nodina sp.	Pulau Tiga	BOR/COL 09167	Eumolpinae	N/A
Nodina sp.	Pulau Tiga	BOR/COL 09171	Eumolpinae	N/A
Nodina sp.	Pulau Tiga	BOR/COL 09172	Eumolpinae	N/A
Nodina sp.	Pulau Tiga	BOR/COL 09173	Eumolpinae	N/A
Nodina sp.	Pulau Tiga	BOR/COL 09174	Eumolpinae	N/A
Nodina sp.	Pulau Tiga	BOR/COL 09175	Eumolpinae	N/A
Nodina sp.	Pulau Tiga	BOR/COL 09176	Eumolpinae	N/A
Nodina sp.	Pulau Tiga	BOR/COL 09177	Eumolpinae	N/A
Nodina sp.	Pulau Tiga	BOR/COL 09178	Eumolpinae	N/A
Nodina sp.	Pulau Tiga	BOR/COL 09179	Eumolpinae	N/A
Nodina sp.	Pulau Tiga	BOR/COL 09180	Eumolpinae	N/A
Nodina sp.	Pulau Tiga	BOR/COL 09181	Eumolpinae	N/A
Nodina sp.	Pulau Tiga	BOR/COL 09182	Eumolpinae	N/A
Nodina sp.	Pulau Tiga	BOR/COL 09183	Eumolpinae	N/A
Nodina sp.	Pulau Tiga	BOR/COL 09184	Eumolpinae	N/A
Nodina sp.	Pulau Tiga	BOR/COL 09185	Eumolpinae	N/A
Nodina sp.	Pulau Tiga	BOR/COL 09186	Eumolpinae	N/A
Nodina sp.	Pulau Tiga	BOR/COL 09188	Eumolpinae	N/A
Nodina sp.	Pulau Tiga	BOR/COL 09189	Eumolpinae	N/A
Nodina sp.	Pulau Tiga	BOR/COL 09190	Eumolpinae	N/A
Nodina sp.	Pulau Tiga	BOR/COL 09191	Eumolpinae	N/A
Nodina sp.	Pulau Tiga	BOR/COL 09192	Eumolpinae	N/A
Nodina sp.	Pulau Tiga	BOR/COL 09193	Eumolpinae	N/A
Nodina sp.	Pulau Tiga	BOR/COL 09194	Eumolpinae	N/A
Nodina sp.	Pulau Tiga	BOR/COL 09195	Eumolpinae	N/A
Nodina sp.	Pulau Tiga	BOR/COL 09196	Eumolpinae	N/A
Nodina sp.	Pulau Tiga	BOR/COL 09197	Eumolpinae	N/A
Nodina sp.	Pulau Tiga	BOR/COL 09210	Eumolpinae	N/A
Nodina sp.	Pulau Tiga	BOR/COL 09211	Eumolpinae	N/A
Nodina sp.	Pulau Sapi	BOR/COL 09221	Eumolpinae	N/A
Nodina sp.	Pulau Sapi	BOR/COL 09222	Eumolpinae	N/A
Nodina sp.	Pulau Sapi	BOR/COL 09224	Eumolpinae	N/A
Nodina sp.	Pulau Sapi	BOR/COL 09225	Eumolpinae	N/A
Nodina sp.	Pulau Sapi	BOR/COL 09226	Eumolpinae	N/A
Nodina sp.	Pulau Sapi	BOR/COL 09227	Eumolpinae	N/A
Nodina sp.	Pulau Sapi	BOR/COL 09228	Eumolpinae	N/A
Nodina sp.	Pulau Sapi	BOR/COL 09229	Eumolpinae	N/A
Nodina sp.	Pulau Sapi	BOR/COL 09230	Eumolpinae	N/A
Nodina sp.	Pulau Sapi	BOR/COL 09231	Eumolpinae	N/A
Nodina sp.	Pulau Sapi	BOR/COL 09232	Eumolpinae	N/A
Nodina sp.	Pulau Sapi	BOR/COL 09233	Eumolpinae	N/A
Nodina sp.	Pulau Sapi	BOR/COL 09234	Eumolpinae	N/A
Nodina sp.	Pulau Sapi	BOR/COL 09235	Eumolpinae	N/A
Nodina sp.	Pulau Sapi	BOR/COL 09236	Eumolpinae	N/A
Nodina sp.	Pulau Sapi	BOR/COL 09237	Eumolpinae	N/A
Nodina sp.	Pulau Sapi	BOR/COL 09241	Eumolpinae	N/A
Nodina sp.	Pulau Gaya	BOR/COL 09297	Eumolpinae	N/A
Nodina sp.	Pulau Gaya	BOR/COL 09298	Eumolpinae	N/A
Nodina sp.	Pulau Gaya	BOR/COL 09319	Eumolpinae	N/A
Nodina sp.	Pulau Gaya	BOR/COL 09320	Eumolpinae	N/A
Nodina sp.	Pulau Gaya	BOR/COL 09421	Eumolpinae	N/A
Nodina sp.	Pulau Gaya	BOR/COL 09422	Eumolpinae	N/A
Nodina sp.	Pulau Manukan	BOR/COL 09552	Eumolpinae	N/A
Nodina sp.	Pulau Manukan	BOR/COL 09555	Eumolpinae	N/A
Nodina sp.	Pulau Manukan	BOR/COL 09590	Eumolpinae	N/A
Nodina sp.	Pulau Sapangar	BOR/COL 09676	Eumolpinae	N/A
Nodina sp.	Pulau Sapangar	BOR/COL 09689	Eumolpinae	N/A
Nodina sp.	Pulau Sapangar	BOR/COL 09701	Eumolpinae	N/A
Nodina sp.	Pulau Sapangar	BOR/COL 09702	Eumolpinae	N/A
Nodina sp.	Pulau Sapangar	BOR/COL 09703	Eumolpinae	N/A
Nodina sp.	Pulau Sapangar	BOR/COL 09704	Eumolpinae	N/A
Nodina sp.	Pulau Sapangar	BOR/COL 09705	Eumolpinae	N/A
Nodina sp.	Pulau Sapangar	BOR/COL 09706	Eumolpinae	N/A
Nodina sp.	Pulau Sapangar	BOR/COL 09712	Eumolpinae	N/A
Nodina sp.	Pulau Mantukod	BOR/COL 09731	Eumolpinae	N/A
Nodina sp.	Pulau Dinawan	BOR/COL 09738	Eumolpinae	N/A
Nodina sp.	Pulau Dinawan	BOR/COL 09739	Eumolpinae	N/A
Nodina sp.	Pulau Dinawan	BOR/COL 09748	Eumolpinae	N/A
Nodina sp.	Pulau Dinawan	BOR/COL 09749	Eumolpinae	N/A
Nodina sp.	Pulau Tiga	BOR/COL 09768	Eumolpinae	N/A
Nodina sp.	Pulau Tiga	BOR/COL 09782	Eumolpinae	N/A
Nodina sp.	Pulau Tiga	BOR/COL 09790	Eumolpinae	N/A
Nodina sp.	Pulau Tiga	BOR/COL 09791	Eumolpinae	N/A
Nodina sp.	Pulau Tiga	BOR/COL 09792	Eumolpinae	N/A
Nodina sp.	Pulau Tiga	BOR/COL 09793	Eumolpinae	N/A
Nodina sp.	Pulau Tiga	BOR/COL 09794	Eumolpinae	N/A
Nodina sp.	Pulau Tiga	BOR/COL 09795	Eumolpinae	N/A
Nodina sp.	Pulau Tiga	BOR/COL 09796	Eumolpinae	N/A
Nodina sp.	Pulau Tiga	BOR/COL 09797	Eumolpinae	N/A
Nodina sp.	Pulau Tiga	BOR/COL 09800	Eumolpinae	N/A
Nodina sp.	Pulau Tiga	BOR/COL 09801	Eumolpinae	N/A
Nodina sp.	Pulau Tiga	BOR/COL 09802	Eumolpinae	N/A
Nodina sp.	Pulau Gaya	BOR/COL 09806	Eumolpinae	N/A
Nodina sp.	Pulau Gaya	BOR/COL 09807	Eumolpinae	N/A
Nodina sp.	Pulau Gaya	BOR/COL 09808	Eumolpinae	N/A
Nodina sp.	Pulau Gaya	BOR/COL 09809	Eumolpinae	N/A
Nodina sp.	Pulau Gaya	BOR/COL 09810	Eumolpinae	N/A
Nodina sp.	Pulau Gaya	BOR/COL 09811	Eumolpinae	N/A
Nodina sp.	Pulau Gaya	BOR/COL 09920	Eumolpinae	N/A
Nodina sp.	Pulau Gaya	BOR/COL 09921	Eumolpinae	N/A
Nodina sp.	Pulau Gaya	BOR/COL 09922	Eumolpinae	N/A
Nodina sp.	Pulau Gaya	BOR/COL 09923	Eumolpinae	N/A
Nodina sp.	Pulau Gaya	BOR/COL 09933	Eumolpinae	N/A
Nodina sp.	Pulau Gaya	BOR/COL 09934	Eumolpinae	N/A
Nodina sp.	Pulau Gaya	BOR/COL 09935	Eumolpinae	N/A
Nodina sp.	Pulau Gaya	BOR/COL 09945	Eumolpinae	N/A
Nodina sp.	Pulau Gaya	BOR/COL 09955	Eumolpinae	N/A
Nodina sp.	Pulau Gaya	BOR/COL 09959	Eumolpinae	N/A
Notosacantha sp. 1	Pulau Gaya	BOR/COL 08312	Cassidinae	BOLD:ADH5640
Notosacantha sp. 1	Pulau Gaya	BOR/COL 09446	Cassidinae	BOLD:ADH5640
Notosacantha sp. 1	Pulau Gaya	BOR/COL 09447	Cassidinae	BOLD:ADH5640
Notosacantha sp. 1	Pulau Gaya	BOR/COL 09448	Cassidinae	BOLD:ADH5640
Notosacantha sp. 2	Pulau Tiga	BOR/COL 08540	Cassidinae	BOLD:ADH5641
Notosacantha sp. 2	Pulau Mengalum	BOR/COL 09550	Cassidinae	BOLD:ADH5641
Notosacantha sp. 2	Pulau Mengalum	BOR/COL 09551	Cassidinae	BOLD:ADH5641
Notosacantha sp. 2	Pulau Tiga	BOR/COL 09771	Cassidinae	BOLD:ADH5641
Notosacantha sp. 2	Pulau Tiga	BOR/COL 09772	Cassidinae	BOLD:ADH5641
Notosacantha sp. 2	Pulau Tiga	BOR/COL 09773	Cassidinae	BOLD:ADH5641
Notosacantha sp. 2	Pulau Tiga	BOR/COL 09776	Cassidinae	BOLD:ADH5641
Ochralea nigripes	Pulau Tiga	BOR/COL 08002	Galerucinae	BOLD:ADH4213
Ochralea nigripes	Pulau Tiga	BOR/COL 08003	Galerucinae	BOLD:ADH4213
Ochralea nigripes	Pulau Tiga	BOR/COL 08004	Galerucinae	BOLD:ADH4213
Ochralea nigripes	Pulau Tiga	BOR/COL 08005	Galerucinae	BOLD:ADH4213
Ochralea nigripes	Pulau Tiga	BOR/COL 08015	Galerucinae	BOLD:ADH4213
Ochralea nigripes	Pulau Tiga	BOR/COL 08017	Galerucinae	BOLD:ADH4213
Ochralea nigripes	Pulau Tiga	BOR/COL 08018	Galerucinae	BOLD:ADH4213
Ochralea nigripes	Pulau Tiga	BOR/COL 08019	Galerucinae	BOLD:ADH4213
Ochralea nigripes	Pulau Tiga	BOR/COL 08020	Galerucinae	BOLD:ADH4213
Ochralea nigripes	Pulau Tiga	BOR/COL 08021	Galerucinae	BOLD:ADH4213
Ochralea nigripes	Pulau Tiga	BOR/COL 08022	Galerucinae	BOLD:ADH4213
Ochralea nigripes	Pulau Tiga	BOR/COL 08023	Galerucinae	BOLD:ADH4213
Ochralea nigripes	Pulau Tiga	BOR/COL 08024	Galerucinae	BOLD:ADH4213
Ochralea nigripes	Pulau Tiga	BOR/COL 08025	Galerucinae	BOLD:ADH4213
Ochralea nigripes	Pulau Tiga	BOR/COL 08026	Galerucinae	BOLD:ADH4213
Ochralea nigripes	Pulau Tiga	BOR/COL 08027	Galerucinae	BOLD:ADH4213
Ochralea nigripes	Pulau Tiga	BOR/COL 08028	Galerucinae	BOLD:ADH4213
Ochralea nigripes	Pulau Tiga	BOR/COL 08029	Galerucinae	BOLD:ADH4213
Ochralea nigripes	Pulau Tiga	BOR/COL 08030	Galerucinae	BOLD:ADH4213
Ochralea nigripes	Pulau Tiga	BOR/COL 08031	Galerucinae	BOLD:ADH4213
Ochralea nigripes	Pulau Tiga	BOR/COL 08032	Galerucinae	BOLD:ADH4213
Ochralea nigripes	Pulau Tiga	BOR/COL 08033	Galerucinae	BOLD:ADH4213
Ochralea nigripes	Pulau Tiga	BOR/COL 08034	Galerucinae	BOLD:ADH4213
Ochralea nigripes	Pulau Tiga	BOR/COL 08035	Galerucinae	BOLD:ADH4213
Ochralea nigripes	Pulau Tiga	BOR/COL 08036	Galerucinae	BOLD:ADH4213
Ochralea nigripes	Pulau Tiga	BOR/COL 08037	Galerucinae	BOLD:ADH4213
Ochralea nigripes	Pulau Tiga	BOR/COL 08038	Galerucinae	BOLD:ADH4213
Ochralea nigripes	Pulau Tiga	BOR/COL 08039	Galerucinae	BOLD:ADH4213
Ochralea nigripes	Pulau Tiga	BOR/COL 08048	Galerucinae	BOLD:ADH4213
Ochralea nigripes	Pulau Tiga	BOR/COL 08049	Galerucinae	BOLD:ADH4213
Ochralea nigripes	Pulau Tiga	BOR/COL 08050	Galerucinae	BOLD:ADH4213
Ochralea nigripes	Pulau Gaya	BOR/COL 08201	Galerucinae	BOLD:ADH4213
Ochralea nigripes	Pulau Gaya	BOR/COL 08212	Galerucinae	BOLD:ADH4213
Ochralea nigripes	Pulau Gaya	BOR/COL 08234	Galerucinae	BOLD:ADH4213
Ochralea nigripes	Pulau Gaya	BOR/COL 08319	Galerucinae	BOLD:ADH4213
Ochralea nigripes	Pulau Gaya	BOR/COL 08320	Galerucinae	BOLD:ADH4213
Ochralea nigripes	Pulau Gaya	BOR/COL 08322	Galerucinae	BOLD:ADH4213
Ochralea nigripes	Pulau Gaya	BOR/COL 08327	Galerucinae	BOLD:ADH4213
Ochralea nigripes	Pulau Sapi	BOR/COL 08356	Galerucinae	BOLD:ADH4213
Ochralea nigripes	Pulau Sapi	BOR/COL 08362	Galerucinae	BOLD:ADH4213
Ochralea nigripes	Pulau Mamutik	BOR/COL 08408	Galerucinae	BOLD:ADH4213
Ochralea nigripes	Pulau Mamutik	BOR/COL 08411	Galerucinae	BOLD:ADH4213
Ochralea nigripes	Pulau Mamutik	BOR/COL 08412	Galerucinae	BOLD:ADH4213
Ochralea nigripes	Pulau Mamutik	BOR/COL 08413	Galerucinae	BOLD:ADH4213
Ochralea nigripes	Pulau Mamutik	BOR/COL 08414	Galerucinae	BOLD:ADH4213
Ochralea nigripes	Pulau Mamutik	BOR/COL 08415	Galerucinae	BOLD:ADH4213
Ochralea nigripes	Pulau Mamutik	BOR/COL 08416	Galerucinae	BOLD:ADH4213
Ochralea nigripes	Pulau Tiga	BOR/COL 08515	Galerucinae	BOLD:ADH4213
Ochralea nigripes	Pulau Tiga	BOR/COL 08516	Galerucinae	BOLD:ADH4213
Ochralea nigripes	Pulau Tiga	BOR/COL 08517	Galerucinae	BOLD:ADH4213
Ochralea nigripes	Pulau Tiga	BOR/COL 08518	Galerucinae	BOLD:ADH4213
Ochralea nigripes	Pulau Tiga	BOR/COL 08520	Galerucinae	BOLD:ADH4213
Ochralea nigripes	Pulau Tiga	BOR/COL 08521	Galerucinae	BOLD:ADH4213
Ochralea nigripes	Pulau Tiga	BOR/COL 08522	Galerucinae	BOLD:ADH4213
Ochralea nigripes	Pulau Tiga	BOR/COL 08523	Galerucinae	BOLD:ADH4213
Ochralea nigripes	Pulau Tiga	BOR/COL 08524	Galerucinae	BOLD:ADH4213
Ochralea nigripes	Pulau Tiga	BOR/COL 08528	Galerucinae	BOLD:ADH4213
Ochralea nigripes	Pulau Tiga	BOR/COL 08529	Galerucinae	BOLD:ADH4213
Ochralea nigripes	Pulau Tiga	BOR/COL 08530	Galerucinae	BOLD:ADH4213
Ochralea nigripes	Pulau Tiga	BOR/COL 08542	Galerucinae	BOLD:ADH4213
Ochralea nigripes	Pulau Tiga	BOR/COL 08543	Galerucinae	BOLD:ADH4213
Ochralea nigripes	Pulau Tiga	BOR/COL 08544	Galerucinae	BOLD:ADH4213
Ochralea nigripes	Pulau Tiga	BOR/COL 08555	Galerucinae	BOLD:ADH4213
Ochralea nigripes	Pulau Tiga	BOR/COL 08556	Galerucinae	BOLD:ADH4213
Ochralea nigripes	Pulau Tiga	BOR/COL 08557	Galerucinae	BOLD:ADH4213
Ochralea nigripes	Pulau Tiga	BOR/COL 08558	Galerucinae	BOLD:ADH4213
Ochralea nigripes	Pulau Tiga	BOR/COL 09121	Galerucinae	BOLD:ADH4213
Ochralea nigripes	Pulau Tiga	BOR/COL 09122	Galerucinae	BOLD:ADH4213
Ochralea nigripes	Pulau Tiga	BOR/COL 09123	Galerucinae	BOLD:ADH4213
Ochralea nigripes	Pulau Tiga	BOR/COL 09124	Galerucinae	BOLD:ADH4213
Ochralea nigripes	Pulau Tiga	BOR/COL 09125	Galerucinae	BOLD:ADH4213
Ochralea nigripes	Pulau Tiga	BOR/COL 09126	Galerucinae	BOLD:ADH4213
Ochralea nigripes	Pulau Tiga	BOR/COL 09127	Galerucinae	BOLD:ADH4213
Ochralea nigripes	Pulau Tiga	BOR/COL 09128	Galerucinae	BOLD:ADH4213
Ochralea nigripes	Pulau Tiga	BOR/COL 09129	Galerucinae	BOLD:ADH4213
Ochralea nigripes	Pulau Tiga	BOR/COL 09130	Galerucinae	BOLD:ADH4213
Ochralea nigripes	Pulau Tiga	BOR/COL 09131	Galerucinae	BOLD:ADH4213
Ochralea nigripes	Pulau Tiga	BOR/COL 09132	Galerucinae	BOLD:ADH4213
Ochralea nigripes	Pulau Tiga	BOR/COL 09133	Galerucinae	BOLD:ADH4213
Ochralea nigripes	Pulau Tiga	BOR/COL 09134	Galerucinae	BOLD:ADH4213
Ochralea nigripes	Pulau Tiga	BOR/COL 09135	Galerucinae	BOLD:ADH4213
Ochralea nigripes	Pulau Tiga	BOR/COL 09136	Galerucinae	BOLD:ADH4213
Ochralea nigripes	Pulau Tiga	BOR/COL 09137	Galerucinae	BOLD:ADH4213
Ochralea nigripes	Pulau Tiga	BOR/COL 09138	Galerucinae	BOLD:ADH4213
Ochralea nigripes	Pulau Tiga	BOR/COL 09139	Galerucinae	BOLD:ADH4213
Ochralea nigripes	Pulau Tiga	BOR/COL 09140	Galerucinae	BOLD:ADH4213
Ochralea nigripes	Pulau Tiga	BOR/COL 09141	Galerucinae	BOLD:ADH4213
Ochralea nigripes	Pulau Tiga	BOR/COL 09142	Galerucinae	BOLD:ADH4213
Ochralea nigripes	Pulau Tiga	BOR/COL 09143	Galerucinae	BOLD:ADH4213
Ochralea nigripes	Pulau Tiga	BOR/COL 09144	Galerucinae	BOLD:ADH4213
Ochralea nigripes	Pulau Tiga	BOR/COL 09145	Galerucinae	BOLD:ADH4213
Ochralea nigripes	Pulau Tiga	BOR/COL 09146	Galerucinae	BOLD:ADH4213
Ochralea nigripes	Pulau Tiga	BOR/COL 09147	Galerucinae	BOLD:ADH4213
Ochralea nigripes	Pulau Tiga	BOR/COL 09160	Galerucinae	BOLD:ADH4213
Ochralea nigripes	Pulau Tiga	BOR/COL 09161	Galerucinae	BOLD:ADH4213
Ochralea nigripes	Pulau Tiga	BOR/COL 09162	Galerucinae	BOLD:ADH4213
Ochralea nigripes	Pulau Tiga	BOR/COL 09163	Galerucinae	BOLD:ADH4213
Ochralea nigripes	Pulau Tiga	BOR/COL 09164	Galerucinae	BOLD:ADH4213
Ochralea nigripes	Pulau Tiga	BOR/COL 09198	Galerucinae	BOLD:ADH4213
Ochralea nigripes	Pulau Tiga	BOR/COL 09199	Galerucinae	BOLD:ADH4213
Ochralea nigripes	Pulau Tiga	BOR/COL 09202	Galerucinae	BOLD:ADH4213
Ochralea nigripes	Pulau Tiga	BOR/COL 09203	Galerucinae	BOLD:ADH4213
Ochralea nigripes	Pulau Tiga	BOR/COL 09204	Galerucinae	BOLD:ADH4213
Ochralea nigripes	Pulau Tiga	BOR/COL 09205	Galerucinae	BOLD:ADH4213
Ochralea nigripes	Pulau Tiga	BOR/COL 09206	Galerucinae	BOLD:ADH4213
Ochralea nigripes	Pulau Gaya	BOR/COL 09461	Galerucinae	BOLD:ADH4213
Ochralea nigripes	Pulau Mamutik	BOR/COL 09604	Galerucinae	BOLD:ADH4213
Ochralea nigripes	Pulau Mamutik	BOR/COL 09605	Galerucinae	BOLD:ADH4213
Ochralea nigripes	Pulau Mamutik	BOR/COL 09606	Galerucinae	BOLD:ADH4213
Ochralea nigripes	Pulau Mamutik	BOR/COL 09607	Galerucinae	BOLD:ADH4213
Ochralea nigripes	Pulau Udar Besar	BOR/COL 09668	Galerucinae	BOLD:ADH4213
Ochralea nigripes	Pulau Udar Besar	BOR/COL 09669	Galerucinae	BOLD:ADH4213
Ochralea nigripes	Pulau Sapangar	BOR/COL 09692	Galerucinae	BOLD:ADH4213
Ochralea nigripes	Pulau Sapangar	BOR/COL 09693	Galerucinae	BOLD:ADH4213
Ochralea nigripes	Pulau Sapangar	BOR/COL 09694	Galerucinae	BOLD:ADH4213
Ochralea nigripes	Pulau Sapangar	BOR/COL 09695	Galerucinae	BOLD:ADH4213
Ochralea nigripes	Pulau Sapangar	BOR/COL 09696	Galerucinae	BOLD:ADH4213
Ochralea nigripes	Pulau Sapangar	BOR/COL 09707	Galerucinae	BOLD:ADH4213
Ochralea nigripes	Pulau Tiga	BOR/COL 09780	Galerucinae	BOLD:ADH4213
Ochralea nigripes	Pulau Tiga	BOR/COL 09781	Galerucinae	BOLD:ADH4213
Ochralea nigripes	Pulau Tiga	BOR/COL 09783	Galerucinae	BOLD:ADH4213
Ochralea nigripes	Pulau Tiga	BOR/COL 09784	Galerucinae	BOLD:ADH4213
Ochralea nigripes	Pulau Tiga	BOR/COL 09785	Galerucinae	BOLD:ADH4213
Ochralea nigripes	Pulau Tiga	BOR/COL 09786	Galerucinae	BOLD:ADH4213
Ochralea nigripes	Pulau Tiga	BOR/COL 09787	Galerucinae	BOLD:ADH4213
Ochralea nigripes	Pulau Tiga	BOR/COL 09788	Galerucinae	BOLD:ADH4213
Ochralea nigripes	Pulau Tiga	BOR/COL 09789	Galerucinae	BOLD:ADH4213
Ochralea nigripes	Pulau Tiga	BOR/COL 09798	Galerucinae	BOLD:ADH4213
Ochralea nigripes	Pulau Tiga	BOR/COL 09799	Galerucinae	BOLD:ADH4213
Ochralea nigripes	Pulau Gaya	BOR/COL 09956	Galerucinae	BOLD:ADH4213
Pagria sp.	Pulau Gaya	BOR/COL 09479	Eumolpinae	BOLD:ACW8270
Phola sedecimpustulata	Pulau Peduk	BOR/COL 09882	Chrysomelinae	BOLD:ADH6695
Plagiodera sp.	Pulau Tiga	BOR/COL 08514	Chrysomelinae	BOLD:ADH0536
Rhyparida sp. 1	Pulau Sapi	BOR/COL 06939	Eumolpinae	BOLD:ADH5562
Rhyparida sp. 1	Pulau Sapi	BOR/COL 06940	Eumolpinae	BOLD:ADH5562
Rhyparida sp. 1	Pulau Tiga	BOR/COL 08063	Eumolpinae	BOLD:ADH5562
Rhyparida sp. 1	Pulau Sapi	BOR/COL 08355	Eumolpinae	BOLD:ADH5562
Rhyparida sp. 1	Pulau Sapangar	BOR/COL 08422	Eumolpinae	BOLD:ADH5562
Rhyparida sp. 1	Pulau Dinawan	BOR/COL 08450	Eumolpinae	BOLD:ADH5562
Rhyparida sp. 1	Pulau Dinawan	BOR/COL 08451	Eumolpinae	BOLD:ADH5562
Rhyparida sp. 1	Pulau Dinawan	BOR/COL 08470	Eumolpinae	BOLD:ADH5562
Rhyparida sp. 1	Pulau Mantukod	BOR/COL 08508	Eumolpinae	BOLD:ADH5562
Rhyparida sp. 1	Pulau Tiga	BOR/COL 09159	Eumolpinae	BOLD:ADH5562
Rhyparida sp. 1	Pulau Tiga	BOR/COL 09168	Eumolpinae	BOLD:ADH5562
Rhyparida sp. 1	Pulau Sapi	BOR/COL 09238	Eumolpinae	BOLD:ADH5562
Rhyparida sp. 1	Pulau Sapi	BOR/COL 09239	Eumolpinae	BOLD:ADH5562
Rhyparida sp. 1	Pulau Sapi	BOR/COL 09242	Eumolpinae	BOLD:ADH5562
Rhyparida sp. 1	Pulau Mengalum	BOR/COL 09252	Eumolpinae	BOLD:ADH5562
Rhyparida sp. 1	Pulau Mengalum	BOR/COL 09253	Eumolpinae	BOLD:ADH5562
Rhyparida sp. 1	Pulau Mengalum	BOR/COL 09254	Eumolpinae	BOLD:ADH5562
Rhyparida sp. 1	Pulau Mengalum	BOR/COL 09258	Eumolpinae	BOLD:ADH5562
Rhyparida sp. 1	Pulau Mengalum	BOR/COL 09259	Eumolpinae	BOLD:ADH5562
Rhyparida sp. 1	Pulau Mengalum	BOR/COL 09260	Eumolpinae	BOLD:ADH5562
Rhyparida sp. 1	Pulau Mengalum	BOR/COL 09261	Eumolpinae	BOLD:ADH5562
Rhyparida sp. 1	Pulau Mengalum	BOR/COL 09262	Eumolpinae	BOLD:ADH5562
Rhyparida sp. 1	Pulau Mengalum	BOR/COL 09263	Eumolpinae	BOLD:ADH5562
Rhyparida sp. 1	Pulau Mengalum	BOR/COL 09264	Eumolpinae	BOLD:ADH5562
Rhyparida sp. 1	Pulau Mengalum	BOR/COL 09265	Eumolpinae	BOLD:ADH5562
Rhyparida sp. 1	Pulau Mengalum	BOR/COL 09268	Eumolpinae	BOLD:ADH5562
Rhyparida sp. 1	Pulau Mengalum	BOR/COL 09269	Eumolpinae	BOLD:ADH5562
Rhyparida sp. 1	Pulau Mengalum	BOR/COL 09270	Eumolpinae	BOLD:ADH5562
Rhyparida sp. 1	Pulau Gaya	BOR/COL 09329	Eumolpinae	BOLD:ADH5562
Rhyparida sp. 1	Pulau Gaya	BOR/COL 09425	Eumolpinae	BOLD:ADH5562
Rhyparida sp. 1	Pulau Mengalum	BOR/COL 09459	Eumolpinae	BOLD:ADH5562
Rhyparida sp. 1	Pulau Mengalum	BOR/COL 09496	Eumolpinae	BOLD:ADH5562
Rhyparida sp. 1	Pulau Mengalum	BOR/COL 09497	Eumolpinae	BOLD:ADH5562
Rhyparida sp. 1	Pulau Mengalum	BOR/COL 09498	Eumolpinae	BOLD:ADH5562
Rhyparida sp. 1	Pulau Mengalum	BOR/COL 09499	Eumolpinae	BOLD:ADH5562
Rhyparida sp. 1	Pulau Mengalum	BOR/COL 09500	Eumolpinae	BOLD:ADH5562
Rhyparida sp. 1	Pulau Mengalum	BOR/COL 09501	Eumolpinae	BOLD:ADH5562
Rhyparida sp. 1	Pulau Mengalum	BOR/COL 09518	Eumolpinae	BOLD:ADH5562
Rhyparida sp. 1	Pulau Mengalum	BOR/COL 09519	Eumolpinae	BOLD:ADH5562
Rhyparida sp. 1	Pulau Mengalum	BOR/COL 09520	Eumolpinae	BOLD:ADH5562
Rhyparida sp. 1	Pulau Mengalum	BOR/COL 09521	Eumolpinae	BOLD:ADH5562
Rhyparida sp. 1	Pulau Mengalum	BOR/COL 09522	Eumolpinae	BOLD:ADH5562
Rhyparida sp. 1	Pulau Mengalum	BOR/COL 09523	Eumolpinae	BOLD:ADH5562
Rhyparida sp. 1	Pulau Mengalum	BOR/COL 09524	Eumolpinae	BOLD:ADH5562
Rhyparida sp. 1	Pulau Mengalum	BOR/COL 09525	Eumolpinae	BOLD:ADH5562
Rhyparida sp. 1	Pulau Mengalum	BOR/COL 09526	Eumolpinae	BOLD:ADH5562
Rhyparida sp. 1	Pulau Mengalum	BOR/COL 09527	Eumolpinae	BOLD:ADH5562
Rhyparida sp. 1	Pulau Mengalum	BOR/COL 09528	Eumolpinae	BOLD:ADH5562
Rhyparida sp. 1	Pulau Mengalum	BOR/COL 09529	Eumolpinae	BOLD:ADH5562
Rhyparida sp. 1	Pulau Mengalum	BOR/COL 09530	Eumolpinae	BOLD:ADH5562
Rhyparida sp. 1	Pulau Mengalum	BOR/COL 09532	Eumolpinae	BOLD:ADH5562
Rhyparida sp. 1	Pulau Mengalum	BOR/COL 09533	Eumolpinae	BOLD:ADH5562
Rhyparida sp. 1	Pulau Mengalum	BOR/COL 09534	Eumolpinae	BOLD:ADH5562
Rhyparida sp. 1	Pulau Mengalum	BOR/COL 09535	Eumolpinae	BOLD:ADH5562
Rhyparida sp. 1	Pulau Mengalum	BOR/COL 09536	Eumolpinae	BOLD:ADH5562
Rhyparida sp. 1	Pulau Mengalum	BOR/COL 09537	Eumolpinae	BOLD:ADH5562
Rhyparida sp. 1	Pulau Mengalum	BOR/COL 09540	Eumolpinae	BOLD:ADH5562
Rhyparida sp. 1	Pulau Mengalum	BOR/COL 09549	Eumolpinae	BOLD:ADH5562
Rhyparida sp. 1	Pulau Sapangar	BOR/COL 09675	Eumolpinae	BOLD:ADH5562
Rhyparida sp. 1	Pulau Sapangar	BOR/COL 09697	Eumolpinae	BOLD:ADH5562
Rhyparida sp. 1	Pulau Sapangar	BOR/COL 09698	Eumolpinae	BOLD:ADH5562
Rhyparida sp. 1	Pulau Sapangar	BOR/COL 09700	Eumolpinae	BOLD:ADH5562
Rhyparida sp. 1	Pulau Mantukod	BOR/COL 09724	Eumolpinae	BOLD:ADH5562
Rhyparida sp. 1	Pulau Mantukod	BOR/COL 09725	Eumolpinae	BOLD:ADH5562
Rhyparida sp. 1	Pulau Mantukod	BOR/COL 09726	Eumolpinae	BOLD:ADH5562
Rhyparida sp. 1	Pulau Mantukod	BOR/COL 09727	Eumolpinae	BOLD:ADH5562
Rhyparida sp. 1	Pulau Mantukod	BOR/COL 09728	Eumolpinae	BOLD:ADH5562
Rhyparida sp. 1	Pulau Mantukod	BOR/COL 09729	Eumolpinae	BOLD:ADH5562
Rhyparida sp. 1	Pulau Dinawan	BOR/COL 09742	Eumolpinae	BOLD:ADH5562
Rhyparida sp. 1	Pulau Dinawan	BOR/COL 09743	Eumolpinae	BOLD:ADH5562
Rhyparida sp. 1	Pulau Dinawan	BOR/COL 09744	Eumolpinae	BOLD:ADH5562
Rhyparida sp. 1	Pulau Dinawan	BOR/COL 09745	Eumolpinae	BOLD:ADH5562
Rhyparida sp. 1	Pulau Dinawan	BOR/COL 09746	Eumolpinae	BOLD:ADH5562
Rhyparida sp. 1	Pulau Tiga	BOR/COL 09767	Eumolpinae	BOLD:ADH5562
Rhyparida sp. 2	Pulau Gaya	BOR/COL 08196	Eumolpinae	BOLD:ADH5563
Rhyparida sp. 2	Pulau Gaya	BOR/COL 08262	Eumolpinae	BOLD:ADH5563
Rhyparida sp. 2	Pulau Gaya	BOR/COL 08269	Eumolpinae	BOLD:ADH5563
Rhyparida sp. 2	Pulau Gaya	BOR/COL 08311	Eumolpinae	BOLD:ADH5563
Rhyparida sp. 2	Pulau Dinawan	BOR/COL 08471	Eumolpinae	BOLD:ADH5563
Rhyparida sp. 2	Pulau Dinawan	BOR/COL 08472	Eumolpinae	BOLD:ADH5563
Rhyparida sp. 2	Pulau Sapi	BOR/COL 09212	Eumolpinae	BOLD:ADH5563
Rhyparida sp. 2	Pulau Sapi	BOR/COL 09213	Eumolpinae	BOLD:ADH5563
Rhyparida sp. 2	Pulau Sapi	BOR/COL 09214	Eumolpinae	BOLD:ADH5563
Rhyparida sp. 2	Pulau Mengalum	BOR/COL 09250	Eumolpinae	BOLD:ADH5563
Rhyparida sp. 2	Pulau Mengalum	BOR/COL 09251	Eumolpinae	BOLD:ADH5563
Rhyparida sp. 2	Pulau Mengalum	BOR/COL 09255	Eumolpinae	BOLD:ADH5563
Rhyparida sp. 2	Pulau Mengalum	BOR/COL 09256	Eumolpinae	BOLD:ADH5563
Rhyparida sp. 2	Pulau Mengalum	BOR/COL 09257	Eumolpinae	BOLD:ADH5563
Rhyparida sp. 2	Pulau Mengalum	BOR/COL 09266	Eumolpinae	BOLD:ADH5563
Rhyparida sp. 2	Pulau Mengalum	BOR/COL 09267	Eumolpinae	BOLD:ADH5563
Rhyparida sp. 2	Pulau Gaya	BOR/COL 09322	Eumolpinae	BOLD:ADH5563
Rhyparida sp. 2	Pulau Gaya	BOR/COL 09323	Eumolpinae	BOLD:ADH5563
Rhyparida sp. 2	Pulau Gaya	BOR/COL 09324	Eumolpinae	BOLD:ADH5563
Rhyparida sp. 2	Pulau Gaya	BOR/COL 09325	Eumolpinae	BOLD:ADH5563
Rhyparida sp. 2	Pulau Gaya	BOR/COL 09326	Eumolpinae	BOLD:ADH5563
Rhyparida sp. 2	Pulau Gaya	BOR/COL 09327	Eumolpinae	BOLD:ADH5563
Rhyparida sp. 2	Pulau Gaya	BOR/COL 09328	Eumolpinae	BOLD:ADH5563
Rhyparida sp. 2	Pulau Gaya	BOR/COL 09414	Eumolpinae	BOLD:ADH5563
Rhyparida sp. 2	Pulau Gaya	BOR/COL 09426	Eumolpinae	BOLD:ADH5563
Rhyparida sp. 2	Pulau Gaya	BOR/COL 09427	Eumolpinae	BOLD:ADH5563
Rhyparida sp. 2	Pulau Mengalum	BOR/COL 09502	Eumolpinae	BOLD:ADH5563
Rhyparida sp. 2	Pulau Mengalum	BOR/COL 09503	Eumolpinae	BOLD:ADH5563
Rhyparida sp. 2	Pulau Mengalum	BOR/COL 09504	Eumolpinae	BOLD:ADH5563
Rhyparida sp. 2	Pulau Mengalum	BOR/COL 09505	Eumolpinae	BOLD:ADH5563
Rhyparida sp. 2	Pulau Mengalum	BOR/COL 09506	Eumolpinae	BOLD:ADH5563
Rhyparida sp. 2	Pulau Mengalum	BOR/COL 09509	Eumolpinae	BOLD:ADH5563
Rhyparida sp. 2	Pulau Mengalum	BOR/COL 09510	Eumolpinae	BOLD:ADH5563
Rhyparida sp. 2	Pulau Mengalum	BOR/COL 09511	Eumolpinae	BOLD:ADH5563
Rhyparida sp. 2	Pulau Mengalum	BOR/COL 09512	Eumolpinae	BOLD:ADH5563
Rhyparida sp. 2	Pulau Mengalum	BOR/COL 09513	Eumolpinae	BOLD:ADH5563
Rhyparida sp. 2	Pulau Mengalum	BOR/COL 09514	Eumolpinae	BOLD:ADH5563
Rhyparida sp. 2	Pulau Mengalum	BOR/COL 09515	Eumolpinae	BOLD:ADH5563
Rhyparida sp. 2	Pulau Mengalum	BOR/COL 09516	Eumolpinae	BOLD:ADH5563
Rhyparida sp. 2	Pulau Mengalum	BOR/COL 09517	Eumolpinae	BOLD:ADH5563
Rhyparida sp. 2	Pulau Mengalum	BOR/COL 09538	Eumolpinae	BOLD:ADH5563
Rhyparida sp. 2	Pulau Mengalum	BOR/COL 09539	Eumolpinae	BOLD:ADH5563
Rhyparida sp. 2	Pulau Mengalum	BOR/COL 09541	Eumolpinae	BOLD:ADH5563
Rhyparida sp. 2	Pulau Mengalum	BOR/COL 09542	Eumolpinae	BOLD:ADH5563
Rhyparida sp. 2	Pulau Mengalum	BOR/COL 09543	Eumolpinae	BOLD:ADH5563
Rhyparida sp. 2	Pulau Mengalum	BOR/COL 09544	Eumolpinae	BOLD:ADH5563
Rhyparida sp. 2	Pulau Mengalum	BOR/COL 09545	Eumolpinae	BOLD:ADH5563
Rhyparida sp. 2	Pulau Mengalum	BOR/COL 09546	Eumolpinae	BOLD:ADH5563
Rhyparida sp. 2	Pulau Mengalum	BOR/COL 09547	Eumolpinae	BOLD:ADH5563
Rhyparida sp. 2	Pulau Mengalum	BOR/COL 09548	Eumolpinae	BOLD:ADH5563
Rhyparida sp. 2	Pulau Manukan	BOR/COL 09581	Eumolpinae	BOLD:ADH5563
Rhyparida sp. 2	Pulau Sapangar	BOR/COL 09708	Eumolpinae	BOLD:ADH5563
Rhyparida sp. 2	Pulau Sapangar	BOR/COL 09715	Eumolpinae	BOLD:ADH5563
Rhyparida sp. 2	Pulau Sapangar	BOR/COL 09716	Eumolpinae	BOLD:ADH5563
Rhyparida sp. 2	Pulau Mantukod	BOR/COL 09730	Eumolpinae	BOLD:ADH5563
Rhyparida sp. 2	Pulau Udar Kecil	BOR/COL 09896	Eumolpinae	BOLD:ADH5563
Rhyparida sp. 2	Pulau Udar Kecil	BOR/COL 09898	Eumolpinae	BOLD:ADH5563
Rhyparida sp. 2	Pulau Mengalum	BOR/COL 09963	Eumolpinae	BOLD:ADH5563
Rhyparida sp. 2	Pulau Mengalum	BOR/COL 09964	Eumolpinae	BOLD:ADH5563
Rhyparida sp. 2	Pulau Mengalum	BOR/COL 09965	Eumolpinae	BOLD:ADH5563
Rhyparida sp. 2	Pulau Mengalum	BOR/COL 09966	Eumolpinae	BOLD:ADH5563
Rhyparida sp. 2	Pulau Mengalum	BOR/COL 09978	Eumolpinae	BOLD:ADH5563
Rhyparida sp. 2	Pulau Mengalum	BOR/COL 09979	Eumolpinae	BOLD:ADH5563
Rhyparida sp. 2	Pulau Mengalum	BOR/COL 09980	Eumolpinae	BOLD:ADH5563
Scelodonta granulosa	Pulau Mengalum	BOR/COL 09531	Eumolpinae	BOLD:ADE7488
Scelodonta granulosa	Pulau Sapangar	BOR/COL 09682	Eumolpinae	BOLD:ADE7488
Schenklingia sp.	Pulau Gaya	BOR/COL 09429	Galerucinae	BOLD:ADH3903
Strobiderus sp.	Pulau Tiga	BOR/COL 06995	Galerucinae	BOLD:ADH6702
Strobiderus sp.	Pulau Tiga	BOR/COL 06996	Galerucinae	BOLD:ADH6702
Strobiderus sp.	Pulau Tiga	BOR/COL 06997	Galerucinae	BOLD:ADH6702
Strobiderus sp.	Pulau Tiga	BOR/COL 06998	Galerucinae	BOLD:ADH6702
Strobiderus sp.	Pulau Tiga	BOR/COL 06999	Galerucinae	BOLD:ADH6702
Strobiderus sp.	Pulau Tiga	BOR/COL 09155	Galerucinae	BOLD:ADH6702
Strobiderus sp.	Pulau Tiga	BOR/COL 09156	Galerucinae	BOLD:ADH6702
Sumatrasia sp.	Pulau Sapi	BOR/COL 06938	Galerucinae	BOLD:ADH4430
